# Supplementary material for: Comparative Lipidomic Study of Human Milk from Different Lactation Stages and Milk Formulas
Source: PubMed Central journal article supplement (PMC7401268; doi:10.3390/nu12072165), 2020-07-21
Supplement: nutrients-12-02165-s001.pdf [file nutrients-12-02165-s001.pdf]

## Supplementary Materials

# Comparative lipidomic study of human milk from different lactation stages, and milk formulas

Weronika Hewelt-Belka <sup>1,\*</sup>, Dorota Garwolińska <sup>1</sup>, Michał Młynarczyk <sup>1</sup> and Agata Kot-Wasik <sup>1</sup>

<sup>1</sup> Department of Analytical Chemistry, Chemical Faculty, Gdańsk University of Technology

\* Correspondence: weronika.belka@pg.edu.pl

### Table of contents

|                                                                                                                                                                                                                      |      |
|----------------------------------------------------------------------------------------------------------------------------------------------------------------------------------------------------------------------|------|
| Inclusion criteria for HM sample donors                                                                                                                                                                              | S-2  |
| Table S1. Characteristics of the analyzed milk samples.                                                                                                                                                              | S-2  |
| Figure S1. The fragmentation pattern for PIs, PSs and ether analogues of TGs and PEs                                                                                                                                 | S-4  |
| Table S2. List of the identified lipids included in the batch targeted extraction.                                                                                                                                   | S-5  |
| Figure S2. The total ion chromatograms (TICs) of the lipid extracts of the FM and HM                                                                                                                                 | S-11 |
| Table S3. The % relative amount of lipid species within specific class of lipids in colostrum samples                                                                                                                | S-12 |
| Table S4. The % relative amount of lipid species within specific class of lipids in HM samples collected between 0 and 6 months                                                                                      | S-14 |
| Table S5. The % relative amount of lipid species within specific class of lipids in HM samples collected between 6 and 12 months.                                                                                    | S-16 |
| Table S6. The % relative amount of lipid species within specific class of lipids in HM samples collected after 12 months.                                                                                            | S-19 |
| Table S7. The % relative amount of lipid species within specific class of lipids in FM samples                                                                                                                       | S-22 |
| Table S8. The complete list of statistically significantly different between the colostrum and further lactation stage samples accordingly to the ANOVA unequal variance test                                        | S-26 |
| Table S9. Lipids statistically significantly different between the colostrum and further lactation stage HM samples accordingly to the Mann-Whitney test unpaired.                                                   | S-32 |
| Table S10. The complete list of statistically significantly different lipids between the samples of caprine whole milk-based FM and FM supplemented with soy lecithin accordingly to the Mann-Whitney test unpaired. | S-35 |
| Table S11. Lipids indicating a statistically significant ( $p < 0.01$ ) difference between HM and FM samples in the different lactation stages and age range targets.                                                | S-38 |
| Figure S3. Clustering shown as a heatmap for the top 80 TGs indicated in the test t.                                                                                                                                 | S-46 |
| Figure S4. Clustering shown as a heatmap for the PCs detected in HM and/or FM samples.                                                                                                                               | S-47 |
| Figure S5. Clustering shown as a heatmap for the SMs detected in HM and/or FM samples.                                                                                                                               | S-47 |
| Figure S 6. Clustering shown as a heatmap for the PEs, PIs and PSs detected in HM and/or FM samples.                                                                                                                 | S-48 |
| Figure S7. The MS/MS spectra and FA distribution of the TG 50:2 detected in HM and FM samples.                                                                                                                       | S-49 |

### Inclusion criteria for HM sample donors

Women and their children participating in the study had to meet the inclusion criteria:

- mothers of singleton infants breastfeeding exclusively/fully lactating for the first 6 months,
- breastfeeding mothers of singleton infants at age 6 months or higher (complementary foods starting at 6 months was permitted for all infants as per American Academy of Pediatrics (AAP) guidelines and World Health Organization recommendations as long as their sole milk source was maternal breast milk up to the age of 1 year,
- infants had to be  $\geq 35$  weeks' gestation and in good general health at the time of enrollment.

Subject exclusion criteria included:

- mothers diagnose: preexisting type I or II diabetes, hypertension, parathyroid disease, and uncontrolled thyroid disease.
- twins or multiple births
- infants < 35 weeks' gestation; with a history of 72 hours in the NICU; any inborn error of metabolism; the history of congenital anomalies; or a history of consuming 10% of their diet as formula at the time of enrollment
- combined feeding at the time of enrollment (i.e., partially breastfeeding and formula-feeding their infants).

**Table S2. Characteristics of the analyzed milk samples.**

| Sample ID           | Milk type | Lactation month | Lactation stage/age target | FM brand       |
|---------------------|-----------|-----------------|----------------------------|----------------|
| FM.1.1 <sup>a</sup> | FM        | Not applicable  | 0-6                        | 1              |
| FM.1.2              | FM        | Not applicable  | 6-12                       | 1              |
| FM.1.3              | FM        | Not applicable  | >12                        | 1              |
| FM.2.1              | FM        | Not applicable  | 0-6                        | 2              |
| FM.2.2              | FM        | Not applicable  | 6-12                       | 2              |
| FM.2.3              | FM        | Not applicable  | >12                        | 2              |
| FM.3.1              | FM        | Not applicable  | 0-6                        | 3              |
| FM.3.2              | FM        | Not applicable  | 6-12                       | 3              |
| FM.4.1              | FM        | Not applicable  | 0-6                        | 4              |
| FM.4.2              | FM        | Not applicable  | 6-12                       | 4              |
| FM.4.3              | FM        | Not applicable  | >12                        | 4              |
| FM.4.1.FMGM         | FM        | Not applicable  | 0-6                        | 4              |
| FM.5.1              | FM        | Not applicable  | 0-6                        | 5              |
| FM.5.2              | FM        | Not applicable  | 6-12                       | 5              |
| FM.5.3              | FM        | Not applicable  | >12                        | 5              |
| FM.6.1              | FM        | Not applicable  | 0-6                        | 6              |
| FM.6.2              | FM        | Not applicable  | 6-12                       | 6              |
| FM.6.3              | FM        | Not applicable  | >12                        | 6              |
| FM.7.1              | FM        | Not applicable  | 0-6                        | 7              |
| FM.7.2              | FM        | Not applicable  | 6-12                       | 7              |
| W.1.1.E             | HM        | 6               | 0-6                        | Not applicable |
| W.1.1.M             | HM        | 6               | 0-6                        | Not applicable |
| W.1.1(4M).E         | HM        | 4               | 0-6                        | Not applicable |
| W.1.1(4M).M         | HM        | 4               | 0-6                        | Not applicable |
| W.2.1.M             | HM        | 4               | 0-6                        | Not applicable |

|                |    |    |           |                |
|----------------|----|----|-----------|----------------|
| W.2.1.E        | HM | 4  | 0-6       | Not applicable |
| W.3.3.M        | HM | 18 | >12       | Not applicable |
| W.3.3.E        | HM | 18 | >12       | Not applicable |
| W.4.2.E        | HM | 7  | 6-12      | Not applicable |
| W.5.1.M        | HM | 6  | 0-6       | Not applicable |
| W.5.1.E        | HM | 6  | 0-6       | Not applicable |
| W.6.2.(8M).M   | HM | 8  | 6-12      | Not applicable |
| W.6.2.(10M).M  | HM | 10 | 6-12      | Not applicable |
| W.6.2.(8M).M2  | HM | 8  | 6-12      | Not applicable |
| W.6.2.(10M).M2 | HM | 10 | 6-12      | Not applicable |
| W.6.2.(10M).M2 | HM | 10 | 6-12      | Not applicable |
| W.7.3.M        | HM | 13 | >12       | Not applicable |
| W.7.3.E        | HM | 15 | >12       | Not applicable |
| W.8.3.M        | HM | 13 | >12       | Not applicable |
| W.8.3.E        | HM | 13 | >12       | Not applicable |
| W.9.3.M        | HM | 15 | >12       | Not applicable |
| W.9.3.E        | HM | 15 | >12       | Not applicable |
| W.10.3.M       | HM | 16 | >12       | Not applicable |
| W.10.3.E       | HM | 16 | >12       | Not applicable |
| W.11.3.M       | HM | 18 | >12       | Not applicable |
| W.11.3.E       | HM | 18 | >12       | Not applicable |
| W.12.1.M       | HM | 6  | 0-6       | Not applicable |
| W.12.1.E       | HM | 6  | 0-6       | Not applicable |
| W.13.3.        | HM | 19 | >12       | Not applicable |
| W.13.3.R       | HM | 19 | >12       | Not applicable |
| W.14.3.M       | HM | 14 | >12       | Not applicable |
| W.14.3.M       | HM | 14 | >12       | Not applicable |
| W.15.2.M       | HM | 10 | 6-12      | Not applicable |
| W.15.2.E       | HM | 10 | 6-12      | Not applicable |
| W.16.0         | HM | 0  | Colostrum | Not applicable |
| W.17.0         | HM | 0  | Colostrum | Not applicable |
| W.18.0         | HM | 0  | Colostrum | Not applicable |
| W.19.0         | HM | 0  | Colostrum | Not applicable |
| W.20.0         | HM | 0  | Colostrum | Not applicable |
| W.21.0         | HM | 0  | Colostrum | Not applicable |
| W.22.0         | HM | 0  | Colostrum | Not applicable |
| W.23.0         | HM | 0  | Colostrum | Not applicable |
| W.24.0         | HM | 0  | Colostrum | Not applicable |
| W.25.0         | HM | 0  | Colostrum | Not applicable |
| W.26.0         | HM | 0  | Colostrum | Not applicable |

<sup>a</sup> FM1.1, sample of formula milk from brand 1 dedicated for the 0-6 mo. age range target; FM1.2, sample of formula milk from brand 1 dedicated for the 6-12 mo. age range target; FM1.3, sample of formula milk from brand 1 dedicated for the > 12 mo. age range target; <sup>b</sup> W.16.0, sample of human milk collected from woman with the ID no. 1 in the lactation stage HM colostrum; W.1.1.E, sample of human milk collected from woman with the ID no. 1 in the lactation stage (0-6 mo.) in the evening; W.1.1.M, sample of human milk collected from woman with the ID no. 1 in the lactation stage (0-6 mo.) in the morning;

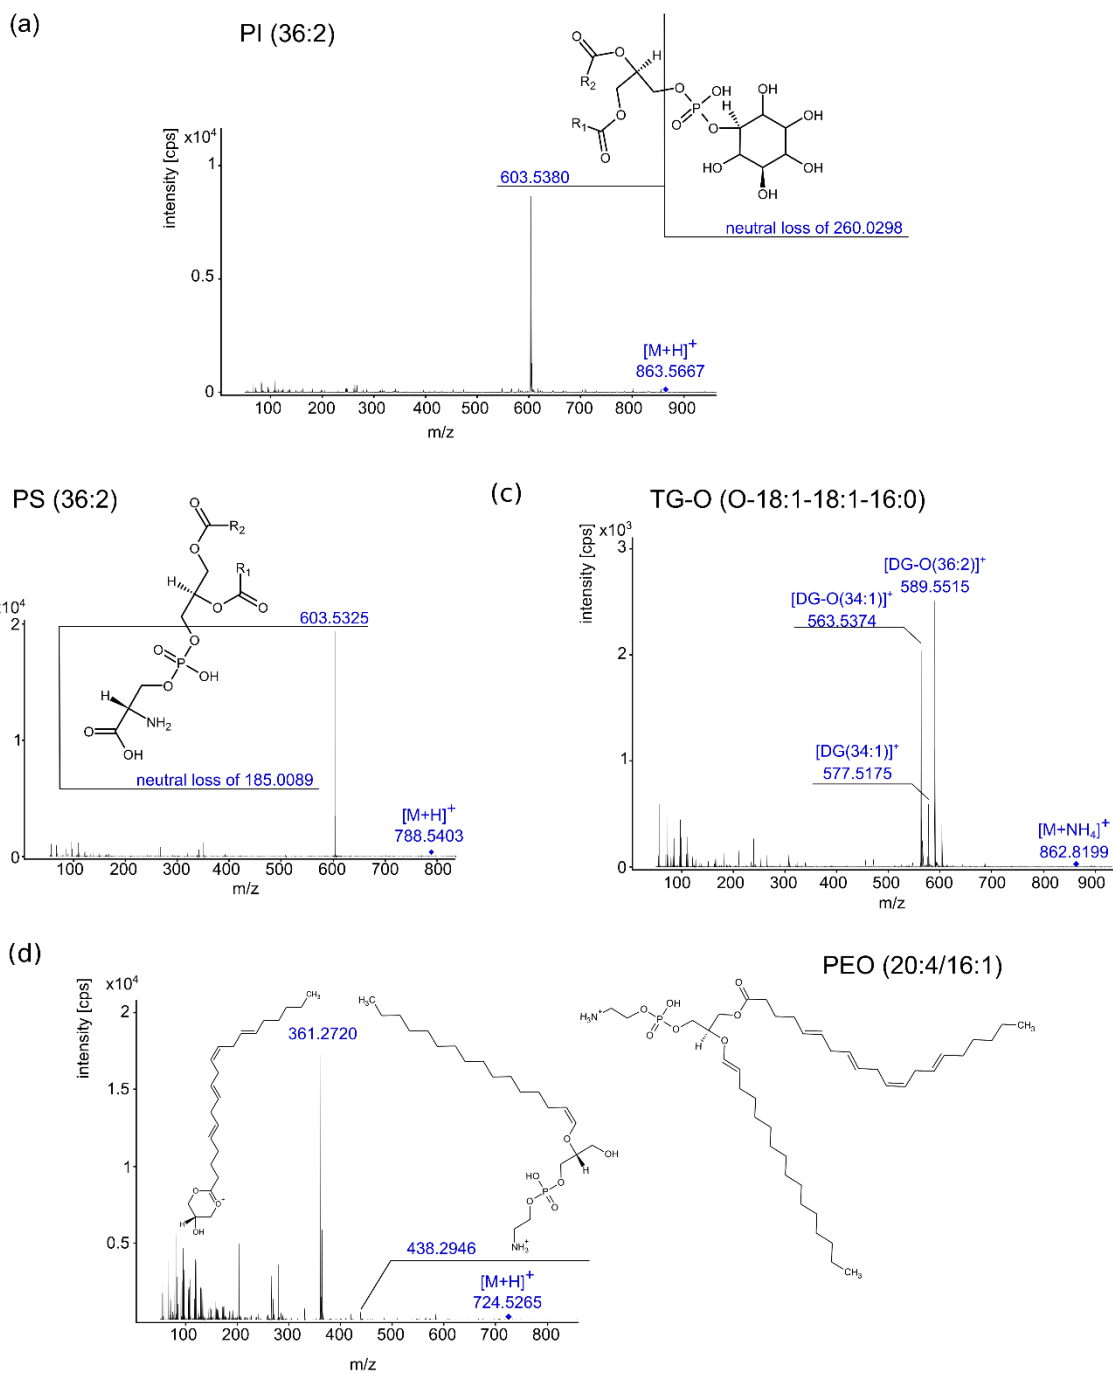

Figure S1. The fragmentation pattern for PIs, PSs and ether analogues of TGs and PEs

**Table S2. List of the identified lipids included in the batch targeted extraction.**

| <b>Lipid name</b>             | <b>Formula</b>   | <b>Retention time<br/>[min]</b> | <b>Measured mass<sup>a</sup></b> | <b>Fatty acid<br/>composition</b> |
|-------------------------------|------------------|---------------------------------|----------------------------------|-----------------------------------|
| DG18:0                        | C21 H40 O5       | 2.76                            | 394.268                          |                                   |
| DG20:0                        | C23 H44 O5       | 3.29                            | 422.2997                         |                                   |
| DG22:0                        | C25 H48 O5       | 4.25                            | 450.3306                         |                                   |
| DG24:0                        | C27 H52 O5       | 5.31                            | 478.3612                         |                                   |
| DG32:0                        | C35 H68 O5       | 13.34                           | 590.4877                         |                                   |
| DG32:1                        | C35 H66 O5       | 11.60                           | 588.4717                         |                                   |
| DG34:0                        | C37 H72 O5       | 15.71                           | 618.5182                         |                                   |
| DG34:1                        | C37 H70 O5       | 13.93                           | 616.5023                         |                                   |
| DG34:2                        | C37 H68 O5       | 12.47                           | 614.4865                         |                                   |
| DG36:1                        | C39 H74 O5       | 16.70                           | 644.5332                         |                                   |
| DG36:2                        | C39 H72 O5       | 14.74                           | 642.5172                         |                                   |
| DG36:3                        | C39 H70 O5       | 13.46                           | 640.5025                         |                                   |
| DG36:4                        | C39 H68 O5       | 11.77                           | 638.4865                         |                                   |
| LysoPC12:0                    | C20 H42 N1 O7 P1 | 1.50                            | 439.2688                         |                                   |
| LysoPC14:0                    | C22 H46 N1 O7 P1 | 1.78                            | 467.3627                         |                                   |
| LysoPC16:0                    | C24 H50 N1 O7 P1 | 2.11                            | 495.3314                         |                                   |
| LysoPC16:1                    | C24 H48 N1 O7 P1 | 1.88                            | 493.3155                         |                                   |
| LysoPC18:0                    | C26 H54 N1 O7 P1 | 2.58                            | 523.3620                         |                                   |
| LysoPC18:1                    | C26 H52 N1 O7 P1 | 2.25                            | 521.3468                         |                                   |
| LysoPC18:2                    | C26 H50 N1 O7 P1 | 1.99                            | 519.3336                         |                                   |
| LysoPC18:3                    | C26 H48 N1 O7 P1 | 1.80                            | 517.3150                         |                                   |
| LysoPC22:6                    | C30H50NO7P       | 1.94                            | 567.3324                         |                                   |
| LysoPCO-<br>18:0/LysoPEO-21:0 | C26 H54 N1 O6 P1 | 2.55                            | 507.3675                         |                                   |
| LysoPE18:0                    | C23 H48 N1 O7 P1 | 2.56                            | 481.3154                         |                                   |
| LysoPE18:1                    | C23 H46 N1 O7 P1 | 2.23                            | 479.2999                         |                                   |
| LysoPE18:2                    | C23 H44 N1 O7 P1 | 1.98                            | 477.2855                         |                                   |
| MG16:0                        | C19H38O4         | 2.59                            | 352.2575                         |                                   |
| MG18:0                        | C21H42O4         | 3.29                            | 380.2886                         |                                   |
| MG18:1                        | C21H40O4         | 2.76                            | 378.2731                         |                                   |
| PA46:3                        | C49H91O8P        | 17.10                           | 838.6451                         |                                   |
| PC24:0                        | C32 H64 N1 O8 P1 | 3.82                            | 621.4350                         |                                   |
| PC26:0                        | C34 H68 N1 O8 P1 | 4.78                            | 649.4668                         |                                   |
| PC28:0                        | C36 H72 N1 O8 P1 | 6.07                            | 677.4979                         |                                   |
| PC29:0                        | C37 H74 N1 O8 P1 | 6.90                            | 691.5127                         |                                   |
| PC30:0                        | C38 H76 N1 O8 P1 | 7.60                            | 705.5292                         |                                   |
| PC30:1                        | C38 H74 N1 O8 P1 | 6.60                            | 703.5142                         |                                   |
| PC31:0                        | C39 H78 N1 O8 P1 | 8.60                            | 719.5448                         |                                   |
| PC32:0                        | C40 H80 N1 O8 P1 | 9.30                            | 733.5607                         |                                   |
| PC32:1                        | C40 H78 N1 O8 P1 | 8.10                            | 731.5518                         |                                   |
| PC32:2                        | C40 H76 N1 O8 P1 | 7.10                            | 729.5299                         |                                   |
| PC33:0                        | C41 H82 N1 O8 P1 | 10.40                           | 747.5759                         |                                   |
| PC33:1                        | C41 H80 N1 O8 P1 | 9.20                            | 745.5607                         |                                   |
| PC33:2                        | C41 H78 N1 O8 P1 | 8.07                            | 743.5440                         |                                   |

|          |                      |           |          |           |
|----------|----------------------|-----------|----------|-----------|
| PC34:0   | C42 H84 N1 O8 P1     | 11.54     | 761.5923 |           |
| PC34:1   | C42 H82 N1 O8 P1     | 10.10     | 759.5760 |           |
| PC34:2   | C42 H80 N1 O8 P1     | 8.84      | 757.5607 |           |
| PC34:3   | C42 H78 N1 O8 P1     | 7.75      | 755.5459 |           |
| PC35:1   | C43 H84 N1 O8 P1     | 11.30     | 773.5911 |           |
| PC35:2   | C43 H82 N1 O8 P1     | 9.90      | 771.5763 |           |
| PC36:1   | C44 H86 N1 O8 P1     | 12.33     | 787.6074 |           |
| PC36:2   | C44 H84 N1 O8 P1     | 10.89     | 785.5917 |           |
| PC36:3   | C44 H82 N1 O8 P1     | 9.48      | 783.5763 |           |
| PC36:4   | C44 H80 N1 O8 P1     | 8.40      | 781.5603 |           |
| PC36:5   | C44 H78 N1 O8 P1     | 7.15      | 779.5427 |           |
| PC36:6   | C44 H76 N1 O8 P1     | 6.25      | 777.5279 |           |
| PC38:3   | C46 H86 N1 O8 P1     | 11.76     | 811.6069 |           |
| PC38:4   | C46 H84 N1 O8 P1     | 10.30     | 809.5917 | 18:0-20:4 |
| PC38:6   | C46 H80 N1 O8 P1     | 8.70      | 805.5609 | 16:-22:6  |
| PCO-34:1 | C42 H84 N1 O7 P1     | 11.60     | 745.5968 |           |
| PE34:1   | C39 H76 N1 O8 P1     | 10.11     | 717.5281 |           |
| PE34:2   | C39 H74 N1 O8 P1     | 8.78      | 715.5135 |           |
| PE36:0   | C41 H82 N1 O8 P1     | 13.680211 | 747.5785 |           |
| PE36:1   | C41 H80 N1 O8 P1     | 12.24     | 745.5606 |           |
| PE36:2   | C41 H78 N1 O8 P1     | 10.82     | 743.5448 |           |
| PE36:3   | C41 H76 N1 O8 P1     | 9.49      | 741.5280 |           |
| PE36:4   | C41 H74 N1 O8 P1     | 8.10      | 739.5123 |           |
| PE38:4   | C43 H78 N1 O8 P1     | 10.93     | 767.5447 | 20:4-18:0 |
| PE40:4   | C45 H82 N1 O8 P1     | 12.70     | 795.5779 | 22:6-18:0 |
| PE40:6   | C45 H78 N1 O8 P1     | 10.68     | 791.5448 |           |
| PEO-34:2 | C39 H76 N1 O7 P1     | 11.41     | 701.5364 |           |
| PEO-36:5 | C41 H74 N1 O7 P1     | 10.06     | 723.5186 | 20:4-16:1 |
| PEO-38:5 | C43 H78 N1 O7 P1     | 12.27     | 751.5500 | 20:4-18:1 |
| PEO-38:7 | C43 H74 N1 O7 P1     | 9.90      | 747.5188 |           |
| PEO-40:7 | C45H78N1O7P1         | 11.97     | 775.5506 |           |
| PI34:2   | C43 H79 O13 P1       | 5.65      | 834.5238 |           |
| PI34:3   | C43 H77 O13 P1       | 4.95      | 832.5066 |           |
| PI36:1   | C45 H85 O13 P1       | 8.10      | 864.5600 |           |
| PI36:2   | C45 H83 O13 P1       | 6.90      | 862.5535 |           |
| PI36:3   | C45H81O13P1          | 6.17      | 860.5402 |           |
| PI36:4   | C45 H79 O13 P1       | 5.22      | 858.5222 |           |
| PI38:3   | C47 H85 O13 P1       | 7.66      | 888.5700 |           |
| PI38:4   | C47 H83 O13 P1       | 7.13      | 886.5540 |           |
| PS36:1   | C42 H80 N1 O10<br>P1 | 8.60      | 789.5497 |           |
| PS36:2   | C42 H78 N1 O10<br>P1 | 7.48      | 787.5348 |           |
| PS40:6   | C46 H78 N1 O10<br>P1 | 7.30      | 835.5341 |           |
| SMd28:1  | C33 H67 N2 O6 P1     | 3.81      | 618.4716 |           |
| SMd30:1  | C35 H71 N2 O6 P1     | 4.77      | 646.5030 |           |
| SMd32:0  | C37 H77 N2 O6 P1     | 6.53      | 676.5496 |           |

|                 |                  |       |          |                |
|-----------------|------------------|-------|----------|----------------|
| SMd32:1         | C37 H75 N2 O6 P1 | 5.98  | 674.5349 | d18:1/14:0     |
| SMd32:2         | C37 H73 N2 O6 P1 | 5.12  | 672.5187 |                |
| SMd33:1/SMt32:2 | C38 H77 N2 O6 P1 | 6.70  | 688.5500 |                |
| SMd34:0         | C39 H81 N2 O6 P1 | 8.20  | 704.5815 |                |
| SMd34:1         | C39 H79 N2 O6 P1 | 7.47  | 702.5662 | d18:1/16:0     |
| SMd34:2         | C39 H77 N2 O6 P1 | 6.50  | 700.5513 | d18:1/16:1     |
| SMd36:0         | C41 H85 N2 O6 P1 | 10.05 | 732.6125 |                |
| SMd36:1         | C41 H83 N2 O6 P1 | 9.30  | 730.5976 | d18:1/18:0     |
| SMd36:2         | C41 H81 N2 O6 P1 | 8.10  | 728.5818 |                |
| SMd38:0         | C43 H89 N2 O6 P1 | 12.65 | 760.6435 |                |
| SMd38:1         | C43 H87 N2 O6 P1 | 11.44 | 758.6288 | d18:1/20:0     |
| SMd39:0         | C44 H91 N2 O6 P1 | 13.81 | 774.6584 |                |
| SMd39:1         | C44 H89 N2 O6 P1 | 13.10 | 772.6429 |                |
| SMd39:2         | C44 H87 N2 O6 P1 | 11.48 | 770.6270 |                |
| SMd40:0         | C45 H93 N2 O6 P1 | 15.18 | 788.6742 |                |
| SMd40:1_1       | C45 H91 N2 O6 P1 | 13.83 | 786.6596 | d18:1/22:0     |
| SMd40:1_2       | C45 H91 N2 O6 P1 | 14.25 | 786.6599 |                |
| SMd40:2         | C45 H89 N2 O6 P1 | 12.10 | 784.6436 |                |
| SMd41:1         | C46 H93 N2 O6 P1 | 15.10 | 800.6759 | d18:1/23:0     |
| SMd41:2         | C46 H91 N2 O6 P1 | 13.57 | 798.6587 |                |
| SMd42:0         | C47 H97 N2 O6 P1 | 17.43 | 816.7052 |                |
| SMd42:1         | C47 H93 N2 O6 P1 | 16.37 | 814.6912 | d18:1/24:0     |
| SMd42:2         | C47 H93 N2 O6 P1 | 14.17 | 812.6753 | d18:1/24:1     |
| SMd42:3         | C47 H91 N2 O6 P1 | 12.60 | 810.6598 |                |
| SMd43:2         | C48H96N2O6P      | 15.40 | 826.6915 |                |
| SMd44:1         | C49 H99 N2 O6 P1 | 19.10 | 842.7219 |                |
| SMd44:2         | C49 H97 N2 O6 P1 | 16.80 | 840.7064 |                |
| SMt34:1         | C39 H79 N2 O7 P1 | 6.71  | 718.5599 |                |
| SMt42:1         | C47 H95 N2 O7 P1 | 12.90 | 830.6855 |                |
| TG26:0          | C29 H54 O6       | 6.64  | 498.4171 |                |
| TG28:0          | C31 H58 O6       | 8.51  | 526.4485 |                |
| TG30:0          | C33 H62 O6       | 10.82 | 554.4798 |                |
| TG30:1          | C33 H60 O6       | 9.44  | 552.4629 |                |
| TG31:0          | C34 H64 O6       | 8.52  | 568.4948 |                |
| TG32:0          | C35 H66 O6       | 13.10 | 582.5107 |                |
| TG32:1          | C35 H64 O6       | 11.68 | 580.4952 |                |
| TG33:0          | C36 H68 O6       | 14.41 | 596.5255 |                |
| TG33:1          | C37 H72 O6       | 13.00 | 594.5092 |                |
| TG34:0          | C37 H70 O6       | 15.56 | 610.5414 |                |
| TG34:1          | C37 H68 O6       | 14.00 | 608.5266 |                |
| TG34:2          | C37 H66 O6       | 12.45 | 606.5109 |                |
| TG35:0          | C38 H72 O6       | 17.00 | 624.5567 |                |
| TG36:0          | C39 H74 O6       | 18.30 | 638.5732 | 12:0-12:0-12:0 |
| TG36:1          | C39 H72 O6       | 16.75 | 636.539  |                |
| TG37:0          | C40 H76 O6       | 19.62 | 652.589  |                |
| TG38:0          | C41 H78 O6       | 20.92 | 666.6048 | 14:0-12:0-12:0 |
| TG38:1          | C41 H76 O6       | 19.46 | 664.5904 |                |
| TG38:2          | C41 H74 O6       | 17.63 | 662.5722 |                |

|        |             |       |          |                                   |
|--------|-------------|-------|----------|-----------------------------------|
| TG38:3 | C41 H72 O6  | 15.99 | 660.5578 |                                   |
| TG39:0 | C42 H80 O6  | 22.43 | 680.6189 |                                   |
| TG39:1 | C42 H78 O6  | 20.70 | 678.6042 |                                   |
| TG40:0 | C43 H82 O6  | 23.50 | 694.6362 | 14:0-12:0-14:0                    |
| TG40:1 | C43 H80 O6  | 21.83 | 692.6199 |                                   |
| TG40:2 | C43 H78 O6  | 20.25 | 690.6052 |                                   |
| TG40:3 | C43 H76 O6  | 18.77 | 688.5878 |                                   |
| TG41:0 | C44 H84 O6  | 24.88 | 708.6512 |                                   |
| TG41:1 | C44 H82 O6  | 23.31 | 706.6342 |                                   |
| TG42:0 | C45 H86 O6  | 25.98 | 722.6672 | 14:0/14:0/14:0,<br>14:0/16:0/12:0 |
| TG42:1 | C45 H84 O6  | 24.45 | 720.6518 | 12:0/14:0/16:1                    |
| TG42:2 | C45 H82 O6  | 22.76 | 718.6362 |                                   |
| TG42:3 | C45 H80 O6  | 21.13 | 716.6207 |                                   |
| TG43:0 | C46 H88 O6  | 27.16 | 736.6837 |                                   |
| TG43:1 | C46 H86 O6  | 25.76 | 734.6673 |                                   |
| TG44:0 | C47 H90 O6  | 28.32 | 750.6985 | 16:0/14:0/14:0,<br>18:0/14:0/12:0 |
| TG44:1 | C47 H88 O6  | 26.86 | 748.6829 | 18:1/16:0/10:0,<br>10:0/12:0/22:1 |
| TG44:2 | C47 H86 O6  | 25.27 | 746.6675 | 18:2/14:0/12:0                    |
| TG44:3 | C47 H84 O6  | 23.84 | 744.6511 |                                   |
| TG45:1 | C48 H90 O6  | 28.00 | 762.6981 |                                   |
| TG46:0 | C49 H94 O6  | 30.53 | 778.7294 | 16:0/14:0/16:0                    |
| TG46:1 | C49 H92 O6  | 29.12 | 776.7138 | 16:1/14:0/14:0,<br>12:0/10:0/22:1 |
| TG46:2 | C49 H90 O6  | 27.65 | 774.6987 | 18:2/16:0/12:0,<br>14:0/12:0/20:2 |
| TG46:3 | C49 H88 O6  | 26.28 | 772.6807 |                                   |
| TG46:4 | C49 H86 O6  | 24.71 | 770.6664 |                                   |
| TG47:1 | C50 H94 O6  | 30.31 | 790.729  |                                   |
| TG47:2 | C50 H92 O6  | 28.91 | 788.7117 |                                   |
| TG47:3 | C50 H90 O6  | 27.43 | 786.6961 |                                   |
| TG48:0 | C51 H98 O6  | 32.54 | 806.7603 |                                   |
| TG48:1 | C51 H96 O6  | 31.27 | 804.7461 | 18:1/16:0/14:0                    |
| TG48:2 | C51 H94 O6  | 29.72 | 802.7282 |                                   |
| TG48:3 | C51 H92 O6  | 28.45 | 800.7139 | 18:1/18:2/12:0                    |
| TG48:4 | C51 H90 O6  | 26.90 | 798.6985 | 12:0/18:1/18:3                    |
| TG48:5 | C51 H88 O6  | 25.41 | 796.6825 | 18:3/18:2/12:0                    |
| TG49:1 | C52 H98 O6  | 32.56 | 818.7591 |                                   |
| TG49:2 | C52 H96 O6  | 31.01 | 816.7441 |                                   |
| TG50:1 | C53 H100 O6 | 33.31 | 832.777  | 18:1/16:0/16:0                    |
| TG50:2 | C53 H98 O6  | 32.00 | 830.7614 | 18:1/16:0/16:1                    |
| TG50:3 | C53 H96 O6  | 30.61 | 828.7452 | 18:1/18:2/16:0                    |
| TG50:4 | C53 H94 O6  | 29.15 | 826.7295 | 18:2/18:3/18:1                    |
| TG50:5 | C53 H92 O6  | 27.78 | 824.7147 | 18:2/18:3/14:0                    |
| TG50:6 | C53 H90 O6  | 27.34 | 822.696  | 22:6/16:0/12:0                    |



|          |             |       |          |                                             |
|----------|-------------|-------|----------|---------------------------------------------|
| TG51:1   | C54 H100 O6 | 34.30 | 846.7903 |                                             |
| TG51:2   | C54 H98 O6  | 33.03 | 844.7765 | 18:1/17:1/16:0                              |
| TG51:3   | C54 H96 O6  | 31.66 | 842.7605 |                                             |
| TG51:4   | C54 H94 O6  | 30.60 | 840.7453 |                                             |
| TG52:1   | C55 H104 O6 | 35.27 | 860.8077 | 18:0/18:1/16:0                              |
| TG52:2   | C55 H102 O6 | 34.02 | 858.7925 | 18:1/16:0/18:1                              |
| TG52:3   | C55 H100 O6 | 32.70 | 856.7767 | 18:1/16:0/18:2                              |
| TG52:4   | C55 H98 O6  | 31.32 | 854.7608 | 18:2/18:2/16:0                              |
| TG52:5   | C55 H96 O6  | 29.87 | 852.745  | 18:2/18:3/16:0                              |
| TG52:6   | C55 H94 O6  | 28.56 | 850.7293 | 14:0/16:0/22:6                              |
| TG52:7   | C55 H92 O6  | 28.13 | 848.7121 | 22:6/18:1/12:0                              |
| TG53:1   | C56 H106 O6 | 36.34 | 874.8208 |                                             |
| TG53:2   | C56 H104 O6 | 35.21 | 872.8068 |                                             |
| TG53:3   | C56 H102 O6 | 33.72 | 870.7907 |                                             |
| TG53:6   | C56 H96 O6  | 29.61 | 864.7449 |                                             |
| TG54:1   | C57 H108 O6 | 37.13 | 888.8376 | 16:0/18:1/20:0                              |
| TG54:2   | C57 H106 O6 | 36.04 | 886.9232 |                                             |
| TG54:3   | C57 H104 O6 | 34.72 | 884.808  | 18:1/18:1/18:1                              |
| TG54:4   | C57 H102 O6 | 33.42 | 882.7925 | 18:1/18:1/18:2                              |
| TG54:5   | C57 H100 O6 | 32.07 | 880.7766 | 18:1/18:2/18:2,<br>18:3/18:1/18:1           |
| TG54:5_2 | C57 H100 O6 | 32.73 | 880.7763 | 20:4/18:1/16:0                              |
| TG54:6   | C57 H98 O6  | 30.66 | 878.7602 | 18:2/18:2/18:2 (FM),<br>18:1-18:2-18:3 (HM) |
| TG54:7   | C57 H96 O6  | 29.17 | 876.7424 | 18:2/18:3/18:2                              |
| TG54:7_2 | C57 H96 O6  | 30.31 | 876.7451 |                                             |
| TG54:8   | C57 H94 O6  | 27.72 | 874.7281 | 18:3/18:3/18:2                              |
| TG55:2   | C58 H108 O6 | 36.96 | 900.8392 |                                             |
| TG55:3   | C58 H106 O6 | 35.73 | 898.821  |                                             |
| TG56:1   | C59 H112 O6 | 38.96 | 916.8695 |                                             |
| TG56:2   | C59 H110 O6 | 37.74 | 914.854  |                                             |
| TG56:3   | C59 H108 O6 | 36.54 | 912.8386 | 20:1/18:1/18:1                              |
| TG56:4   | C59 H106 O6 | 35.56 | 910.8223 |                                             |
| TG56:5   | C59 H104 O6 | 34.22 | 908.8075 | 18:1/16:0/22:4                              |
| TG56:6_2 | C59 H102 O6 | 33.60 | 906.7914 | 18:1/18:1/20:4                              |
| TG56:6_1 | C59 H102 O6 | 33.03 | 906.7914 | 16:0/18:1/22:5                              |
| TG56:7_2 | C59 H100 O6 | 32.49 | 904.775  | 22:6/18:1/16:0                              |
| TG56:7_1 | C59 H100 O6 | 31.79 | 904.7757 |                                             |
| TG56:8   | C59 H98 O6  | 31.01 | 902.7599 |                                             |
| TG56:9   | C59 H96 O6  | 29.61 | 900.7456 |                                             |
| TG57:2   | C60 H112 O6 | 38.79 | 928.8691 |                                             |
| TG58:1   | C61 H112 O6 | 40.63 | 944.9016 |                                             |
| TG58:10  | C61 H98 O6  | 30.31 | 926.7591 |                                             |
| TG58:11  | C61 H96 O6  | 29.54 | 924.7444 |                                             |
| TG58:2   | C61 H114 O6 | 39.57 | 942.8862 |                                             |
| TG58:3   | C61 H112 O6 | 38.44 | 940.8701 |                                             |
| TG58:4   | C61 H110 O6 | 37.30 | 938.8531 |                                             |
| TG58:5   | C61 H108 O6 | 35.82 | 936.8375 | 22:4/18:1/18:1                              |

|                 |             |       |          |                  |
|-----------------|-------------|-------|----------|------------------|
| <b>TG58:6</b>   | C61 H106 O6 | 34.96 | 934.822  | 22:4/18:1/18:1   |
| <b>TG58:7_2</b> | C61 H104 O6 | 34.51 | 932.8052 | 22:6/18:1/18:0   |
| <b>TG58:7_1</b> | C61 H104 O6 | 33.68 | 932.807  | 22:5/18:1/18:1   |
| <b>TG58:8_1</b> | C61 H102 O6 | 33.11 | 930.7905 | 18:1/18:1/22:6   |
| <b>TG58:8_2</b> | C61 H102 O6 | 32.41 | 930.7915 |                  |
| <b>TG58:9</b>   | C61 H100 O6 | 31.79 | 928.7753 | 22:6/18:1/18:0   |
| <b>TG59:2</b>   | C62 H116 O6 | 40.35 | 956.8987 | 23:0/18:1/18:1   |
| <b>TG60:1</b>   | C63 H120 O6 | 42.20 | 972.9311 |                  |
| <b>TG60:12</b>  | C63 H98 O6  | 30.53 | 950.7604 |                  |
| <b>TG60:2</b>   | C63 H118 O6 | 41.24 | 970.916  |                  |
| <b>TG60:3</b>   | C63 H116 O6 | 40.27 | 968.9023 |                  |
| <b>TG60:4</b>   | C63 H114 O6 | 39.14 | 966.8838 |                  |
| <b>TG60:5</b>   | C63 H112 O6 | 38.09 | 964.8699 |                  |
| <b>TG60:6</b>   | C63 H110 O6 | 36.61 | 962.8534 | 22:4/18:1/20:1   |
| <b>TG61:12</b>  | C64 H100 O6 | 18.53 | 964.7694 |                  |
| <b>TG62:3</b>   | C65 H120 O6 | 41.48 | 996.9322 |                  |
| <b>TG62:4</b>   | C65 H118 O6 | 40.37 | 994.9149 |                  |
| <b>TG62:5</b>   | C65 H116 O6 | 39.32 | 992.8987 |                  |
| <b>TG62:6</b>   | C65 H114 O6 | 38.53 | 990.8852 |                  |
| <b>TG62:7</b>   | C65 H112 O6 | 37.31 | 988.8698 |                  |
| <b>TG62:8</b>   | C65 H110 O6 | 37.39 | 986.8511 |                  |
| <b>TG63:2</b>   | C66 H124 O6 | 41.19 | 1012.963 |                  |
| <b>TG63:6</b>   | C66 H116 O6 | 42.55 | 998.9437 |                  |
| <b>TG64:4</b>   | C67 H122 O6 | 41.85 | 1022.947 |                  |
| <b>TG64:6</b>   | C67 H118 O6 | 40.10 | 1018.916 |                  |
| <b>TG64:8</b>   | C67 H114 O6 | 39.23 | 1014.884 |                  |
| <b>TG66:18</b>  | C69 H98 O6  | 29.42 | 1022.757 | 22:6/22:6/22:6   |
| <b>TGO-50:1</b> | C53 H102 O5 | 35.85 | 818.7943 |                  |
| <b>TGO-52:1</b> | C55 H106 O5 | 37.73 | 846.826  |                  |
| <b>TGO-52:2</b> | C55 H104 O5 | 36.50 | 844.8121 | O-18:1-18:1-16:0 |
| <b>TGO-54:2</b> | C57 H108 O5 | 38.27 | 872.843  |                  |
| <b>TGO-54:3</b> | C57 H106 O5 | 37.13 | 870.8291 |                  |
| <b>TGO-58:2</b> | C61 H116 O5 | 41.60 | 928.9016 |                  |

<sup>a</sup> measured mass calculated based on m/z value of observed ions on MS spectrum, [M+H]<sup>+</sup> for SMs, PCs, PEs, PSs, PIs, [M+NH<sub>4</sub>]<sup>+</sup> for TGs, [M+Na]<sup>+</sup> for DGs and MGs. DG, diacylglycerol; MG, monoacylglycerol; PC, glycerophosphocholine; PC-O, ether analogue of glycerophosphocholine; PE, glycerophosphoethanolamine; PE-O, ether analogue of glycerophosphoethanolamine; PS, glycerophosphoserine, PI, glycerophosphoinositol; SM, sphingomyelin; TG, triacylglycerol; TGO, ether analogue of triacylglycerol.

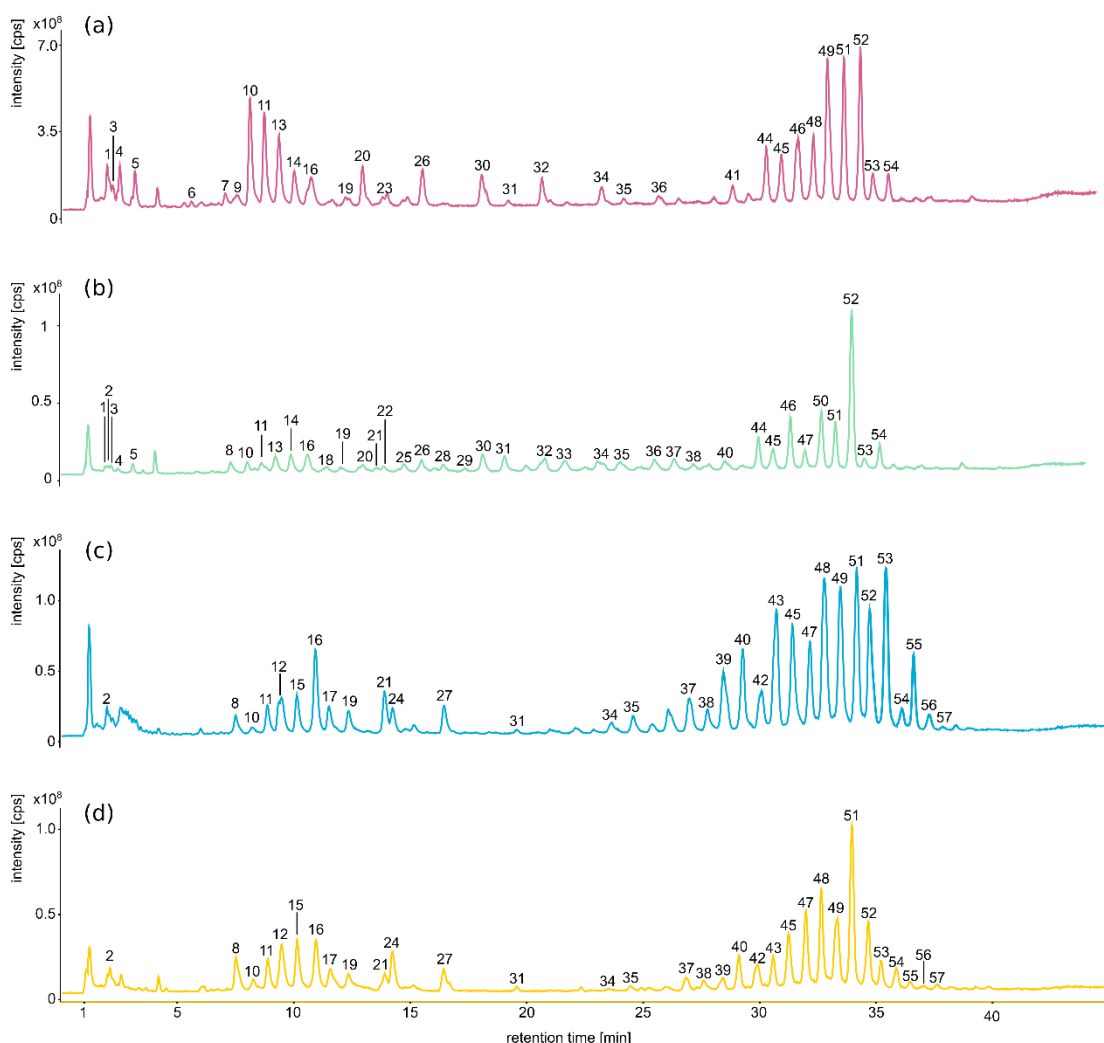

| No. | Lipid        | No. | Lipid     | No. | Lipid     | No. | Lipid   | No. | Lipid   | No. | Lipid   |
|-----|--------------|-----|-----------|-----|-----------|-----|---------|-----|---------|-----|---------|
| 1   | lyso PC 18:0 | 11  | PC 34:2   | 21  | SM d:40:1 | 31  | TG 38:1 | 41  | TG 54:7 | 51  | TG 52:2 |
| 2   | lyso PC 16:0 | 12  | PC 32:0   | 22  | TG 34:1   | 32  | TG 38:0 | 42  | TG 48:2 | 52  | TG 54:3 |
| 3   | lyso PC 18:1 | 13  | PC 36:3   | 23  | DG 34:1   | 33  | TG 40:1 | 43  | TG 50:3 | 53  | TG 52:1 |
| 4   | MG 16:0      | 14  | PC 34:1   | 24  | SM d:42:2 | 34  | TG 40:0 | 44  | TG 54:6 | 54  | TG 54:2 |
| 5   | MG 18:0      | 15  | SM 32:1   | 25  | SM 41:1   | 35  | TG 42:1 | 45  | TG 52:4 | 55  | TG 56:3 |
| 6   | PI 34:2      | 16  | PC 36:2   | 26  | TG 34:0   | 36  | TG 42:0 | 46  | TG 54:5 | 56  | TG 58:4 |
| 7   | PC 36:5      | 17  | SM d:38:1 | 27  | SM 42:1   | 37  | TG 44:1 | 47  | TG 50:2 | 57  | TG 56:2 |
| 8   | Sm d:34:1    | 18  | TG 32:1   | 28  | TG 36:1   | 38  | TG 46:2 | 48  | TG 52:3 |     |         |
| 9   | PC 30:0      | 19  | PC 36:1   | 29  | TG 38:2   | 39  | TG 48:3 | 49  | TG 50:1 |     |         |
| 10  | PC 36:4      | 20  | TG 32:0   | 30  | TG 36:0   | 40  | TG 46:1 | 50  | TG 54:4 |     |         |

Figure S2. The total ion chromatograms (TICs) of the lipid extracts of the FM 4.2 (a), FM 3.1 (b), mature HM – W.13.3 (c), and colostrum HM – W.24.0 (d) samples analysed using RP-LC-Q-TOF-MS in the positive ionisation mode. Number corresponds to the identified lipids based on m/z value and interpretation of MS/MS spectra. DG, diacylglycerol; MG, monoacylglycerol; PC, glycerophosphocholine; PC-O, ether analogue of glycerophosphocholine; PE, glycerophosphoethanolamine; PE-O, ether analogue of glycerophosphoethanolamine; PS, glycerophosphoserine, PI, glycerophosphoinositol; SM, sphingomyelin; TG, triacylglycerol; TGO, ether analogue of triacylglycerol.

**Table S3. The % relative amount of lipid species within specific class of lipids in colostrum samples. The average value calculated for extraction duplicates is shown. The empty space indicate that lipid specie was below the specified threshold (% contribution within class was lower than 1%, this include not detected species)**

| <b>Compound</b>   | <b>W.16.0</b> | <b>W.17.0</b> | <b>W.18.0</b> | <b>W.19.0</b> | <b>W.20.0</b> | <b>W.21.0</b> | <b>W.22.0</b> | <b>W.23.0</b> | <b>W.24.0</b> | <b>W.25.0</b> | <b>W.26.0</b> |
|-------------------|---------------|---------------|---------------|---------------|---------------|---------------|---------------|---------------|---------------|---------------|---------------|
| <b>PC</b>         |               |               |               |               |               |               |               |               |               |               |               |
| <b>LysoPC16:0</b> | 5%            | 8%            | 8%            | 4%            | 6%            | 4%            | 4%            | 4%            | 4%            | 3%            | 3%            |
| <b>LysoPC18:0</b> | 2%            | 3%            | 4%            | 2%            | 3%            |               | 2%            | 1%            | 3%            | 1%            | 1%            |
| <b>LysoPC18:1</b> | 4%            | 2%            | 4%            | 2%            | 3%            | 3%            | 2%            | 2%            |               | 2%            | 2%            |
| <b>LysoPC18:2</b> | 3%            | 2%            | 4%            | 3%            | 2%            | 2%            | 3%            | 3%            | 2%            | 1%            | 1%            |
| <b>PC30:0</b>     | 2%            | 3%            | 4%            | 4%            | 2%            | 3%            | 2%            | 3%            | 4%            | 2%            | 2%            |
| <b>PC32:0</b>     | 14%           | 27%           | 14%           | 11%           | 15%           | 13%           | 15%           | 16%           | 13%           | 16%           | 18%           |
| <b>PC32:1</b>     | 2%            |               | 2%            | 2%            | 2%            | 2%            | 1%            | 2%            | 1%            | 2%            | 1%            |
| <b>PC34:0</b>     | 4%            | 10%           | 6%            | 6%            | 6%            | 6%            | 6%            | 5%            | 6%            | 5%            | 6%            |
| <b>PC34:1</b>     | 25%           | 14%           | 19%           | 18%           | 23%           | 22%           | 18%           | 19%           | 19%           | 25%           | 27%           |
| <b>PC34:2</b>     | 10%           | 5%            | 9%            | 11%           | 9%            | 8%            | 12%           | 11%           | 11%           | 12%           | 8%            |
| <b>PC36:1</b>     | 6%            | 4%            | 4%            | 5%            | 5%            | 7%            | 4%            | 4%            | 5%            | 5%            | 7%            |
| <b>PC36:2</b>     | 13%           | 13%           | 13%           | 17%           | 13%           | 17%           | 18%           | 17%           | 19%           | 14%           | 13%           |
| <b>PC36:3</b>     | 4%            | 2%            | 4%            | 6%            | 4%            | 5%            | 7%            | 7%            | 6%            | 5%            | 3%            |
| <b>PC36:4</b>     |               |               |               |               |               |               | 1%            | 1%            | 1%            |               |               |
| <b>PCO-34:1</b>   | 3%            | 3%            | 3%            | 2%            | 3%            | 3%            | 2%            | 2%            | 2%            | 3%            | 5%            |
| <b>PE</b>         |               |               |               |               |               |               |               |               |               |               |               |
| <b>LysoPE18:0</b> |               | 1%            | 3%            |               | 3%            | 1%            |               |               | 2%            |               |               |
| <b>LysoPE18:1</b> | 9%            | 11%           | 10%           | 5%            | 9%            | 5%            | 4%            | 4%            | 5%            | 5%            | 4%            |
| <b>PE34:1</b>     | 3%            | 2%            | 2%            | 2%            | 3%            | 2%            | 4%            | 3%            | 2%            | 3%            | 1%            |
| <b>PE34:2</b>     |               |               |               | 1%            |               |               | 1%            | 1%            | 1%            | 1%            |               |
| <b>PE36:1</b>     | 6%            | 6%            | 6%            | 6%            | 6%            | 6%            | 4%            | 5%            | 6%            | 6%            | 8%            |
| <b>PE36:2</b>     | 11%           |               | 16%           | 21%           | 9%            | 13%           | 15%           | 14%           | 14%           | 16%           | 13%           |
| <b>PE36:3</b>     | 4%            | 2%            | 4%            | 6%            | 2%            | 3%            | 7%            | 7%            | 4%            | 5%            | 2%            |
| <b>PE38:4</b>     | 48%           | 46%           | 40%           | 41%           | 45%           | 47%           | 49%           | 47%           | 50%           | 46%           | 42%           |
| <b>PE40:6</b>     |               | 1%            |               | 3%            | 1%            | 6%            | 3%            | 3%            | 1%            | 1%            |               |

|                  |     |     |     |     |     |     |     |     |     |     |     |
|------------------|-----|-----|-----|-----|-----|-----|-----|-----|-----|-----|-----|
| <b>PEO-34:2</b>  | 3%  | 5%  | 3%  | 2%  | 3%  | 2%  | 2%  | 2%  | 2%  | 2%  | 4%  |
| <b>PEO-36:5</b>  | 7%  | 13% | 8%  | 6%  | 10% | 7%  | 6%  | 7%  | 7%  | 8%  | 11% |
| <b>PEO-38:5</b>  | 5%  | 6%  | 4%  | 3%  | 5%  | 4%  | 3%  | 3%  | 3%  | 4%  | 9%  |
| <b>PEO-38:7</b>  | 2%  | 3%  | 1%  | 2%  | 2%  |     | 1%  | 1%  | 1%  | 1%  | 2%  |
| <b>SM</b>        |     |     |     |     |     |     |     |     |     |     |     |
| <b>SMd32:1</b>   | 3%  | 1%  | 2%  | 3%  | 2%  | 2%  | 2%  | 2%  | 3%  | 2%  | 2%  |
| <b>SMd34:1</b>   | 36% | 19% | 22% | 19% | 33% | 30% | 23% | 21% | 24% | 31% | 33% |
| <b>SMd36:0</b>   |     |     |     |     |     |     |     |     |     | 1%  |     |
| <b>SMd36:1</b>   | 6%  | 13% | 9%  | 12% | 7%  | 8%  | 10% | 11% | 4%  | 8%  | 7%  |
| <b>SMd36:2</b>   | 2%  |     | 1%  | 1%  | 1%  | 1%  | 1%  | 1%  |     | 1%  |     |
| <b>SMd38:1</b>   | 6%  | 10% | 9%  | 8%  | 5%  | 6%  | 7%  | 8%  | 6%  | 7%  | 7%  |
| <b>SMd40:1_1</b> | 9%  | 15% | 15% | 13% | 9%  | 9%  | 12% | 13% | 13% | 10% | 13% |
| <b>SMd40:1_2</b> | 3%  |     | 1%  | 1%  | 2%  | 1%  | 1%  | 1%  | 1%  |     | 2%  |
| <b>SMd40:2</b>   | 1%  | 1%  | 3%  | 3%  | 2%  | 2%  | 1%  | 3%  | 1%  | 1%  | 1%  |
| <b>SMd41:1</b>   | 3%  | 4%  | 4%  | 3%  | 3%  | 3%  | 3%  | 3%  | 3%  | 3%  | 3%  |
| <b>SMd42:2</b>   | 21% | 28% | 25% | 29% | 26% | 28% | 31% | 29% | 34% | 21% | 22% |
| <b>SMd42:3</b>   | 3%  | 2%  | 3%  | 3%  | 4%  | 4%  | 4%  | 3%  | 4%  | 3%  | 3%  |
| <b>TG</b>        |     |     |     |     |     |     |     |     |     |     |     |
| <b>TG42:0</b>    |     |     |     | 2%  |     |     |     |     | 1%  |     |     |
| <b>TG42:1</b>    |     |     |     | 2%  |     |     |     |     | 1%  |     |     |
| <b>TG44:0</b>    |     |     | 1%  | 2%  |     |     |     |     |     |     |     |
| <b>TG44:1</b>    | 1%  | 2%  | 2%  | 4%  |     | 1%  | 2%  | 3%  | 2%  |     | 1%  |
| <b>TG44:2</b>    |     |     |     | 1%  |     |     |     |     |     |     |     |
| <b>TG46:1</b>    | 3%  | 3%  | 5%  | 7%  | 2%  | 3%  | 4%  | 5%  | 3%  | 3%  | 3%  |
| <b>TG46:2</b>    | 1%  | 1%  | 2%  | 2%  |     | 1%  | 2%  | 2%  | 1%  |     |     |
| <b>TG48:1</b>    | 4%  | 3%  | 5%  | 5%  | 4%  | 3%  | 3%  | 4%  | 4%  | 4%  | 5%  |
| <b>TG48:2</b>    | 3%  | 3%  | 3%  | 4%  | 2%  | 3%  | 2%  | 3%  | 4%  | 2%  | 2%  |
| <b>TG48:3</b>    |     | 1%  | 1%  | 2%  |     | 1%  | 1%  | 2%  | 2%  |     |     |
| <b>TG50:1</b>    | 7%  | 7%  | 7%  | 6%  | 7%  | 6%  | 7%  | 6%  | 5%  | 9%  | 9%  |
| <b>TG50:2</b>    | 6%  | 9%  | 8%  | 8%  | 8%  | 7%  | 8%  | 8%  | 7%  | 8%  | 8%  |
| <b>TG50:3</b>    | 2%  | 3%  | 3%  | 3%  | 3%  | 2%  | 3%  | 3%  | 3%  | 2%  | 2%  |

|        |     |     |     |     |     |     |     |     |     |     |     |
|--------|-----|-----|-----|-----|-----|-----|-----|-----|-----|-----|-----|
| TG52:1 | 6%  | 3%  | 4%  | 3%  | 4%  | 4%  | 3%  | 3%  | 2%  | 5%  | 6%  |
| TG52:2 | 19% | 22% | 20% | 17% | 23% | 20% | 20% | 19% | 17% | 23% | 20% |
| TG52:3 | 9%  | 13% | 9%  | 9%  | 11% | 10% | 12% | 12% | 11% | 10% | 9%  |
| TG52:4 | 2%  | 4%  | 2%  | 2%  | 3%  | 3%  | 3%  | 3%  | 4%  | 2%  | 2%  |
| TG54:2 | 4%  | 2%  | 3%  | 2%  | 3%  | 4%  | 2%  | 2%  | 3%  | 3%  | 4%  |
| TG54:3 | 8%  | 5%  | 6%  | 5%  | 8%  | 9%  | 6%  | 5%  | 8%  | 8%  | 8%  |
| TG54:4 | 5%  | 4%  | 4%  | 3%  | 5%  | 5%  | 4%  | 4%  | 6%  | 5%  | 4%  |
| TG54:5 | 2%  | 2%  | 1%  | 1%  | 2%  | 2%  | 2%  | 1%  | 3%  | 2%  | 2%  |

DG, diacylglycerol; MG, monoacylglycerol; PC, glycerophosphocholine; PC-O, ether analogue of glycerophosphocholine; PE, glycerophosphoethanolamine; PE-O, ether analogue of glycerophosphoethanolamine; PS, glycerophosphoserine, PI, glycerophosphoinositol; SM, sphingomyelin; TG, triacylglycerol; TGO, ether analogue of triacylglycerol.

**Table S4. The % relative amount of lipid species within specific class of lipids in HM samples collected between 0 and 6 months. The average value calculated for extraction duplicates is shown. The empty space indicate that lipid specie was below the specified threshold (% contribution within class was lower than 1%, this include not detected species)**

| Compound    | W.1.1(4M).E | W.1.1(4M).M | W.1.1.E | W.1.1.M | W.12.1.E | W.12.1.M | W.2.1.E | W.2.1.M | W.5.1.E | W.5.1.M |
|-------------|-------------|-------------|---------|---------|----------|----------|---------|---------|---------|---------|
| PC          |             |             |         |         |          |          |         |         |         |         |
| LysoPC16:0  | 3%          | 4%          | 4%      | 3%      | 3%       | 4%       | 3%      | 3%      | 3%      | 6%      |
| Lyso-PC18:0 | 2%          | 2%          | 2%      | 1%      | 3%       | 2%       | 2%      | 2%      | 2%      | 4%      |
| LysoPC18:1  | 2%          | 2%          | 3%      | 2%      | 2%       | 2%       | 2%      | 2%      | 2%      | 3%      |
| LysoPC18:2  | 4%          | 5%          | 6%      | 3%      | 6%       | 6%       | 5%      | 7%      | 7%      | 12%     |
| PC30:0      | 1%          | 1%          | 1%      | 1%      | 2%       | 2%       |         |         | 1%      | 1%      |
| PC32:0      | 8%          | 8%          | 8%      | 8%      | 7%       | 8%       | 6%      | 6%      | 7%      | 8%      |
| PC32:1      | 1%          | 1%          | 1%      | 1%      |          | 1%       |         |         |         |         |
| PC34:0      | 4%          | 4%          | 3%      | 4%      | 4%       | 4%       | 4%      | 4%      | 3%      | 3%      |
| PC34:1      | 17%         | 17%         | 18%     | 20%     | 15%      | 15%      | 13%     | 12%     | 13%     | 11%     |
| PC34:2      | 11%         | 11%         | 12%     | 11%     | 13%      | 12%      | 13%     | 13%     | 13%     | 11%     |
| PC36:1      | 5%          | 4%          | 4%      | 5%      | 4%       | 4%       | 4%      | 3%      | 3%      | 2%      |
| PC36:2      | 28%         | 26%         | 23%     | 25%     | 26%      | 27%      | 31%     | 30%     | 29%     | 25%     |
| PC36:3      | 10%         | 10%         | 9%      | 9%      | 9%       | 8%       | 10%     | 10%     | 11%     | 8%      |

|                   |     |     |     |     |           |     |     |     |     |     |
|-------------------|-----|-----|-----|-----|-----------|-----|-----|-----|-----|-----|
| <b>PC36:4</b>     |     | 2%  | 2%  | 1%  | 2%        | 1%  | 3%  | 2%  | 2%  | 2%  |
| <b>PCO-34:1</b>   | 1%  | 1%  | 1%  | 1%  |           | 1%  |     |     |     |     |
|                   |     |     |     |     | <b>PE</b> |     |     |     |     |     |
| <b>LysoPE18:1</b> | 2%  | 3%  | 4%  | 4%  | 2%        | 4%  | 2%  | 3%  | 3%  | 5%  |
| <b>LysoPE18:2</b> |     |     |     | 1%  | 1%        | 2%  |     |     | 2%  | 2%  |
| <b>PE34:1</b>     | 3%  | 3%  | 3%  | 3%  | 2%        | 2%  | 2%  | 3%  | 2%  | 2%  |
| <b>PE34:2</b>     | 1%  | 1%  | 1%  |     | 1%        | 1%  | 2%  | 2%  | 1%  | 1%  |
| <b>PE36:1</b>     | 6%  | 5%  | 6%  | 5%  | 4%        | 4%  | 5%  | 5%  | 3%  | 4%  |
| <b>PE36:2</b>     | 25% | 23% | 27% | 21% | 26%       | 24% | 27% | 25% | 22% | 26% |
| <b>PE36:3</b>     | 8%  | 7%  | 9%  | 8%  | 10%       | 6%  | 8%  | 9%  | 9%  | 9%  |
| <b>PE38:4</b>     | 45% | 43% | 41% | 51% | 45%       | 50% | 46% | 44% | 50% | 42% |
| <b>PE40:6</b>     |     | 5%  |     |     | 2%        |     |     | 2%  | 5%  | 3%  |
| <b>PEO-34:2</b>   | 2%  | 1%  | 1%  | 1%  |           |     |     |     |     |     |
| <b>PEO-36:5</b>   | 3%  | 3%  | 3%  | 2%  | 2%        | 2%  | 2%  | 2%  | 1%  | 1%  |
| <b>PEO-38:5</b>   | 2%  | 2%  | 2%  | 2%  | 1%        | 1%  | 1%  | 1%  |     |     |
| <b>PEO-38:7</b>   |     |     |     |     |           |     |     |     |     |     |
|                   |     |     |     |     | <b>SM</b> |     |     |     |     |     |
| <b>SMd32:1</b>    | 2%  | 2%  | 2%  | 2%  | 3%        | 3%  | 2%  | 2%  | 3%  | 3%  |
| <b>SMd34:1</b>    | 10% | 10% | 10% | 10% | 9%        | 12% | 11% | 10% | 10% | 11% |
| <b>SMd36:0</b>    | 1%  | 1%  | 1%  |     | 1%        | 1%  | 1%  | 2%  | 1%  | 1%  |
| <b>SMd36:1</b>    | 16% | 16% | 18% | 17% | 18%       | 17% | 15% | 16% | 14% | 13% |
| <b>SMd36:2</b>    |     |     |     |     |           | 1%  |     |     |     |     |
| <b>SMd38:1</b>    | 13% | 13% | 13% | 12% | 14%       | 12% | 12% | 12% | 14% | 11% |
| <b>SMd40:1_1</b>  | 27% | 26% | 28% | 29% | 28%       | 25% | 24% | 26% | 28% | 31% |
| <b>SMd40:1_2</b>  |     |     |     |     |           |     |     | 2%  |     | 2%  |
| <b>SMd40:2</b>    | 1%  |     | 1%  | 2%  | 2%        | 3%  | 2%  | 1%  | 2%  | 2%  |
| <b>SMd41:1</b>    | 3%  | 4%  | 4%  | 5%  | 4%        | 4%  | 5%  | 4%  | 5%  | 5%  |
| <b>SMd42:2</b>    | 21% | 21% | 18% | 18% | 17%       | 17% | 23% | 21% | 18% | 15% |
| <b>SMd42:3</b>    | 1%  | 1%  | 1%  |     |           | 2%  | 2%  | 1%  |     |     |
|                   |     |     |     |     | <b>TG</b> |     |     |     |     |     |
| <b>TG40:0</b>     |     |     |     |     | 1%        | 1%  |     |     |     | 2%  |

|        |     |     |     |     |     |     |     |     |     |     |
|--------|-----|-----|-----|-----|-----|-----|-----|-----|-----|-----|
| TG42:0 |     |     |     |     | 1%  | 2%  |     | 1%  | 1%  | 2%  |
| TG42:1 | 2%  | 2%  | 2%  | 2%  | 2%  | 2%  | 2%  | 2%  | 2%  | 2%  |
| TG44:0 |     |     |     |     | 1%  | 2%  |     | 1%  | 1%  | 3%  |
| TG44:1 | 3%  | 3%  | 3%  | 3%  | 4%  | 4%  | 3%  | 3%  | 3%  | 4%  |
| TG44:2 | 1%  | 2%  | 1%  |     | 1%  | 1%  | 2%  | 2%  | 1%  | 1%  |
| TG46:1 | 4%  | 4%  | 4%  | 3%  | 5%  | 6%  | 3%  | 4%  | 4%  | 6%  |
| TG46:2 | 3%  | 3%  | 3%  | 3%  | 3%  | 3%  | 3%  | 3%  | 3%  | 3%  |
| TG48:1 | 3%  | 2%  | 3%  | 3%  | 4%  | 5%  | 2%  | 3%  | 3%  | 5%  |
| TG48:2 | 3%  | 2%  | 3%  | 4%  | 4%  | 5%  | 3%  | 3%  | 3%  | 4%  |
| TG48:3 | 2%  | 3%  | 2%  | 2%  | 2%  | 2%  | 3%  | 2%  | 2%  | 2%  |
| TG50:1 | 5%  | 2%  | 4%  | 3%  | 4%  | 6%  | 3%  | 4%  | 3%  | 6%  |
| TG50:2 | 7%  | 5%  | 8%  | 6%  | 6%  | 8%  | 6%  | 7%  | 5%  | 6%  |
| TG50:3 | 3%  | 3%  | 3%  | 2%  | 3%  | 3%  | 3%  | 3%  | 3%  | 2%  |
| TG52:1 | 3%  | 1%  | 2%  | 3%  | 4%  | 4%  | 3%  | 3%  | 3%  | 6%  |
| TG52:2 | 14% | 14% | 15% | 17% | 15% | 17% | 14% | 15% | 15% | 14% |
| TG52:3 | 12% | 14% | 12% | 9%  | 10% | 9%  | 13% | 13% | 9%  | 7%  |
| TG52:4 | 4%  | 5%  | 4%  | 3%  | 3%  | 2%  | 5%  | 5%  | 3%  | 2%  |
| TG54:2 | 2%  | 1%  | 2%  | 3%  | 2%  | 2%  | 1%  | 1%  | 2%  | 2%  |
| TG54:3 | 7%  | 5%  | 7%  | 13% | 5%  | 4%  | 5%  | 4%  | 7%  | 5%  |
| TG54:4 | 6%  | 6%  | 5%  | 7%  | 5%  | 3%  | 6%  | 4%  | 7%  | 4%  |
| TG54:5 | 3%  | 4%  | 2%  | 2%  | 3%  | 1%  | 4%  | 3%  | 4%  | 2%  |

DG, diacylglycerol; MG, monoacylglycerol; PC, glycerophosphocholine; PC-O, ether analogue of glycerophosphocholine; PE, glycerophosphoethanolamine; PE-O, ether analogue of glycerophosphoethanolamine; PS, glycerophosphoserine, PI, glycerophosphoinositol; SM, sphingomyelin; TG, triacylglycerol; TGO, ether analogue of triacylglycerol.

**Table S5. The % relative amount of lipid species within specific class of lipids in HM samples collected between 6 and 12 months. The average value calculated for extraction duplicates is shown. The empty space indicate that lipid specie was below the specified threshold (% contribution within class was lower than 1%, this include not detected species)**

| Compound | W.15.2.E | W.15.2.M | W.4.2.E | W.6.2.(10M).M | W.6.2.(10M).M2 | W.6.2.(8M).M | W.6.2.(8M).M2 |
|----------|----------|----------|---------|---------------|----------------|--------------|---------------|
| PC       |          |          |         |               |                |              |               |



|                    |     |     |     |           |     |     |     |
|--------------------|-----|-----|-----|-----------|-----|-----|-----|
| <b>LysoPC16:0</b>  | 3%  | 3%  | 4%  | 4%        | 5%  | 4%  | 3%  |
| <b>Lyso-PC18:0</b> | 2%  | 3%  | 3%  | 2%        | 2%  | 2%  | 2%  |
| <b>Lyso-PC18:1</b> | 2%  | 2%  | 1%  | 3%        | 3%  | 1%  | 2%  |
| <b>Lyso-PC18:2</b> | 6%  | 6%  | 7%  | 6%        | 8%  | 7%  | 5%  |
| <b>PC30:0</b>      | 2%  | 2%  | 1%  | 2%        | 1%  | 2%  | 2%  |
| <b>PC32:0</b>      | 7%  | 6%  | 6%  | 9%        | 8%  | 8%  | 8%  |
| <b>PC32:1</b>      | 1%  | 1%  | 1%  | 1%        | 1%  | 1%  | 1%  |
| <b>PC34:0</b>      | 3%  | 3%  | 4%  | 4%        | 4%  | 4%  | 4%  |
| <b>PC34:1</b>      | 13% | 12% | 14% | 18%       | 17% | 13% | 17% |
| <b>PC34:2</b>      | 14% | 13% | 11% | 14%       | 14% | 13% | 13% |
| <b>PC36:1</b>      | 4%  | 4%  | 3%  | 2%        | 3%  | 2%  | 3%  |
| <b>PC36:2</b>      | 29% | 31% | 28% | 21%       | 21% | 25% | 24% |
| <b>PC36:3</b>      | 8%  | 9%  | 11% | 9%        | 8%  | 11% | 10% |
| <b>PC36:4</b>      | 1%  | 1%  | 2%  | 1%        |     | 2%  | 2%  |
| <b>PCO-34:1</b>    |     |     | 1%  | 1%        | 1%  | 1%  | 1%  |
|                    |     |     |     | <b>PE</b> |     |     |     |
| <b>Lyso-PE18:0</b> |     | 1%  |     |           | 1%  |     |     |
| <b>Lyso-PE18:1</b> | 3%  | 3%  | 4%  | 5%        | 7%  | 5%  | 4%  |
| <b>LYsoPE18:2</b>  | 1%  | 1%  | 2%  | 2%        | 3%  | 2%  | 1%  |
| <b>PE34:1</b>      | 2%  | 1%  | 2%  | 3%        | 2%  | 2%  | 2%  |
| <b>PE34:2</b>      | 2%  | 2%  | 1%  | 2%        | 1%  |     | 1%  |
| <b>PE36:1</b>      | 4%  | 4%  | 5%  | 5%        | 4%  | 4%  | 4%  |
| <b>PE36:2</b>      | 28% | 28% | 24% | 25%       | 18% | 24% | 23% |
| <b>PE36:3</b>      | 8%  | 8%  | 7%  | 10%       | 6%  | 10% | 9%  |
| <b>PE38:4</b>      | 44% | 43% | 46% | 41%       | 52% | 46% | 49% |
| <b>PE40:6</b>      | 5%  | 4%  | 2%  |           |     |     |     |
| <b>PEO-34:2</b>    |     |     | 1%  | 1%        |     |     | 1%  |
| <b>PEO-36:5</b>    | 2%  | 2%  | 2%  | 2%        | 2%  | 2%  | 2%  |
| <b>PEO-38:5</b>    | 1%  | 1%  | 1%  | 2%        | 2%  | 1%  | 1%  |
|                    |     |     |     | <b>SM</b> |     |     |     |
| <b>SMd32:1</b>     | 3%  | 3%  | 2%  | 2%        | 2%  | 2%  | 2%  |

|                  |     |     |     |     |     |     |     |
|------------------|-----|-----|-----|-----|-----|-----|-----|
| <b>SMd34:1</b>   | 10% | 11% | 9%  | 9%  | 11% | 9%  | 10% |
| <b>SMd36:0</b>   | 1%  | 2%  | 1%  | 2%  | 1%  | 1%  | 2%  |
| <b>SMd36:1</b>   | 19% | 20% | 15% | 18% | 18% | 12% | 16% |
| <b>SMd36:2</b>   |     | 1%  |     |     | 1%  |     |     |
| <b>SMd38:1</b>   | 13% | 12% | 12% | 13% | 11% | 11% | 12% |
| <b>SMd40:1_1</b> | 27% | 26% | 26% | 27% | 23% | 35% | 27% |
| <b>SMd40:2</b>   | 3%  | 1%  | 2%  | 2%  | 3%  |     |     |
| <b>SMd41:1</b>   | 4%  | 4%  | 4%  | 6%  | 6%  | 5%  | 4%  |
| <b>SMd42:2</b>   | 15% | 15% | 24% | 17% | 18% | 20% | 22% |
| <b>SMd42:3</b>   | 1%  | 1%  | 1%  | 1%  | 2%  | 1%  | 1%  |
| <b>TG</b>        |     |     |     |     |     |     |     |
| <b>TG40:0</b>    | 1%  | 2%  |     |     |     | 1%  |     |
| <b>TG42:0</b>    | 1%  | 2%  | 1%  |     |     | 2%  |     |
| <b>TG42:1</b>    | 2%  | 3%  | 2%  | 1%  |     | 3%  | 1%  |
| <b>TG44:0</b>    | 1%  | 2%  | 1%  |     |     | 1%  |     |
| <b>TG44:1</b>    | 4%  | 6%  | 3%  | 3%  | 2%  | 4%  | 3%  |
| <b>TG44:2</b>    | 1%  | 2%  | 1%  |     |     | 1%  |     |
| <b>TG46:1</b>    | 6%  | 8%  | 4%  | 5%  | 4%  | 6%  | 4%  |
| <b>TG46:2</b>    | 3%  | 4%  | 3%  | 2%  | 2%  | 3%  | 2%  |
| <b>TG48:1</b>    | 5%  | 5%  | 3%  | 4%  | 4%  | 4%  | 3%  |
| <b>TG48:2</b>    | 3%  | 4%  | 5%  | 3%  | 4%  | 5%  | 4%  |
| <b>TG48:3</b>    | 2%  | 2%  | 2%  | 2%  | 1%  | 3%  | 2%  |
| <b>TG50:1</b>    | 4%  | 4%  | 4%  | 6%  | 4%  | 4%  | 3%  |
| <b>TG50:2</b>    | 7%  | 7%  | 6%  | 8%  | 6%  | 6%  | 5%  |
| <b>TG50:3</b>    | 3%  | 3%  | 3%  | 3%  | 2%  | 3%  | 2%  |
| <b>TG52:1</b>    | 3%  | 2%  | 4%  | 3%  | 4%  | 3%  | 3%  |
| <b>TG52:2</b>    | 16% | 14% | 14% | 19% | 22% | 12% | 15% |
| <b>TG52:3</b>    | 9%  | 7%  | 9%  | 10% | 9%  | 8%  | 9%  |
| <b>TG52:4</b>    | 2%  | 2%  | 3%  | 2%  | 2%  | 2%  | 3%  |
| <b>TG54:2</b>    | 2%  | 2%  | 3%  | 3%  | 3%  | 2%  | 3%  |
| <b>TG54:3</b>    | 6%  | 4%  | 6%  | 8%  | 10% | 6%  | 11% |

|               |    |    |    |    |    |    |    |
|---------------|----|----|----|----|----|----|----|
| <b>TG54:4</b> | 4% | 2% | 5% | 4% | 6% | 5% | 8% |
| <b>TG54:5</b> | 2% |    | 3% | 1% | 2% | 3% | 4% |

DG, diacylglycerol; MG, monoacylglycerol; PC, glycerophosphocholine; PC-O, ether analogue of glycerophosphocholine; PE, glycerophosphoethanolamine; PE-O, ether analogue of glycerophosphoethanolamine; PS, glycerophosphoserine, PI, glycerophosphoinositol; SM, sphingomyelin; TG, triacylglycerol; TGO, ether analogue of triacylglycerol.

**Table S6. The % relative amount of lipid species within specific class of lipids in HM samples collected samples collected after 12 months. The average value calculated for extraction duplicates is shown The empty space indicate that lipid specie was below the specified threshold (% contribution within class was lower than 1%, this include not detected species)**

| <b>Compound</b>    | <b>W.10.3.<br/>E</b> | <b>W.10.3.<br/>M</b> | <b>W.11.3.<br/>E</b> | <b>W.11.3.<br/>M</b> | <b>W.13.<br/>3.</b> | <b>W.13.3.<br/>R</b> | <b>W.14.3.<br/>M</b> | <b>W.3.3.<br/>E</b> | <b>W.3.3.<br/>M</b> | <b>W.7.3.<br/>E</b> | <b>W.7.3.<br/>M</b> | <b>W.8.3.<br/>E</b> | <b>W.8.3.<br/>M</b> | <b>W.9.3.<br/>E</b> | <b>W.9.3.<br/>M</b> |
|--------------------|----------------------|----------------------|----------------------|----------------------|---------------------|----------------------|----------------------|---------------------|---------------------|---------------------|---------------------|---------------------|---------------------|---------------------|---------------------|
|                    |                      |                      |                      |                      |                     |                      | <b>PC</b>            |                     |                     |                     |                     |                     |                     |                     |                     |
| <b>LysoPC16:0</b>  | 7%                   | 3%                   | 4%                   | 3%                   | 3%                  | 3%                   | 4%                   | 4%                  | 5%                  | 3%                  | 3%                  | 4%                  | 4%                  | 4%                  | 3%                  |
| <b>Lyso-PC18:0</b> | 6%                   | 3%                   | 3%                   | 3%                   | 3%                  | 3%                   | 2%                   | 6%                  | 6%                  | 2%                  | 2%                  | 2%                  | 2%                  | 5%                  | 4%                  |
| <b>Lyso-PC18:1</b> | 2%                   |                      | 1%                   | 3%                   | 3%                  | 3%                   | 2%                   | 3%                  | 4%                  | 2%                  | 2%                  | 1%                  | 1%                  | 3%                  |                     |
| <b>Lyso-PC18:2</b> | 10%                  | 5%                   | 6%                   | 5%                   | 6%                  | 7%                   | 6%                   | 3%                  | 5%                  | 6%                  | 7%                  | 6%                  | 6%                  | 4%                  | 4%                  |
| <b>PC30:0</b>      | 2%                   | 2%                   | 1%                   | 1%                   | 1%                  | 1%                   |                      | 2%                  | 2%                  | 1%                  | 2%                  | 1%                  |                     | 2%                  | 1%                  |
| <b>PC32:0</b>      | 6%                   | 7%                   | 6%                   | 6%                   | 4%                  | 4%                   | 7%                   | 6%                  | 5%                  | 5%                  | 6%                  | 8%                  | 8%                  | 6%                  | 5%                  |
| <b>PC32:1</b>      |                      | 1%                   | 1%                   | 1%                   |                     |                      |                      |                     | 1%                  |                     | 1%                  |                     |                     | 1%                  | 1%                  |
| <b>PC34:0</b>      | 3%                   | 3%                   | 3%                   | 3%                   | 2%                  | 2%                   | 4%                   | 2%                  | 2%                  | 4%                  | 4%                  | 3%                  | 3%                  | 3%                  | 3%                  |
| <b>PC34:1</b>      | 12%                  | 16%                  | 16%                  | 15%                  | 16%                 | 16%                  | 16%                  | 19%                 | 17%                 | 14%                 | 11%                 | 18%                 | 18%                 | 18%                 | 19%                 |
| <b>PC34:2</b>      | 12%                  | 13%                  | 13%                  | 11%                  | 12%                 | 12%                  | 13%                  | 15%                 | 14%                 | 10%                 | 11%                 | 16%                 | 16%                 | 12%                 | 13%                 |
| <b>PC36:1</b>      | 4%                   | 5%                   | 6%                   | 6%                   | 6%                  | 7%                   | 3%                   | 6%                  | 6%                  | 4%                  | 4%                  | 3%                  | 3%                  | 6%                  | 6%                  |
| <b>PC36:2</b>      | 23%                  | 27%                  | 25%                  | 29%                  | 27%                 | 28%                  | 25%                  | 21%                 | 21%                 | 30%                 | 31%                 | 22%                 | 22%                 | 23%                 | 26%                 |
| <b>PC36:3</b>      | 7%                   | 9%                   | 9%                   | 9%                   | 9%                  | 8%                   | 11%                  | 7%                  | 7%                  | 10%                 | 9%                  | 9%                  | 8%                  | 7%                  | 8%                  |
| <b>PC36:4</b>      | 2%                   | 2%                   | 2%                   | 2%                   | 2%                  | 1%                   | 2%                   | 2%                  | 2%                  | 2%                  | 2%                  | 2%                  | 2%                  | 1%                  | 2%                  |
| <b>PCO-34:1</b>    |                      |                      | 1%                   | 1%                   |                     |                      | 1%                   |                     |                     | 1%                  | 1%                  |                     |                     |                     |                     |

| <b>PE</b>          |     |     |     |     |     |     |     |     |     |     |     |     |     |     |     |
|--------------------|-----|-----|-----|-----|-----|-----|-----|-----|-----|-----|-----|-----|-----|-----|-----|
| <b>Lyso-PE18:0</b> | 2%  | 1%  | 2%  | 1%  |     |     |     | 5%  | 5%  |     |     | 1%  | 1%  | 5%  | 2%  |
| <b>Lyso-PE18:1</b> | 7%  | 3%  | 4%  |     | 2%  | 2%  | 3%  | 3%  | 4%  | 3%  | 3%  | 5%  | 5%  | 4%  | 3%  |
| <b>LYsoPE18:2</b>  | 2%  | 1%  | 1%  | 1%  |     | 1%  | 1%  |     |     | 1%  | 1%  | 1%  | 2%  | 1%  |     |
| <b>PE34:1</b>      | 2%  | 2%  | 2%  | 2%  | 2%  | 2%  | 2%  | 3%  | 2%  | 2%  | 2%  | 2%  | 2%  | 3%  | 2%  |
| <b>PE34:2</b>      | 2%  | 2%  | 1%  | 1%  | 1%  | 1%  | 1%  | 2%  | 2%  | 1%  | 1%  | 2%  | 2%  | 2%  | 2%  |
| <b>PE36:1</b>      | 4%  | 4%  | 5%  | 5%  | 4%  | 5%  | 4%  | 7%  | 6%  | 4%  | 4%  | 5%  | 5%  | 6%  | 5%  |
| <b>PE36:2</b>      | 25% | 27% | 30% | 30% | 26% | 28% | 24% | 27% | 26% | 25% | 26% | 23% | 24% | 27% | 24% |
| <b>PE36:3</b>      | 8%  | 9%  | 8%  | 7%  | 9%  | 8%  | 10% | 6%  | 7%  | 8%  | 9%  | 9%  | 9%  | 6%  | 7%  |
| <b>PE38:4</b>      | 41% | 44% | 39% | 43% | 45% | 42% | 46% | 36% | 37% | 46% | 45% | 46% | 45% | 41% | 48% |
| <b>PE40:6</b>      |     |     |     | 2%  | 4%  | 5%  | 1%  | 2%  | 1%  | 5%  | 2%  | 1%  |     |     | 2%  |
| <b>PEO-34:2</b>    | 1%  | 1%  | 1%  | 1%  |     | 1%  |     | 2%  | 2%  | 1%  | 1%  |     |     | 1%  |     |
| <b>PEO-36:5</b>    | 3%  | 3%  | 2%  | 2%  | 2%  | 2%  | 2%  | 2%  | 2%  | 2%  | 3%  | 2%  | 2%  | 2%  | 2%  |
| <b>PEO-38:5</b>    | 2%  | 2%  | 2%  | 2%  | 1%  | 2%  | 2%  | 2%  | 2%  | 1%  | 1%  | 1%  | 2%  | 1%  | 1%  |
| <b>SM</b>          |     |     |     |     |     |     |     |     |     |     |     |     |     |     |     |
| <b>SMd32:1</b>     | 3%  | 2%  | 2%  | 2%  | 3%  | 3%  | 2%  | 4%  | 4%  | 2%  | 3%  | 2%  | 2%  | 3%  | 3%  |
| <b>SMd34:1</b>     | 10% | 9%  | 9%  | 9%  | 9%  | 10% | 9%  | 9%  | 10% | 8%  | 8%  | 11% | 10% | 9%  | 8%  |
| <b>SMd36:0</b>     | 2%  | 2%  | 2%  | 1%  | 2%  | 2%  | 2%  | 2%  | 2%  | 2%  | 1%  | 1%  | 2%  | 2%  | 2%  |
| <b>SMd36:1</b>     | 14% | 15% | 17% | 16% | 19% | 18% | 20% | 14% | 15% | 16% | 14% | 17% | 16% | 15% | 14% |
| <b>SMd38:1</b>     | 13% | 13% | 15% | 14% | 14% | 14% | 14% | 11% | 10% | 11% | 10% | 13% | 13% | 10% | 12% |
| <b>SMd40:1_1</b>   | 24% | 28% | 26% | 29% | 29% | 27% | 28% | 24% | 24% | 30% | 29% | 25% | 26% | 26% | 27% |
| <b>SMd40:1_2</b>   |     |     |     |     |     |     |     | 1%  |     |     | 1%  |     |     |     |     |
| <b>SMd40:2</b>     | 3%  | 2%  | 2%  | 1%  | 1%  | 2%  | 1%  | 1%  | 2%  | 2%  | 2%  | 3%  | 3%  | 1%  | 2%  |
| <b>SMd41:1</b>     | 4%  | 4%  | 4%  | 4%  | 5%  | 5%  | 5%  | 4%  | 4%  | 4%  | 4%  | 6%  | 6%  | 6%  | 5%  |
| <b>SMd42:2</b>     | 21% | 19% | 18% | 19% | 15% | 15% | 15% | 23% | 23% | 21% | 22% | 18% | 16% | 22% | 22% |
| <b>SMd42:3</b>     | 2%  | 1%  | 2%  |     |     | 1%  | 1%  | 1%  | 1%  | 1%  | 1%  | 2%  | 1%  | 1%  | 1%  |

|        | TG  |     |     |     |     |     |     |    |     |     |     |     |     |     |     |
|--------|-----|-----|-----|-----|-----|-----|-----|----|-----|-----|-----|-----|-----|-----|-----|
| TG40:0 | 1%  | 1%  | 2%  | 1%  | 1%  | 1%  |     | 2% | 1%  |     | 2%  |     |     | 3%  | 1%  |
| TG42:0 | 2%  | 2%  | 2%  | 2%  | 2%  | 2%  |     | 4% | 2%  | 1%  | 2%  |     |     | 3%  | 2%  |
| TG42:1 | 2%  | 2%  | 2%  | 2%  | 2%  | 2%  | 2%  | 1% | 2%  | 2%  | 3%  | 1%  |     | 3%  | 3%  |
| TG44:0 | 2%  | 1%  | 2%  | 1%  | 2%  | 4%  |     | 6% | 1%  | 1%  | 1%  |     | 1%  | 2%  | 2%  |
| TG44:1 | 4%  | 5%  | 5%  | 4%  | 5%  | 4%  | 3%  | 3% | 4%  | 4%  | 6%  | 2%  | 2%  | 5%  | 5%  |
| TG44:2 | 1%  | 2%  | 2%  | 2%  | 1%  | 1%  | 1%  | 1% | 2%  | 1%  | 2%  |     |     | 2%  | 2%  |
| TG46:1 | 7%  | 7%  | 7%  | 6%  | 8%  | 7%  | 4%  | 5% | 6%  | 5%  | 7%  | 3%  | 4%  | 7%  | 7%  |
| TG46:2 | 3%  | 3%  | 3%  | 3%  | 3%  | 2%  | 2%  | 2% | 3%  | 3%  | 4%  | 2%  | 2%  | 3%  | 3%  |
| TG48:1 | 6%  | 5%  | 5%  | 4%  | 6%  | 7%  | 4%  | 7% | 4%  | 4%  | 4%  | 3%  | 4%  | 6%  | 4%  |
| TG48:2 | 4%  | 4%  | 4%  | 4%  | 4%  | 4%  | 4%  | 3% | 3%  | 3%  | 4%  | 3%  | 3%  | 4%  | 3%  |
| TG48:3 | 2%  | 2%  | 2%  | 3%  | 2%  | 1%  | 2%  | 2% | 3%  | 2%  | 3%  | 1%  | 1%  | 2%  | 2%  |
| TG50:1 | 6%  | 5%  | 5%  | 3%  | 6%  | 9%  | 4%  | 7% | 3%  | 5%  | 3%  | 5%  | 9%  | 4%  | 5%  |
| TG50:2 | 7%  | 7%  | 7%  | 7%  | 8%  | 7%  | 7%  | 6% | 7%  | 6%  | 7%  | 6%  | 6%  | 6%  | 7%  |
| TG50:3 | 3%  | 3%  | 3%  | 4%  | 3%  | 2%  | 3%  | 3% | 4%  | 3%  | 3%  | 2%  | 2%  | 3%  | 3%  |
| TG52:1 | 4%  | 3%  | 3%  | 2%  | 3%  | 10% | 4%  | 8% | 2%  | 4%  | 2%  | 7%  | 8%  | 3%  | 4%  |
| TG52:2 | 15% | 14% | 14% | 13% | 14% | 12% | 17% | 7% | 12% | 16% | 12% | 21% | 19% | 10% | 14% |
| TG52:3 | 8%  | 9%  | 8%  | 10% | 8%  | 6%  | 10% | 5% | 9%  | 10% | 7%  | 9%  | 12% | 6%  | 9%  |
| TG52:4 | 3%  | 3%  | 2%  | 3%  | 3%  | 2%  | 2%  | 2% | 3%  | 3%  | 2%  | 3%  | 3%  | 2%  | 2%  |
| TG54:2 | 2%  | 2%  | 2%  | 2%  | 2%  | 2%  | 3%  | 4% | 2%  | 2%  | 2%  | 4%  | 3%  | 2%  | 2%  |
| TG54:3 | 4%  | 4%  | 4%  | 5%  | 3%  | 3%  | 8%  | 4% | 5%  | 6%  | 5%  | 8%  | 6%  | 3%  | 4%  |
| TG54:4 | 3%  | 3%  | 3%  | 4%  | 2%  | 2%  | 5%  | 3% | 5%  | 5%  | 4%  | 5%  | 4%  | 2%  | 4%  |
| TG54:5 | 1%  | 1%  | 1%  | 2%  | 1%  |     | 2%  | 2% | 3%  | 2%  | 1%  | 3%  | 2%  | 1%  | 2%  |

DG, diacylglycerol; MG, monoacylglycerol; PC, glycerophosphocholine; PC-O, ether analogue of glycerophosphocholine; PE, glycerophosphoethanolamine; PE-O, ether analogue of glycerophosphoethanolamine; PS, glycerophosphoserine; PI, glycerophosphoinositol; SM, sphingomyelin; TG, triacylglycerol; TGO, ether analogue of triacylglycerol.

**Table S7. The % relative amount of lipid species within specific class of lipids in FM samples. The average value calculated for extraction duplicates is shown. The empty space indicate that lipid specie was below the specified threshold (% contribution within class was lower than 1%, this include not detected species)**

| Compound    | FM.1.1 | FM.1.2 | FM.1.3 | FM.2.1 | FM.2.2 | FM.2.3 | FM.3.1 | FM.3.2 | FM.4.1 | FM.4.1.F<br>MGM | FM.4.2 | FM.4.3 | FM.5.1 | FM.5.2 | FM.5.3 | FM.6.1 | FM.6.2 | FM.6.3 | FM.7.1 | FM.7.2 |
|-------------|--------|--------|--------|--------|--------|--------|--------|--------|--------|-----------------|--------|--------|--------|--------|--------|--------|--------|--------|--------|--------|
| <b>PC</b>   |        |        |        |        |        |        |        |        |        |                 |        |        |        |        |        |        |        |        |        |        |
| Lyso-PC14:0 | 2%     |        | 2%     | 2%     | 1%     | 1%     |        |        |        |                 |        |        |        |        |        |        |        |        |        |        |
| LysoPC16:0  | 6%     | 2%     | 8%     | 7%     | 4%     | 7%     | 2%     | 1%     | 3%     | 2%              | 2%     | 2%     | 3%     | 3%     | 4%     | 2%     | 3%     | 4%     | 1%     | 4%     |
| Lyso-PC18:0 | 1%     |        | 1%     | 1%     | 1%     | 1%     | 1%     |        | 1%     |                 |        | 1%     | 1%     |        | 1%     |        | 1%     | 1%     |        | 1%     |
| Lyso-PC18:1 | 7%     | 2%     | 8%     | 8%     | 3%     | 7%     | 4%     | 1%     | 3%     | 2%              | 3%     | 2%     | 3%     | 3%     | 4%     | 2%     | 4%     | 4%     | 1%     | 1%     |
| Lyso-PC18:2 | 5%     | 3%     | 7%     | 6%     | 4%     | 7%     | 3%     | 1%     | 11%    | 4%              | 6%     | 6%     | 1%     | 1%     | 2%     | 3%     | 8%     | 9%     |        | 2%     |
| PC28:0      | 2%     | 2%     | 1%     | 2%     | 2%     | 1%     |        |        |        | 1%              |        | 1%     | 1%     |        | 1%     | 2%     | 1%     | 1%     |        |        |
| PC30:0      | 8%     | 8%     | 6%     | 8%     | 8%     | 5%     | 2%     | 2%     | 3%     | 5%              | 2%     | 4%     | 3%     | 3%     | 3%     | 7%     | 3%     | 3%     | 3%     | 3%     |
| PC31:0      | 1%     | 2%     | 1%     | 1%     | 1%     | 1%     | 1%     | 1%     |        | 1%              |        |        | 1%     | 1%     | 1%     | 1%     | 1%     |        | 1%     | 1%     |
| PC32:0      | 8%     | 5%     | 6%     | 8%     | 8%     | 6%     | 8%     | 8%     | 2%     | 6%              | 2%     | 4%     | 10%    | 10%    | 11%    | 8%     | 4%     | 3%     | 10%    | 10%    |
| PC32:1      | 3%     | 4%     | 3%     | 3%     | 3%     | 3%     | 1%     | 1%     | 1%     | 2%              | 1%     | 2%     | 2%     | 2%     | 2%     | 3%     | 2%     | 1%     | 2%     | 2%     |
| PC33:0      |        | 1%     | 1%     |        | 1%     | 1%     |        | 1%     |        |                 |        |        | 1%     | 1%     | 1%     | 1%     |        |        |        | 1%     |
| PC33:1      | 1%     | 1%     | 1%     | 1%     | 1%     | 1%     | 1%     | 1%     |        | 1%              |        |        | 1%     | 1%     | 1%     | 1%     |        |        | 1%     | 1%     |
| PC34:0      | 2%     | 2%     | 2%     | 2%     | 2%     | 2%     | 4%     | 3%     | 1%     | 1%              | 1%     | 1%     | 4%     | 4%     | 4%     | 2%     | 1%     | 1%     | 4%     | 4%     |
| PC34:1      | 17%    | 15%    | 14%    | 15%    | 16%    | 14%    | 19%    | 23%    | 7%     | 13%             | 9%     | 10%    | 27%    | 26%    | 26%    | 18%    | 11%    | 11%    | 29%    | 26%    |
| PC34:2      | 8%     | 13%    | 9%     | 9%     | 10%    | 10%    | 11%    | 11%    | 16%    | 17%             | 19%    | 16%    | 8%     | 8%     | 7%     | 11%    | 16%    | 17%    | 7%     | 8%     |
| PC34:3      | 1%     | 1%     | 1%     | 1%     | 1%     | 1%     | 1%     | 1%     | 2%     | 1%              | 1%     | 2%     | 1%     | 1%     | 1%     | 1%     | 1%     | 1%     | 1%     | 1%     |
| PC36:1      | 4%     | 4%     | 3%     | 4%     | 4%     | 4%     | 5%     | 5%     | 2%     | 3%              | 2%     | 2%     | 6%     | 6%     | 5%     | 4%     | 2%     | 2%     | 7%     | 7%     |
| PC36:2      | 8%     | 10%    | 8%     | 8%     | 9%     | 9%     | 15%    | 17%    | 8%     | 9%              | 8%     | 8%     | 17%    | 16%    | 15%    | 10%    | 9%     | 8%     | 19%    | 17%    |
| PC36:3      | 6%     | 9%     | 7%     | 5%     | 7%     | 8%     | 9%     | 10%    | 9%     | 11%             | 16%    | 10%    | 6%     | 7%     | 6%     | 9%     | 13%    | 12%    | 7%     | 7%     |
| PC36:4      | 5%     | 12%    | 8%     | 5%     | 9%     | 9%     | 10%    | 11%    | 23%    | 16%             | 23%    | 22%    | 3%     | 2%     | 2%     | 10%    | 17%    | 17%    | 2%     | 2%     |

|                         |     |     |     |     |     |     |     |     |     |           |     |     |     |     |     |     |     |     |     |     |
|-------------------------|-----|-----|-----|-----|-----|-----|-----|-----|-----|-----------|-----|-----|-----|-----|-----|-----|-----|-----|-----|-----|
| <b>PC36:5</b>           | 1%  | 2%  | 1%  | 1%  | 1%  | 1%  |     |     | 5%  | 2%        | 3%  | 5%  |     |     | 1%  | 2%  | 2%  |     |     |     |
| <b>PCO-34:1</b>         |     |     |     |     |     |     | 1%  | 1%  |     |           |     |     | 1%  | 1%  | 1%  |     |     |     | 1%  | 1%  |
|                         |     |     |     |     |     |     |     |     |     | <b>PE</b> |     |     |     |     |     |     |     |     |     |     |
| <b>Lyso-PE18:1</b>      | 14% | 5%  | 19% | 16% | 8%  | 15% | 5%  | 1%  | 6%  | 3%        | 4%  | 6%  | 4%  | 5%  | 6%  | 4%  | 6%  | 8%  | 2%  | 7%  |
| <b>LYsoPE18:2</b>       | 2%  | 1%  | 2%  | 1%  | 1%  | 2%  | 1%  |     | 2%  | 1%        | 1%  | 1%  |     |     | 1%  | 1%  | 1%  | 1%  |     | 1%  |
| <b>PE34:1</b>           | 7%  | 6%  | 6%  | 7%  | 6%  | 5%  | 5%  | 5%  | 4%  | 6%        | 5%  | 5%  | 6%  | 5%  | 7%  | 8%  | 7%  | 7%  | 5%  | 6%  |
| <b>PE34:2</b>           | 4%  | 6%  | 4%  | 1%  | 6%  | 5%  | 4%  | 4%  | 18% | 11%       | 17% | 14% | 3%  | 2%  | 3%  | 8%  | 15% | 15% | 2%  | 2%  |
| <b>PE36:1</b>           | 5%  | 5%  | 5%  | 6%  | 5%  | 4%  | 4%  | 5%  | 2%  | 4%        | 1%  | 2%  | 4%  | 5%  | 5%  | 4%  | 2%  | 2%  | 5%  | 5%  |
| <b>PE36:2</b>           | 22% | 16% | 16% | 22% | 22% | 14% | 19% | 20% | 10% | 19%       | 8%  | 11% | 21% | 21% | 22% | 22% | 12% | 10% | 24% | 21% |
| <b>PE36:3</b>           | 7%  | 8%  | 6%  | 9%  | 9%  | 7%  | 7%  | 8%  | 8%  | 10%       | 11% | 9%  | 9%  | 8%  | 9%  | 10% | 11% | 11% | 8%  | 7%  |
| <b>PE36:4</b>           | 2%  | 3%  | 3%  | 2%  | 3%  | 3%  | 2%  | 3%  | 16% | 8%        | 13% | 13% | 1%  | 1%  | 1%  | 4%  | 11% | 11% | 1%  | 1%  |
| <b>PE38:4</b>           | 36% | 48% | 39% | 35% | 37% | 43% | 50% | 50% | 32% | 34%       | 37% | 37% | 47% | 48% | 42% | 36% | 33% | 33% | 52% | 46% |
| <b>PE40:6</b>           | 1%  | 2%  |     |     | 2%  | 2%  | 3%  | 3%  | 2%  | 2%        | 2%  | 1%  | 3%  | 3%  | 2%  | 2%  | 2%  | 2%  |     | 3%  |
| <b>PEO-34:2</b>         |     |     |     |     | 1%  |     | 1%  | 1%  |     |           |     |     | 1%  | 1%  | 1%  |     |     |     | 1%  | 1%  |
|                         |     |     |     |     |     |     |     |     |     | <b>SM</b> |     |     |     |     |     |     |     |     |     |     |
| <b>SMd32:0</b>          | 3%  | 3%  | 3%  | 3%  | 3%  | 2%  |     |     | 3%  | 2%        | 3%  | 3%  |     |     |     | 3%  | 3%  | 3%  |     |     |
| <b>SMd32:1</b>          | 6%  | 7%  | 7%  | 6%  | 6%  | 7%  | 5%  | 6%  | 6%  | 6%        | 7%  | 7%  | 6%  | 5%  | 5%  | 6%  | 6%  | 6%  | 6%  | 5%  |
| <b>SMd33:1/S Mt32:2</b> | 4%  | 5%  | 4%  | 4%  | 4%  | 4%  | 2%  | 2%  | 4%  | 4%        | 5%  | 4%  | 2%  | 2%  | 2%  | 4%  | 4%  | 4%  | 2%  | 2%  |
| <b>SMd34:0</b>          | 3%  | 3%  | 3%  | 3%  | 4%  | 2%  | 1%  | 1%  | 3%  | 3%        | 3%  | 3%  | 1%  | 1%  | 1%  | 4%  | 3%  | 3%  | 1%  | 1%  |
| <b>SMd34:1</b>          | 28% | 25% | 26% | 26% | 24% | 27% | 30% | 31% | 24% | 26%       | 25% | 28% | 31% | 32% | 32% | 25% | 27% | 24% | 33% | 31% |
| <b>SMd34:2</b>          | 1%  | 1%  | 1%  | 1%  | 1%  | 1%  |     | 1%  | 1%  | 1%        | 1%  | 1%  |     |     | 1%  | 1%  | 1%  |     |     | 1%  |
| <b>SMd36:1</b>          | 1%  | 2%  | 2%  | 2%  | 2%  | 1%  | 9%  | 11% | 2%  | 2%        | 2%  | 1%  | 8%  | 9%  | 7%  | 1%  | 1%  | 1%  | 9%  | 8%  |
| <b>SMd36:2</b>          |     |     |     |     |     |     | 1%  | 1%  |     |           |     |     | 1%  | 1%  | 1%  |     |     |     | 1%  | 1%  |
| <b>SMd38:0</b>          | 3%  | 4%  | 4%  | 3%  | 3%  | 3%  |     |     | 4%  | 3%        | 3%  | 4%  |     |     |     | 3%  | 3%  | 3%  |     |     |
| <b>SMd38:1</b>          |     |     |     |     |     |     | 1%  | 2%  |     |           |     |     | 1%  | 1%  | 1%  |     |     |     | 2%  | 2%  |
| <b>SMd39:0</b>          | 4%  | 4%  | 4%  | 3%  | 4%  | 3%  |     |     | 4%  | 3%        | 4%  | 4%  |     |     |     | 4%  | 4%  | 4%  |     |     |
| <b>SMd39:1</b>          | 12% | 14% | 14% | 13% | 14% | 13% | 3%  | 2%  | 16% | 11%       | 13% | 13% | 3%  | 2%  | 2%  | 14% | 15% | 14% | 2%  | 2%  |
| <b>SMd39:2</b>          | 1%  | 1%  | 2%  | 1%  | 1%  | 2%  |     |     | 1%  | 1%        | 2%  | 1%  |     |     |     | 1%  | 1%  | 1%  |     |     |

|                  |     |     |     |     |     |     |     |     |     |     |     |     |     |     |     |     |     |     |     |     |
|------------------|-----|-----|-----|-----|-----|-----|-----|-----|-----|-----|-----|-----|-----|-----|-----|-----|-----|-----|-----|-----|
| <b>SMd40:0</b>   | 2%  | 2%  | 2%  | 2%  | 2%  | 2%  |     |     | 2%  | 2%  | 2%  | 2%  |     |     |     | 2%  | 2%  | 2%  |     |     |
| <b>SMd40:1_1</b> | 6%  | 7%  | 5%  | 9%  | 8%  | 7%  | 14% | 14% | 6%  | 10% | 5%  | 7%  | 18% | 17% | 17% | 6%  | 5%  | 8%  | 18% | 16% |
| <b>SMd40:1_2</b> | 5%  | 6%  | 5%  | 4%  | 5%  | 5%  | 2%  | 2%  | 6%  | 5%  | 5%  | 5%  | 1%  | 1%  | 1%  | 6%  | 5%  | 5%  | 1%  | 3%  |
| <b>SMd40:2</b>   | 2%  | 1%  | 3%  | 2%  | 2%  | 3%  | 1%  | 1%  | 3%  | 3%  | 3%  | 2%  | 1%  | 1%  | 1%  | 3%  | 2%  | 1%  | 1%  | 1%  |
| <b>SMd41:1</b>   | 14% | 12% | 13% | 13% | 13% | 12% | 22% | 19% | 14% | 14% | 11% | 13% | 20% | 21% | 22% | 14% | 14% | 15% | 17% | 22% |
| <b>SMd41:2</b>   | 1%  | 1%  | 1%  | 2%  | 1%  | 2%  | 2%  | 1%  |     | 1%  | 2%  |     | 1%  | 1%  | 1%  |     |     | 1%  | 1%  | 1%  |
| <b>SMd42:2</b>   | 2%  | 2%  | 2%  | 2%  | 2%  | 2%  | 4%  | 4%  | 2%  | 2%  | 3%  | 2%  | 3%  | 3%  | 4%  | 2%  | 2%  | 2%  | 3%  | 3%  |
| <b>TG</b>        |     |     |     |     |     |     |     |     |     |     |     |     |     |     |     |     |     |     |     |     |
| <b>TG30:0</b>    | 1%  | 1%  |     | 1%  | 1%  |     | 1%  |     | 1%  | 1%  | 1%  | 1%  | 1%  | 1%  |     | 1%  | 1%  |     |     | 1%  |
| <b>TG32:0</b>    | 3%  | 3%  |     | 3%  | 3%  |     | 1%  | 1%  | 3%  | 3%  | 3%  | 2%  | 1%  | 1%  | 1%  | 3%  | 2%  |     | 1%  | 1%  |
| <b>TG34:0</b>    | 4%  | 4%  |     | 4%  | 4%  |     | 1%  | 1%  | 3%  | 4%  | 4%  | 3%  | 2%  | 1%  | 2%  | 3%  | 4%  |     | 1%  | 2%  |
| <b>TG34:1</b>    |     |     |     |     |     |     | 1%  | 1%  |     |     |     |     | 1%  | 1%  | 1%  |     |     |     | 1%  | 1%  |
| <b>TG36:0</b>    | 5%  | 5%  |     | 5%  | 5%  |     | 2%  | 2%  | 4%  | 4%  | 4%  | 2%  | 2%  | 2%  | 3%  | 4%  | 4%  |     | 2%  | 3%  |
| <b>TG36:1</b>    |     |     |     |     |     |     | 1%  | 1%  |     |     |     | 1%  | 1%  | 1%  | 1%  |     |     |     | 1%  | 1%  |
| <b>TG38:0</b>    | 3%  | 4%  |     | 3%  | 4%  |     |     |     | 3%  | 3%  | 3%  | 1%  |     |     |     | 3%  | 3%  |     |     |     |
| <b>TG38:1</b>    | 1%  | 1%  |     | 1%  | 1%  |     | 3%  | 3%  |     | 1%  |     | 2%  | 3%  | 3%  | 3%  | 1%  |     |     | 3%  | 3%  |
| <b>TG38:2</b>    |     |     |     |     |     |     | 1%  | 1%  |     |     |     |     | 1%  | 1%  | 1%  |     |     |     | 1%  | 1%  |
| <b>TG40:0</b>    | 3%  | 3%  |     | 3%  | 3%  |     | 1%  | 2%  | 2%  | 2%  | 2%  | 1%  | 2%  | 2%  | 1%  | 2%  | 2%  |     |     | 3%  |
| <b>TG40:1</b>    |     |     |     |     |     |     | 1%  | 1%  |     |     |     | 1%  |     |     |     |     |     |     |     |     |
| <b>TG40:2</b>    |     |     |     |     |     |     | 1%  | 1%  |     |     |     | 1%  | 1%  | 1%  | 1%  |     |     |     | 1%  | 1%  |
| <b>TG42:0</b>    | 2%  | 2%  |     | 2%  | 2%  |     | 2%  | 2%  | 1%  | 1%  | 1%  | 1%  | 3%  | 3%  | 3%  | 1%  | 1%  |     | 2%  | 2%  |
| <b>TG42:1</b>    | 1%  | 1%  |     | 1%  | 1%  |     | 2%  | 1%  | 1%  | 1%  | 1%  | 1%  | 1%  | 2%  | 1%  | 1%  | 1%  |     | 1%  | 1%  |
| <b>TG42:2</b>    |     |     |     |     |     |     | 1%  | 1%  |     |     |     |     |     | 1%  |     |     |     |     | 1%  | 1%  |
| <b>TG44:0</b>    | 1%  | 1%  |     | 1%  | 1%  |     | 1%  | 1%  | 1%  | 1%  | 1%  | 1%  | 1%  | 1%  | 1%  | 1%  | 1%  |     | 1%  | 1%  |
| <b>TG44:1</b>    | 1%  | 1%  |     | 1%  | 1%  |     | 3%  | 3%  |     | 1%  |     | 1%  | 3%  | 3%  | 2%  | 1%  | 1%  |     | 3%  | 3%  |
| <b>TG44:2</b>    |     |     |     |     |     |     | 1%  | 1%  |     |     |     |     | 1%  | 1%  | 1%  |     |     |     | 1%  | 1%  |
| <b>TG46:1</b>    | 1%  | 1%  |     | 1%  | 1%  |     | 1%  | 1%  |     | 1%  |     | 1%  | 2%  | 2%  | 2%  | 1%  | 1%  |     | 1%  | 2%  |
| <b>TG46:2</b>    |     |     |     |     |     |     | 1%  | 1%  |     |     |     |     | 1%  | 1%  | 1%  |     |     |     | 1%  | 1%  |
| <b>TG48:1</b>    | 1%  | 1%  | 1%  | 1%  | 1%  | 1%  | 1%  | 1%  | 1%  | 1%  | 1%  | 1%  | 2%  | 2%  | 2%  | 1%  |     | 1%  | 2%  | 2%  |
| <b>TG48:2</b>    |     | 1%  |     | 1%  | 1%  |     | 1%  | 1%  |     | 1%  | 1%  | 1%  | 1%  | 1%  | 1%  |     |     |     | 1%  | 1%  |
| <b>TG50:1</b>    | 8%  | 7%  | 9%  | 8%  | 8%  | 9%  | 2%  | 2%  | 12% | 10% | 12% | 7%  | 11% | 11% | 11% | 1%  | 1%  | 13% | 10% | 11% |



|               |     |     |     |     |     |     |     |     |     |     |     |     |     |     |     |     |     |     |     |     |    |
|---------------|-----|-----|-----|-----|-----|-----|-----|-----|-----|-----|-----|-----|-----|-----|-----|-----|-----|-----|-----|-----|----|
| <b>TG50:2</b> | 3%  | 3%  | 3%  | 3%  | 3%  | 3%  | 1%  | 1%  | 4%  | 5%  | 4%  | 3%  | 4%  | 4%  | 4%  | 1%  | 1%  | 5%  | 4%  | 4%  |    |
| <b>TG50:3</b> |     |     |     |     |     |     |     |     |     |     |     |     | 1%  | 1%  | 1%  |     |     |     |     | 1%  |    |
| <b>TG52:1</b> | 2%  | 2%  | 2%  | 2%  | 2%  | 2%  | 1%  | 1%  | 3%  | 3%  | 2%  | 2%  | 3%  | 3%  | 3%  | 1%  | 1%  | 3%  | 3%  | 3%  |    |
| <b>TG52:2</b> | 10% | 9%  | 14% | 10% | 10% | 14% | 7%  | 6%  | 13% | 11% | 13% | 10% | 12% | 13% | 13% | 7%  | 7%  | 14% | 13% | 13% |    |
| <b>TG52:3</b> | 5%  | 5%  | 6%  | 5%  | 5%  | 6%  | 3%  | 3%  | 7%  | 7%  | 6%  | 5%  | 6%  | 5%  | 6%  | 3%  | 3%  | 8%  | 5%  | 5%  |    |
| <b>TG52:4</b> | 2%  | 3%  | 3%  | 2%  | 2%  | 3%  | 2%  | 2%  | 4%  | 4%  | 4%  | 3%  | 2%  | 2%  | 2%  | 3%  | 3%  | 4%  | 2%  | 2%  |    |
| <b>TG52:5</b> |     |     |     |     |     |     |     |     | 1%  | 1%  | 1%  | 1%  |     |     |     |     |     |     |     |     |    |
| <b>TG54:1</b> |     |     |     |     |     |     |     |     |     |     |     |     |     | 1%  | 1%  | 1%  |     |     |     | 1%  | 1% |
| <b>TG54:2</b> | 2%  | 2%  | 4%  | 2%  | 2%  | 4%  | 4%  | 4%  | 3%  | 3%  | 3%  | 3%  | 3%  | 3%  | 3%  | 4%  | 4%  | 3%  | 3%  | 3%  |    |
| <b>TG54:3</b> | 15% | 16% | 27% | 15% | 14% | 26% | 23% | 23% | 14% | 12% | 14% | 15% | 8%  | 8%  | 8%  | 25% | 28% | 13% | 13% | 8%  |    |
| <b>TG54:4</b> | 8%  | 9%  | 11% | 8%  | 8%  | 11% | 8%  | 8%  | 4%  | 5%  | 4%  | 8%  | 6%  | 5%  | 6%  | 11% | 9%  | 11% | 6%  | 5%  |    |
| <b>TG54:5</b> | 7%  | 7%  | 8%  | 8%  | 7%  | 8%  | 7%  | 7%  | 4%  | 5%  | 5%  | 7%  | 5%  | 4%  | 5%  | 10% | 10% | 11% | 5%  | 4%  |    |
| <b>TG54:6</b> | 4%  | 4%  | 4%  | 4%  | 4%  | 4%  | 4%  | 4%  | 5%  | 5%  | 5%  | 5%  | 3%  | 3%  | 3%  | 6%  | 6%  | 6%  | 3%  | 3%  |    |
| <b>TG54:7</b> | 1%  | 1%  | 1%  | 1%  | 1%  | 1%  | 1%  | 1%  | 1%  | 1%  | 1%  | 2%  |     |     |     | 1%  | 1%  | 1%  |     |     |    |
| <b>TG56:2</b> |     |     | 1%  |     |     | 1%  |     |     |     |     |     |     |     |     |     | 1%  |     |     |     |     |    |
| <b>TG56:3</b> | 1%  | 1%  | 1%  | 1%  | 1%  | 1%  | 1%  | 1%  |     |     |     | 1%  |     |     |     | 1%  | 1%  | 1%  |     |     |    |
| <b>TG58:2</b> |     |     | 1%  |     |     | 1%  | 1%  | 1%  |     |     |     |     |     |     |     | 1%  | 1%  |     |     |     |    |

DG, diacylglycerol; MG, monoacylglycerol; PC, glycerophosphocholine; PC-O, ether analogue of glycerophosphocholine; PE, glycerophosphoethanolamine; PE-O, ether analogue of glycerophosphoethanolamine; PS, glycerophosphoserine; PI, glycerophosphoinositol; SM, sphingomyelin; TG, triacylglycerol; TGO, ether analogue of triacylglycerol.

**Table S8. The complete list of statistically significantly different between the colostrum and further lactation stage samples (ANOVA unequal variance test,  $p < 0.01$ , multiple testing correction: Benjamini-Hochberg, colostrum versus HM 0-6 mo., colostrum versus HM 6-12 mo., colostrum versus HM > 12 mo.**

| Compound                                   | p (Corr)<br>(HM colostrum<br>vs HM 0-6 mo.<br>vs HM 6-12 mo.<br>vs HM > 12 mo.) | p<br>HM 0-6 mo. vs<br>colostrum | p<br>(HM6-12 mo. vs<br>colostrum) | p<br>(HM > 12 mo. vs<br>colostrum) | Average peak<br>area fold change<br>HM 0-6 mo.<br>(n=10) vs<br>colostrum (n=11) | Average peak<br>area fold change<br>HM 6-12 mo.<br>(n=8) vs<br>colostrum (n=11) | Average peak<br>area fold change<br>HM > 12 mo<br>(n=16). vs<br>colostrum (n=11) |
|--------------------------------------------|---------------------------------------------------------------------------------|---------------------------------|-----------------------------------|------------------------------------|---------------------------------------------------------------------------------|---------------------------------------------------------------------------------|----------------------------------------------------------------------------------|
| <b>DG24:0</b>                              | 7.91E-08                                                                        | 1.46E-04                        | 1.46E-04                          | 1.46E-04                           | 4.0 <sup>a</sup>                                                                | 3.2                                                                             | 4.3                                                                              |
| <b>DG32:1</b>                              | 2.73E-07                                                                        | 1.71E-04                        | 1.65E-04                          | 1.46E-04                           | 2.8                                                                             | 3.2                                                                             | 3.2                                                                              |
| <b>DG36:1</b>                              | 1.90E-05                                                                        | 7.37E-03                        | 1.31E-03                          | 1.49E-04                           | 2.1                                                                             | 2.7                                                                             | 3.0                                                                              |
| <b>DG36:2</b>                              | 3.51E-05                                                                        | 3.49E-04                        | 1.15E-03                          | 2.09E-04                           | 2.8                                                                             | 2.8                                                                             | 2.7                                                                              |
| <b>DG36:3</b>                              | 9.96E-10                                                                        | 1.46E-04                        | 9.69E-03                          | 1.54E-04                           | 4.4                                                                             | 2.8                                                                             | 3.5                                                                              |
| <b>DG36:4</b>                              | 1.32E-11                                                                        | 1.46E-04                        | 1.46E-04                          | 1.46E-04                           | 9.0                                                                             | 6.7                                                                             | 6.7                                                                              |
| <b>LysoPC18:3</b>                          | 5.21E-08                                                                        | 1.81E-04                        | 1.19E-03                          | 1.46E-04                           | 2.8                                                                             | 2.6                                                                             | 3.9                                                                              |
| <b>LysoPCO-<br/>18:0/LysoPEO-<br/>21:0</b> | 4.76E-03                                                                        | 1.48E-04                        | 1.46E-04                          | 5.37E-04                           | -3.3                                                                            | -2.6                                                                            | -1.0                                                                             |
| <b>LysoPE18:2</b>                          | 9.17E-14                                                                        | 1.46E-04                        | 1.46E-04                          | 1.46E-04                           | 3.5                                                                             | 3.4                                                                             | 4.5                                                                              |
| <b>PC30:0</b>                              | 3.41E-07                                                                        | 1.46E-04                        | 1.58E-04                          | 8.54E-04                           | -3.4                                                                            | -3.1                                                                            | -2.1                                                                             |
| <b>PC31:0</b>                              | 9.56E-11                                                                        | 1.46E-04                        | 1.46E-04                          | 1.46E-04                           | -3.2                                                                            | -3.7                                                                            | -2.9                                                                             |
| <b>PC32:0</b>                              | 3.56E-10                                                                        | 1.46E-04                        | 1.46E-04                          | 1.46E-04                           | -2.7                                                                            | -3.9                                                                            | -2.4                                                                             |
| <b>PC33:0</b>                              | 9.37E-06                                                                        | 3.20E-04                        | 1.72E-04                          | 2.44E-04                           | -2.7                                                                            | -3.3                                                                            | -2.5                                                                             |
| <b>PC34:0</b>                              | 2.74E-06                                                                        | 9.86E-04                        | 1.46E-04                          | 6.24E-04                           | -2.0                                                                            | -3.1                                                                            | -1.9                                                                             |
| <b>PCO-34:1</b>                            | 1.67E-14                                                                        | 1.46E-04                        | 1.46E-04                          | 1.46E-04                           | -3.6                                                                            | -5.3                                                                            | -3.0                                                                             |
| <b>PEO-36:5</b>                            | 3.34E-08                                                                        | 1.61E-04                        | 1.46E-04                          | 6.09E-03                           | -2.8                                                                            | -4.7                                                                            | -1.9                                                                             |
| <b>PI36:1</b>                              | 1.09E-12                                                                        | 1.46E-04                        | 1.27E-03                          | 1.46E-04                           | 2.6                                                                             | 2.0                                                                             | 4.1                                                                              |
| <b>PI38:4</b>                              | 3.32E-12                                                                        | 1.46E-04                        | 1.46E-04                          | 1.46E-04                           | -3.4                                                                            | -6.7                                                                            | -3.6                                                                             |
| <b>PS36:1</b>                              | 1.39E-07                                                                        | 1.66E-04                        | 1.46E-04                          | 2.26E-04                           | -3.1                                                                            | -4.9                                                                            | -2.6                                                                             |
| <b>SMd33:1/SMt32:<br/>2</b>                | 1.72E-09                                                                        | 1.46E-04                        | 1.46E-04                          | 1.68E-04                           | -2.5                                                                            | -3.4                                                                            | -1.9                                                                             |
| <b>SMd34:1</b>                             | 3.21E-08                                                                        | 1.56E-04                        | 1.46E-04                          | 4.87E-03                           | -2.3                                                                            | -3.4                                                                            | -1.7                                                                             |

|         |          |          |          |          |       |       |      |
|---------|----------|----------|----------|----------|-------|-------|------|
| SMd34:2 | 1.83E-08 | 1.46E-04 | 1.46E-04 | 1.59E-04 | -2.9  | -3.4  | -2.2 |
| SMd36:0 | 4.72E-13 | 1.49E-04 | 5.21E-04 | 1.46E-04 | 3.1   | 2.7   | 6.6  |
| SMd42:0 | 1.15E-13 | 1.52E-04 | 1.96E-04 | 1.46E-04 | 3.6   | 3.6   | 9.6  |
| SMt34:1 | 1.96E-20 | 1.46E-04 | 1.46E-04 | 1.46E-04 | -11.1 | -21.6 | -6.2 |
| SMt42:1 | 4.86E-13 | 1.46E-04 | 1.46E-04 | 1.47E-04 | -3.8  | -5.2  | -2.3 |
| TG34:1  | 2.45E-15 | 1.46E-04 | 1.46E-04 | 1.46E-04 | 10.2  | 7.4   | 13.8 |
| TG36:1  | 6.92E-14 | 1.46E-04 | 1.59E-04 | 1.46E-04 | 7.5   | 4.5   | 11.6 |
| TG37:0  | 4.49E-05 | 3.67E-04 | 4.96E-03 | 1.46E-04 | 3.6   | 3.0   | 6.8  |
| TG38:1  | 8.94E-17 | 1.46E-04 | 1.46E-04 | 1.46E-04 | 7.4   | 4.9   | 9.6  |
| TG38:2  | 2.96E-16 | 1.46E-04 | 1.46E-04 | 1.46E-04 | 9.8   | 5.2   | 10.6 |
| TG38:3  | 3.10E-09 | 1.46E-04 | 1.50E-04 | 1.46E-04 | 9.4   | 3.9   | 12.3 |
| TG39:0  | 3.56E-10 | 1.46E-04 | 8.81E-04 | 1.46E-04 | 9.0   | 4.9   | 12.8 |
| TG39:1  | 3.99E-15 | 1.46E-04 | 1.46E-04 | 1.46E-04 | 9.8   | 5.8   | 11.0 |
| TG40:0  | 8.56E-10 | 1.51E-04 | 4.65E-03 | 1.46E-04 | 4.2   | 2.9   | 7.1  |
| TG40:1  | 1.51E-14 | 1.46E-04 | 1.46E-04 | 1.46E-04 | 7.3   | 5.1   | 7.6  |
| TG40:2  | 1.67E-14 | 1.46E-04 | 1.46E-04 | 1.46E-04 | 8.6   | 5.8   | 11.1 |
| TG40:3  | 5.19E-14 | 1.46E-04 | 1.46E-04 | 1.46E-04 | 9.5   | 5.3   | 9.7  |
| TG41:0  | 1.33E-10 | 1.47E-04 | 3.68E-03 | 1.46E-04 | 4.8   | 3.0   | 8.2  |
| TG41:1  | 8.27E-11 | 1.46E-04 | 1.46E-04 | 1.46E-04 | 6.8   | 4.3   | 7.8  |
| TG42:0  | 1.03E-09 | 2.41E-04 | 7.38E-03 | 1.46E-04 | 3.1   | 2.5   | 5.9  |
| TG42:1  | 1.76E-13 | 1.46E-04 | 1.48E-04 | 1.46E-04 | 5.4   | 3.7   | 6.7  |
| TG42:2  | 2.57E-13 | 1.46E-04 | 1.65E-04 | 1.46E-04 | 8.9   | 4.4   | 9.4  |
| TG42:3  | 1.50E-13 | 1.46E-04 | 1.46E-04 | 1.46E-04 | 12.1  | 6.8   | 11.9 |
| TG43:0  | 2.55E-09 | 1.50E-04 | 2.07E-03 | 1.46E-04 | 3.3   | 2.6   | 4.8  |
| TG43:1  | 7.80E-12 | 1.46E-04 | 1.57E-04 | 1.46E-04 | 6.1   | 4.0   | 6.9  |
| TG44:1  | 2.97E-12 | 1.46E-04 | 1.96E-04 | 1.46E-04 | 3.6   | 2.7   | 4.9  |
| TG44:2  | 1.22E-13 | 1.46E-04 | 1.66E-04 | 1.46E-04 | 5.9   | 3.3   | 6.7  |
| TG44:3  | 7.18E-14 | 1.46E-04 | 1.46E-04 | 1.46E-04 | 9.1   | 4.7   | 9.6  |
| TG46:2  | 3.35E-12 | 1.46E-04 | 4.55E-04 | 1.46E-04 | 3.6   | 2.3   | 4.3  |
| TG46:3  | 2.06E-14 | 1.46E-04 | 1.48E-04 | 1.46E-04 | 6.9   | 3.5   | 6.0  |
| TG46:4  | 1.22E-13 | 1.46E-04 | 1.46E-04 | 1.46E-04 | 14.3  | 6.9   | 11.0 |

|             |          |          |          |          |       |       |       |
|-------------|----------|----------|----------|----------|-------|-------|-------|
| TG47:3      | 6.79E-10 | 1.46E-04 | 1.46E-04 | 1.46E-04 | 4.9   | 2.7   | 5.0   |
| TG48:2      | 7.59E-09 | 1.55E-04 | 4.33E-03 | 1.46E-04 | 2.2   | 1.8   | 2.8   |
| TG48:3      | 5.66E-12 | 1.46E-04 | 2.98E-04 | 1.46E-04 | 3.9   | 2.5   | 4.2   |
| TG48:4      | 2.73E-12 | 1.46E-04 | 2.07E-04 | 1.46E-04 | 5.4   | 3.0   | 5.2   |
| TG48:5      | 2.40E-09 | 1.46E-04 | 1.88E-04 | 1.46E-04 | 8.6   | 6.7   | 11.2  |
| TG58:2      | 8.10E-08 | 1.46E-04 | 1.49E-04 | 1.47E-04 | -4.8  | -4.9  | -3.9  |
| TG58:3      | 3.23E-04 | 7.73E-04 | 4.50E-03 | 1.37E-03 | -2.3  | -2.3  | -2.1  |
| TG58:4      | 6.90E-05 | 9.31E-04 | 3.91E-04 | 5.37E-04 | -2.6  | -3.2  | -2.5  |
| TG58:6      | 8.39E-08 | 1.57E-04 | 1.46E-04 | 1.89E-04 | -2.3  | -3.3  | -2.0  |
| TG60:2      | 1.43E-08 | 1.46E-04 | 4.97E-04 | 1.46E-04 | -5.6  | -3.8  | -5.8  |
| TG60:4      | 3.71E-05 | 8.63E-03 | 3.53E-04 | 1.46E-04 | -3.7  | -6.8  | -4.9  |
| TG62:3      | 9.12E-18 | 1.46E-04 | 1.46E-04 | 1.46E-04 | -25.3 | -39.3 | -20.1 |
| TG62:4      | 3.99E-21 | 1.46E-04 | 1.46E-04 | 1.46E-04 | -17.1 | -28.1 | -23.1 |
| TGO-50:1    | 6.62E-10 | 1.46E-04 | 1.46E-04 | 4.85E-04 | -4.7  | -7.9  | -3.8  |
| TGO-52:2    | 1.37E-11 | 1.46E-04 | 1.46E-04 | 1.46E-04 | -3.4  | -4.9  | -3.1  |
| TGO-54:2    | 1.42E-05 | 1.46E-04 | 1.46E-04 | 8.81E-04 | -2.7  | -3.1  | -2.4  |
| DG34:2      | 3.13E-05 | 1.64E-04 |          | 3.32E-04 | 3.1   | 2.2   | 2.5   |
| LysoPC16:0  | 3.67E-06 | 1.35E-03 | 1.52E-04 |          | -1.7  | -2.3  | -1.2  |
| Lyso-PC18:2 | 4.31E-07 | 7.79E-04 |          | 1.46E-04 | 2.0   | 1.6   | 2.7   |
| PC29:0      | 6.57E-04 | 3.22E-03 |          | 1.63E-04 | -2.6  | -2.3  | -1.6  |
| PC32:1      | 1.96E-05 | 2.49E-04 | 1.87E-04 |          | -2.4  | -2.7  | -1.6  |
| PC33:1      | 2.24E-03 | 7.78E-03 | 3.49E-03 |          | -2.0  | -2.3  | -1.5  |
| PC34:1      | 3.09E-05 | 6.50E-03 | 1.72E-04 |          | -1.8  | -2.6  | -1.2  |
| PC35:1      | 9.10E-04 | 1.03E-03 | 8.73E-03 |          | -3.8  | -3.4  | -1.8  |
| PC36:5      | 6.40E-04 | 2.58E-04 |          | 1.46E-04 | 2.6   | 1.6   | 3.5   |
| PC38:6      | 2.34E-04 | 1.28E-03 | 7.88E-04 |          | -2.6  | -3.1  | -1.5  |
| PE36:2      | 3.15E-05 | 3.22E-03 |          | 1.51E-04 | 3.3   | 2.1   | 4.8   |
| PE36:3      | 4.31E-07 | 2.45E-04 |          | 1.46E-04 | 3.1   | 1.9   | 4.0   |
| PE36:4      | 6.00E-08 | 1.57E-04 |          | 1.46E-04 | 4.3   | 2.6   | 5.8   |
| PEO-38:5    | 4.59E-06 | 1.22E-03 | 1.47E-04 |          | -2.2  | -3.5  | -1.5  |
| PEO-38:7    | 4.39E-07 | 9.35E-04 | 1.46E-04 |          | -3.0  | -6.9  | -2.1  |

|           |          |          |          |          |      |      |      |
|-----------|----------|----------|----------|----------|------|------|------|
| PEO-40:7  | 3.15E-05 | 7.81E-03 | 1.64E-04 |          | -2.2 | -3.8 | -1.4 |
| PI36:2    | 1.77E-08 | 2.15E-04 |          | 1.46E-04 | 2.6  | 1.5  | 3.6  |
| PI36:3    | 5.40E-05 | 1.46E-04 |          | 1.46E-04 | 1.4  | -1.4 | 1.7  |
| PI38:3    | 2.43E-05 |          | 1.51E-04 | 4.93E-03 | -1.5 | -3.8 | -2.0 |
| SMd30:1   | 1.89E-10 | 1.47E-04 |          | 1.46E-04 | 3.0  | 1.6  | 3.9  |
| SMd32:0   | 3.03E-08 | 1.49E-03 |          | 1.46E-04 | 2.4  | 1.6  | 4.2  |
| SMd36:1   | 8.33E-09 | 5.88E-04 |          | 1.46E-04 | 2.1  | 1.6  | 3.3  |
| SMd38:1   | 7.32E-09 | 1.10E-03 |          | 1.46E-04 | 1.9  | 1.3  | 3.0  |
| SMd40:1_1 | 3.31E-11 | 1.50E-04 |          | 1.46E-04 | 2.5  | 1.8  | 3.9  |
| SMd42:3   | 7.21E-06 | 1.68E-04 | 2.43E-04 |          | -2.8 | -2.8 | -1.5 |
| TG30:0    | 4.47E-03 | 1.52E-04 |          | 1.46E-04 | 2.4  | 1.8  | 3.6  |
| TG32:0    | 9.22E-07 | 1.20E-03 |          | 1.46E-04 | 3.3  | 2.0  | 5.4  |
| TG34:0    | 3.23E-07 | 1.53E-04 |          | 1.46E-04 | 4.9  | 2.5  | 5.5  |
| TG36:0    | 1.49E-07 | 2.06E-04 |          | 1.46E-04 | 4.9  | 3.1  | 7.6  |
| TG38:0    | 5.05E-06 | 2.04E-03 |          | 1.46E-04 | 3.9  | 2.9  | 6.6  |
| TG44:0    | 7.20E-09 | 2.14E-03 |          | 1.46E-04 | 2.3  | 1.8  | 4.3  |
| TG46:1    | 6.17E-09 | 3.30E-04 |          | 1.46E-04 | 2.1  | 1.7  | 3.2  |
| TG50:3    | 4.98E-06 | 8.23E-04 |          | 1.48E-04 | 2.0  | 1.3  | 2.3  |
| TG50:4    | 4.31E-07 | 1.55E-04 |          | 1.46E-04 | 2.7  | 1.6  | 2.8  |
| TG52:3    | 5.54E-04 | 4.92E-03 |          | 5.45E-03 | 1.8  | 1.0  | 1.6  |
| TG52:4    | 4.49E-05 | 2.60E-04 |          | 1.61E-03 | 2.2  | 1.1  | 1.8  |
| TG52:5    | 2.53E-04 | 3.51E-04 |          | 9.69E-03 | 2.5  | 1.2  | 1.9  |
| TG52:6    | 5.05E-06 | 3.51E-04 |          | 1.47E-04 | 3.0  | 1.7  | 3.4  |
| TG52:7    | 8.50E-07 | 1.91E-04 |          | 1.46E-04 | 2.9  | 1.5  | 3.2  |
| TG53:3    | 6.10E-04 | 5.82E-04 |          | 2.36E-03 | 2.1  | 1.5  | 1.8  |
| TG54:5    | 4.24E-05 | 1.55E-04 |          | 1.89E-03 | 2.7  | 1.5  | 1.9  |
| TG54:6    | 6.01E-06 | 1.47E-04 |          | 3.47E-04 | 3.8  | 2.0  | 2.6  |
| TG54:7    | 8.88E-06 | 1.47E-04 |          | 4.88E-04 | 5.4  | 2.9  | 3.2  |
| TG58:5    | 7.96E-05 |          | 1.23E-03 | 1.48E-04 | -2.4 | -4.4 | -4.1 |
| TGO-52:1  | 5.05E-06 | 1.46E-04 | 4.37E-04 |          | -4.9 | -4.5 | -2.3 |
| TGO-54:3  | 2.85E-04 |          | 1.46E-04 | 9.32E-04 | -2.4 | -3.6 | -2.5 |

|                    |          |          |          |          |      |      |      |
|--------------------|----------|----------|----------|----------|------|------|------|
| <b>Lyso-PC14:0</b> | 1.25E-03 | 7.98E-03 |          |          | -1.9 | -1.6 | 1.0  |
| <b>Lyso-PC16:1</b> | 2.71E-03 |          | 1.13E-03 |          | -1.5 | -1.9 | -1.3 |
| <b>Lyso-PC18:0</b> | 1.79E-05 |          |          | 1.78E-03 | -1.0 | -1.3 | 1.9  |
| <b>LysoPC22:6</b>  | 8.22E-03 |          |          | 6.54E-03 | 1.2  | 1.1  | 1.8  |
| <b>Lyso-PE18:0</b> | 1.25E-05 |          |          | 1.15E-03 | -1.3 | -1.2 | 2.6  |
| <b>PC32:2</b>      | 2.68E-03 |          |          | 1.42E-03 | 1.4  | 1.4  | 2.5  |
| <b>PC36:1</b>      | 3.86E-06 |          | 1.57E-04 |          | -1.7 | -3.1 | -1.0 |
| <b>PC36:2</b>      | 3.04E-03 |          |          | 9.68E-03 | 1.4  | -1.1 | 1.7  |
| <b>PC36:3</b>      | 2.71E-03 |          |          | 2.52E-03 | 1.6  | 1.1  | 2.0  |
| <b>PC36:4</b>      | 5.62E-04 |          |          | 3.15E-04 | 1.9  | 1.5  | 3.6  |
| <b>PC38:3</b>      | 2.89E-03 |          | 4.49E-03 |          | -1.1 | -2.5 | -1.0 |
| <b>PC38:4</b>      | 9.99E-03 |          | 4.23E-03 |          | -1.4 | -2.7 | -1.3 |
| <b>PE34:2</b>      | 9.36E-05 |          |          | 1.90E-04 | 2.0  | 1.3  | 3.5  |
| <b>PE38:4</b>      | 2.60E-03 |          |          | 9.96E-03 | 1.4  | -1.1 | 1.8  |
| <b>PEO-34:2</b>    | 2.18E-05 |          | 1.65E-04 |          | -1.9 | -3.3 | -1.2 |
| <b>PS36:2</b>      | 6.33E-03 |          |          | 8.95E-03 | 1.4  | 1.0  | 1.8  |
| <b>SMd32:1</b>     | 2.06E-05 |          |          | 1.14E-03 | 1.2  | -1.3 | 1.9  |
| <b>SMd34:0</b>     | 2.43E-04 |          | 1.65E-03 |          | -1.3 | -2.7 | 1.1  |
| <b>SMd36:2</b>     | 3.47E-03 |          | 8.34E-03 |          | -1.4 | -1.8 | -1.0 |
| <b>SMd41:1</b>     | 1.46E-08 |          |          | 1.46E-04 | 1.5  | 1.2  | 2.6  |
| <b>SMd44:1</b>     | 1.42E-03 |          | 1.46E-04 |          | -2.5 | -2.7 | -1.3 |
| <b>TG48:1</b>      | 1.03E-06 |          |          | 1.46E-04 | 1.4  | 1.2  | 2.4  |
| <b>TG50:2</b>      | 4.37E-04 |          |          | 9.30E-04 | 1.4  | -1.0 | 1.7  |
| <b>TG50:6</b>      | 4.99E-06 |          |          | 1.60E-04 | 2.2  | -1.1 | 3.4  |
| <b>TG52:1</b>      | 5.12E-04 |          |          | 8.00E-04 | 1.3  | 1.0  | 2.0  |
| <b>TG53:1</b>      | 4.32E-04 |          |          | 2.56E-04 | 1.6  | 1.3  | 2.3  |
| <b>TG54:4</b>      | 1.69E-03 | 1.01E-03 |          |          | 2.0  | 1.3  | 1.6  |
| <b>TG56:5</b>      | 8.05E-03 |          | 8.06E-03 |          | -1.5 | -2.2 | -1.8 |
| <b>TG56:6_1</b>    | 2.28E-05 |          | 1.50E-04 |          | -1.2 | -2.7 | -1.5 |
| <b>TG56:7_1</b>    | 1.62E-03 | 5.52E-04 |          |          | 2.8  | 1.5  | 1.5  |
| <b>TG56:7_2</b>    | 8.22E-04 |          | 3.07E-04 |          | -1.5 | -2.7 | -1.4 |

|                 |          |          |          |      |      |      |
|-----------------|----------|----------|----------|------|------|------|
| <b>TG56:8</b>   | 3.21E-03 |          | 6.36E-03 | 1.1  | -2.4 | -1.1 |
| <b>TG58:10</b>  | 1.42E-03 | 8.34E-03 |          | 2.4  | -1.3 | 1.6  |
| <b>TG58:7_1</b> | 2.68E-03 |          | 1.11E-03 | -1.2 | -2.1 | -1.4 |
| <b>TG58:7_2</b> | 4.59E-04 |          | 4.54E-04 | -1.3 | -2.2 | -1.1 |
| <b>TG58:8_1</b> | 7.29E-03 |          | 7.90E-03 | -1.0 | -2.0 | -1.1 |
| <b>PC30:1</b>   | 1.67E-03 |          |          | -1.9 | -2.2 | -1.3 |
| <b>PC34:2</b>   | 9.51E-03 |          |          | -1.0 | -1.3 | 1.4  |
| <b>PE36:1</b>   | 1.23E-03 |          |          | 1.1  | -1.6 | 1.6  |
| <b>PS40:6</b>   | 4.75E-03 |          |          | -2.6 | -2.9 | -1.5 |
| <b>SMd40:2</b>  | 6.37E-04 |          |          | 1.0  | -1.6 | 1.6  |
| <b>SMd42:2</b>  | 5.54E-04 |          |          | -1.3 | -1.8 | 1.2  |
| <b>TG50:1</b>   | 1.12E-03 |          |          | 1.0  | -1.4 | 1.5  |
| <b>TG54:1</b>   | 6.52E-03 |          |          | 1.1  | -1.0 | 1.9  |
| <b>TG54:7_2</b> | 2.33E-03 |          |          | 1.5  | -1.3 | 1.8  |
| <b>TG56:9</b>   | 2.33E-03 |          |          | 1.6  | -2.1 | 1.1  |
| <b>TG58:9</b>   | 3.96E-03 |          |          | 1.4  | -1.8 | 1.1  |

<sup>a</sup>Negative fold change value value means higher peak area in colostrum samples than in mature HM samples, positive fold change value means higher peak area in mature HM samples than in the colostrum samples; ns, not statistically significant; DG, diacylglycerol; MG, monoacylglycerol; PC, glycerophosphocholine; PC-O, ether analogue of glycerophosphocholine; PE, glycerophosphoethanolamine; PE-O, ether analogue of glycerophosphoethanolamine; PS, glycerophosphoserine, PI, glycerophosphoinositol; SM, sphingomyelin; TG, triacylglycerol; TGO, ether analogue of triacylglycerol.

Table S9. The complete list of lipids statistically significantly different between the colostrum and further lactation stage HM samples (Mann-Whitney test,  $p < 0.01$ , multiple testing correction: Benjamini-Hochberg colostrum vs mature HM (lactation stage other than colostrum)).

| Compound    | p (HM colostrum vs mature HM) | p (Corr) (HM colostrum vs mature HM) | Average peak area fold change colostrum (n=11) vs mature HM (n=34) |
|-------------|-------------------------------|--------------------------------------|--------------------------------------------------------------------|
| DG24:0      | 3.1E-07                       | 1.3E-06                              | -4.0                                                               |
| DG32:1      | 2.6E-06                       | 8.2E-06                              | -3.1                                                               |
| DG34:1      | 3.7E-03                       | 6.4E-03                              | -1.6                                                               |
| DG34:2      | 1.4E-05                       | 3.9E-05                              | -2.6                                                               |
| DG36:1      | 2.8E-06                       | 8.9E-06                              | -2.6                                                               |
| DG36:2      | 2.0E-06                       | 6.8E-06                              | -2.7                                                               |
| DG36:3      | 3.4E-06                       | 1.1E-05                              | -3.6                                                               |
| DG36:4      | 1.2E-08                       | 7.8E-08                              | -7.3                                                               |
| LysoPC16:0  | 7.2E-04                       | 1.4E-03                              | 1.5                                                                |
| Lyso-PC16:1 | 3.2E-03                       | 5.5E-03                              | 1.5                                                                |
| Lyso-PC18:2 | 8.1E-06                       | 2.3E-05                              | -2.2                                                               |
| lyso-PC18:3 | 1.8E-06                       | 6.0E-06                              | -3.2                                                               |
| LysoPE18:2  | 1.5E-10                       | 4.1E-09                              | -3.9                                                               |
| PC24:0      | 1.4E-03                       | 2.5E-03                              | -1.1                                                               |
| PC29:0      | 3.5E-04                       | 7.4E-04                              | 2.0                                                                |
| PC30:0      | 1.6E-06                       | 5.5E-06                              | 2.7                                                                |
| PC30:1      | 2.3E-03                       | 4.1E-03                              | 1.6                                                                |
| PC31:0      | 9.4E-10                       | 1.2E-08                              | 3.1                                                                |
| PC32:0      | 2.6E-09                       | 2.3E-08                              | 2.8                                                                |
| PC32:1      | 5.0E-05                       | 1.2E-04                              | 2.0                                                                |
| PC33:0      | 3.0E-07                       | 1.3E-06                              | 2.7                                                                |
| PC33:1      | 5.2E-04                       | 1.1E-03                              | 1.8                                                                |
| PC34:0      | 1.3E-06                       | 4.6E-06                              | 2.2                                                                |
| PC34:1      | 8.0E-04                       | 1.5E-03                              | 1.6                                                                |
| PC35:1      | 9.2E-04                       | 1.7E-03                              | 2.6                                                                |
| PC36:4      | 1.9E-03                       | 3.5E-03                              | -2.5                                                               |
| PC38:6      | 1.1E-03                       | 2.0E-03                              | 2.1                                                                |
| PCO-34:1    | 1.2E-10                       | 4.1E-09                              | 3.6                                                                |
| PE34:2      | 1.2E-03                       | 2.2E-03                              | -2.4                                                               |
| PE36:0      | 2.2E-07                       | 9.8E-07                              | -1.0                                                               |
| PE36:2      | 2.0E-05                       | 5.0E-05                              | -3.6                                                               |
| PE36:3      | 1.9E-05                       | 4.9E-05                              | -3.2                                                               |
| PE36:4      | 7.4E-06                       | 2.1E-05                              | -4.5                                                               |
| PEO-34:2    | 2.5E-03                       | 4.3E-03                              | 1.7                                                                |
| PEO-36:5    | 7.3E-07                       | 2.8E-06                              | 2.6                                                                |
| PEO-38:5    | 1.8E-04                       | 4.1E-04                              | 2.0                                                                |
| PEO-38:7    | 3.7E-06                       | 1.1E-05                              | 3.0                                                                |
| PEO-40:7    | 5.6E-04                       | 1.1E-03                              | 2.0                                                                |
| PI36:1      | 7.0E-09                       | 4.9E-08                              | -3.1                                                               |
| PI36:2      | 8.1E-06                       | 2.3E-05                              | -2.7                                                               |
| PI38:3      | 1.1E-04                       | 2.5E-04                              | 2.1                                                                |



---

|                 |         |         |       |
|-----------------|---------|---------|-------|
| PI38:4          | 2.9E-09 | 2.5E-08 | 4.0   |
| PS36:1          | 8.4E-08 | 4.3E-07 | 3.1   |
| PS40:6          | 6.9E-04 | 1.4E-03 | 2.1   |
| SMd30:1         | 1.6E-07 | 7.3E-07 | -3.0  |
| SMd32:0         | 3.9E-06 | 1.2E-05 | -2.9  |
| SMd33:1/SMt32:2 | 2.3E-07 | 1.0E-06 | 2.4   |
| SMd34:1         | 3.6E-06 | 1.1E-05 | 2.1   |
| SMd34:2         | 8.9E-08 | 4.3E-07 | 2.6   |
| SMd36:0         | 2.6E-09 | 2.3E-08 | -4.4  |
| SMd36:1         | 4.9E-07 | 2.0E-06 | -2.5  |
| SMd38:0         | 2.0E-03 | 3.7E-03 | -7.5  |
| SMd38:1         | 1.1E-06 | 4.1E-06 | -2.2  |
| SMd39:0         | 1.3E-07 | 6.0E-07 | 1.1   |
| SMd40:1_1       | 4.9E-09 | 3.7E-08 | -2.9  |
| SMd40:1_2       | 9.7E-05 | 2.2E-04 | 1.9   |
| SMd41:1         | 4.0E-05 | 9.8E-05 | -1.9  |
| SMd42:0         | 1.6E-10 | 4.1E-09 | -5.8  |
| SMd42:3         | 2.0E-05 | 5.0E-05 | 2.1   |
| SMd43:2         | 7.4E-05 | 1.7E-04 | 16.0  |
| SMt34:1         | 5.1E-10 | 8.0E-09 | 9.6   |
| SMt42:1         | 7.8E-09 | 5.4E-08 | 3.2   |
| TG32:0          | 9.3E-07 | 3.5E-06 | -3.8  |
| TG33:1          | 7.2E-04 | 1.4E-03 | -3.0  |
| TG34:0          | 1.1E-06 | 4.0E-06 | -4.5  |
| TG34:1          | 5.8E-08 | 3.1E-07 | -11.0 |
| TG36:0          | 6.2E-06 | 1.8E-05 | -5.5  |
| TG36:1          | 6.9E-10 | 9.6E-09 | -8.3  |
| TG37:0          | 3.3E-04 | 6.9E-04 | -4.7  |
| TG38:0          | 1.7E-05 | 4.3E-05 | -4.7  |
| TG38:1          | 4.1E-11 | 4.1E-09 | -7.7  |
| TG38:2          | 6.0E-11 | 4.1E-09 | -8.9  |
| TG38:3          | 2.1E-05 | 5.4E-05 | -8.9  |
| TG39:0          | 8.4E-08 | 4.3E-07 | -9.4  |
| TG39:1          | 2.0E-10 | 4.6E-09 | -9.3  |
| TG40:0          | 6.0E-07 | 2.3E-06 | -5.0  |
| TG40:1          | 1.1E-10 | 4.1E-09 | -6.9  |
| TG40:2          | 1.2E-10 | 4.1E-09 | -8.9  |
| TG40:3          | 2.1E-10 | 4.6E-09 | -8.5  |
| TG41:0          | 2.8E-08 | 1.6E-07 | -5.6  |
| TG41:1          | 4.7E-07 | 1.9E-06 | -6.6  |
| TG42:0          | 4.4E-07 | 1.9E-06 | -4.0  |
| TG42:1          | 1.3E-09 | 1.4E-08 | -5.5  |
| TG42:2          | 1.4E-09 | 1.4E-08 | -7.9  |
| TG42:3          | 5.8E-10 | 8.5E-09 | -10.6 |
| TG43:0          | 2.4E-08 | 1.4E-07 | -3.7  |
| TG43:1          | 1.8E-09 | 1.8E-08 | -5.9  |
| TG44:0          | 8.9E-08 | 4.3E-07 | -2.9  |
| TG44:1          | 4.9E-09 | 3.7E-08 | -3.9  |

---

---

|          |         |         |       |
|----------|---------|---------|-------|
| TG44:2   | 4.8E-10 | 8.0E-09 | -5.6  |
| TG44:3   | 2.6E-08 | 1.5E-07 | -8.1  |
| TG46:1   | 1.3E-06 | 4.4E-06 | -2.5  |
| TG46:2   | 1.5E-09 | 1.5E-08 | -3.6  |
| TG46:3   | 9.4E-10 | 1.2E-08 | -5.6  |
| TG46:4   | 8.3E-11 | 4.1E-09 | -10.8 |
| TG47:3   | 9.3E-06 | 2.6E-05 | -4.4  |
| TG48:1   | 1.9E-04 | 4.2E-04 | -1.7  |
| TG48:2   | 8.0E-08 | 4.2E-07 | -2.4  |
| TG48:3   | 3.1E-09 | 2.6E-08 | -3.6  |
| TG48:4   | 4.4E-09 | 3.5E-08 | -4.7  |
| TG48:5   | 2.4E-08 | 1.4E-07 | -9.3  |
| TG50:3   | 1.5E-04 | 3.3E-04 | -1.9  |
| TG50:4   | 8.9E-06 | 2.5E-05 | -2.5  |
| TG50:5   | 4.5E-04 | 9.4E-04 | -3.1  |
| TG50:6   | 2.0E-03 | 3.7E-03 | -2.3  |
| TG51:3   | 3.5E-04 | 7.4E-04 | 2.2   |
| TG52:1   | 4.6E-03 | 7.7E-03 | -1.5  |
| TG52:4   | 1.5E-03 | 2.8E-03 | -1.7  |
| TG52:5   | 4.5E-03 | 7.5E-03 | -1.9  |
| TG52:6   | 2.3E-05 | 5.8E-05 | -2.8  |
| TG52:7   | 4.2E-05 | 1.0E-04 | -2.7  |
| TG53:1   | 3.3E-05 | 8.0E-05 | -1.9  |
| TG53:3   | 2.5E-04 | 5.4E-04 | -1.8  |
| TG54:4   | 6.9E-04 | 1.4E-03 | -1.6  |
| TG54:5   | 8.1E-05 | 1.9E-04 | -2.0  |
| TG54:6   | 6.2E-06 | 1.8E-05 | -2.7  |
| TG54:7   | 2.5E-06 | 8.1E-06 | -3.7  |
| TG56:5   | 4.1E-03 | 6.9E-03 | 1.8   |
| TG56:6_1 | 2.3E-03 | 4.0E-03 | 1.6   |
| TG58:2   | 1.2E-09 | 1.4E-08 | 4.4   |
| TG58:3   | 3.0E-05 | 7.4E-05 | 2.2   |
| TG58:4   | 1.0E-05 | 2.7E-05 | 2.7   |
| TG58:5   | 1.2E-04 | 2.7E-04 | 3.5   |
| TG58:6   | 6.0E-07 | 2.3E-06 | 2.4   |
| TG60:2   | 1.1E-08 | 7.2E-08 | 5.2   |
| TG60:3   | 9.9E-06 | 2.7E-05 | -31.9 |
| TG60:4   | 4.7E-04 | 9.6E-04 | 4.8   |
| TG62:3   | 1.1E-06 | 4.1E-06 | 24.5  |
| TG62:4   | 1.0E-08 | 6.9E-08 | 21.9  |
| TG62:5   | 6.7E-04 | 1.3E-03 | 18.2  |
| TG62:6   | 2.5E-10 | 4.9E-09 | 9.3   |
| TG62:8   | 4.6E-03 | 7.7E-03 | 19.9  |
| TG64:4   | 3.8E-08 | 2.1E-07 | 14.4  |
| TG64:6   | 1.6E-07 | 7.3E-07 | 12.8  |
| TG64:8   | 6.8E-09 | 4.9E-08 | 23.6  |
| TGO-50:1 | 1.3E-03 | 2.5E-03 | 4.5   |
| TGO-52:1 | 3.1E-03 | 5.3E-03 | 3.2   |

---

|                 |         |         |     |
|-----------------|---------|---------|-----|
| <b>TGO-52:2</b> | 4.8E-10 | 8.0E-09 | 3.5 |
| <b>TGO-54:2</b> | 3.1E-04 | 6.7E-04 | 2.6 |

<sup>a</sup>Positive fold change value means higher peak area in colostrum samples than in mature HM samples, negative fold change value means higher peak area in mature HM samples than in the colostrum samples; DG, diacylglycerol; PC, glycerophosphocholine; PC-O, ether analogue of glycerophosphocholine; PE, glycerophosphoethanolamine; PE-O, ether analogue of glycerophosphoethanolamine; PS, glycerophosphoserine, PI, glycerophosphoinositol; SM, sphingomyelin; TG, triacylglycerol; TG-O, ether analogue of triacylglycerol; ns – not statistically significant change.

**Table S10. The complete list of statistically significantly (p<0.01) different lipids between the samples of caprine whole milk-based FM and FM supplemented with soy lecithin accordingly to the Mann-Whitney test unpaired (multiple testing correction: Benjamini-Hochberg).**

| <b>Compound</b> | <b>p (Corr) caprine whole milk vs soy lecithin</b> | <b>Average peak area fold change caprine whole milk based FM (n=7) vs soy lecithin supplemented FM (n=13)</b> |
|-----------------|----------------------------------------------------|---------------------------------------------------------------------------------------------------------------|
| <b>TG30:1</b>   | 1.2E-05                                            | 83.4                                                                                                          |
| <b>TG40:3</b>   | 2.7E-06                                            | 57.1                                                                                                          |
| <b>TG43:1</b>   | 2.7E-06                                            | 54.9                                                                                                          |
| <b>TG39:1</b>   | 2.7E-06                                            | 41.1                                                                                                          |
| <b>TG41:1</b>   | 1.2E-05                                            | 41.0                                                                                                          |
| <b>TG34:2</b>   | 2.7E-06                                            | 37.5                                                                                                          |
| <b>TG41:0</b>   | 2.7E-06                                            | 35.1                                                                                                          |
| <b>TG34:1</b>   | 2.7E-06                                            | 31.7                                                                                                          |
| <b>TG42:3</b>   | 1.2E-05                                            | 31.5                                                                                                          |
| <b>TG38:3</b>   | 2.7E-06                                            | 31.1                                                                                                          |
| <b>TG39:0</b>   | 2.7E-06                                            | 29.8                                                                                                          |
| <b>TG32:1</b>   | 9.0E-04                                            | 25.8                                                                                                          |
| <b>TG33:0</b>   | 2.2E-04                                            | 21.9                                                                                                          |
| <b>TG35:0</b>   | 3.8E-06                                            | 17.8                                                                                                          |
| <b>TG46:3</b>   | 2.7E-06                                            | 17.6                                                                                                          |
| <b>TG40:2</b>   | 2.7E-06                                            | 17.3                                                                                                          |
| <b>TG43:0</b>   | 2.7E-06                                            | 17.2                                                                                                          |
| <b>TG44:2</b>   | 2.7E-06                                            | 14.4                                                                                                          |
| <b>TG37:0</b>   | 8.1E-06                                            | 13.9                                                                                                          |
| <b>SMd28:1</b>  | 1.2E-05                                            | 12.7                                                                                                          |
| <b>TG38:2</b>   | 2.7E-06                                            | 12.4                                                                                                          |
| <b>TG36:1</b>   | 2.7E-06                                            | 12.1                                                                                                          |
| <b>SMd38:1</b>  | 2.2E-05                                            | 11.1                                                                                                          |
| <b>TG44:3</b>   | 2.7E-06                                            | 9.3                                                                                                           |
| <b>TG46:2</b>   | 2.7E-06                                            | 8.6                                                                                                           |
| <b>TG42:2</b>   | 5.4E-06                                            | 8.0                                                                                                           |
| <b>TG38:1</b>   | 2.7E-06                                            | 7.4                                                                                                           |
| <b>SMd36:1</b>  | 7.0E-06                                            | 6.8                                                                                                           |
| <b>TG44:1</b>   | 2.7E-06                                            | 6.3                                                                                                           |
| <b>TG53:1</b>   | 2.7E-06                                            | 4.2                                                                                                           |
| <b>SMd36:2</b>  | 2.4E-05                                            | 3.5                                                                                                           |

---

|                 |         |      |
|-----------------|---------|------|
| TG42:1          | 1.8E-05 | 3.5  |
| TG46:1          | 5.4E-06 | 3.1  |
| TG42:0          | 1.2E-04 | 3.1  |
| SMd40:1_1       | 1.5E-04 | 3.0  |
| TG44:0          | 2.2E-04 | 2.6  |
| TG48:3          | 2.4E-05 | 2.6  |
| TG48:4          | 2.9E-05 | 2.4  |
| TG55:2          | 8.1E-06 | 2.3  |
| TG48:1          | 1.3E-05 | 2.3  |
| PEO-34:2        | 5.6E-04 | 2.1  |
| SMd41:2         | 3.6E-03 | 2.1  |
| SMd42:2         | 1.3E-04 | 2.1  |
| SMd36:0         | 2.7E-03 | 2.0  |
| TG38:0          | 4.1E-04 | 2.0  |
| PCO-34:1        | 6.0E-03 | 1.9  |
| SMd41:1         | 1.3E-03 | 1.9  |
| SMt34:1         | 4.7E-03 | 1.8  |
| PC34:0          | 5.1E-04 | 1.8  |
| TG53:2          | 1.4E-04 | 1.7  |
| TG48:2          | 1.2E-03 | 1.7  |
| TG50:3          | 1.2E-03 | 1.6  |
| TG50:4          | 1.5E-04 | 1.5  |
| TG56:3          | 5.6E-03 | -1.4 |
| TG56:4          | 4.3E-03 | -1.4 |
| TG54:4          | 2.3E-03 | -1.4 |
| TG54:5          | 7.5E-04 | -1.5 |
| TG52:4          | 1.1E-04 | -1.6 |
| TG56:5          | 2.3E-03 | -1.6 |
| TG54:6          | 4.1E-04 | -1.6 |
| TG54:3          | 6.5E-03 | -1.6 |
| PC24:0          | 4.3E-03 | -1.6 |
| TG58:3          | 1.9E-03 | -1.6 |
| SMd33:1/SMt32:2 | 9.0E-04 | -1.8 |
| PC26:0          | 1.3E-03 | -1.8 |
| DG36:2          | 3.4E-04 | -1.9 |
| TG60:2          | 9.3E-03 | -1.9 |
| DG36:4          | 3.1E-04 | -2.1 |
| DG36:3          | 5.6E-04 | -2.1 |
| PC32:1          | 1.7E-04 | -2.1 |
| LysoPE18:1      | 1.1E-03 | -2.2 |
| TG52:5          | 8.8E-06 | -2.3 |
| LysoPC18:0      | 1.5E-04 | -2.4 |
| LysoPC16:0      | 1.1E-03 | -2.4 |
| PC32:2          | 1.2E-04 | -2.4 |
| SMd40:1_2       | 1.5E-04 | -2.6 |
| TG52:6          | 4.7E-05 | -2.7 |
| PC30:0          | 2.9E-05 | -2.7 |
| TG54:7          | 1.4E-05 | -2.9 |

---

|                   |         |                                      |
|-------------------|---------|--------------------------------------|
| <b>LysoPE18:2</b> | 2.0E-04 | -2.9                                 |
| <b>PC34:3</b>     | 4.1E-04 | -2.9                                 |
| <b>SMd34:0</b>    | 2.0E-05 | -3.0                                 |
| <b>SMd39:2</b>    | 8.1E-06 | -3.1                                 |
| <b>TG54:8</b>     | 1.4E-05 | -3.1                                 |
| <b>LysoPC18:1</b> | 9.0E-04 | -3.2                                 |
| <b>PC38:4</b>     | 6.8E-05 | -3.2                                 |
| <b>PC30:1</b>     | 8.8E-06 | -3.5                                 |
| <b>PC28:0</b>     | 7.8E-06 | -3.5                                 |
| <b>SMd39:1</b>    | 3.0E-06 | -4.4                                 |
| <b>PC29:0</b>     | 3.8E-06 | -4.5                                 |
| <b>LysoPC16:1</b> | 4.2E-05 | -4.6                                 |
| <b>PE36:4</b>     | 2.7E-03 | -4.7                                 |
| <b>PC36:4</b>     | 1.8E-04 | -5.8                                 |
| <b>LysoPC14:0</b> | 2.9E-05 | -6.2                                 |
| <b>lysoPC12:0</b> | 1.3E-04 | -6.4                                 |
| <b>LysoPC18:2</b> | 2.0E-05 | -6.5                                 |
| <b>PI34:2</b>     | 2.2E-05 | -10.3                                |
| <b>SMd32:0</b>    | 2.7E-06 | -10.5                                |
| <b>lysoPC18:3</b> | 1.3E-05 | -12.0                                |
| <b>PC36:5</b>     | 2.7E-06 | -20.8                                |
| <b>SMd38:0</b>    | 6.2E-04 | -23.0                                |
| <b>PI34:3</b>     | 3.0E-05 | -31.4                                |
| <b>TG58:9</b>     | 3.3E-04 | -38.3                                |
| <b>TG60:12</b>    | 1.2E-04 | nd in caprine whole milk based<br>FM |

<sup>a</sup>Negative fold change value means higher peak area in the soy lecithin supplemented FM samples than in the caprine whole milk based FM samples, positive fold change value means higher peak area in caprine whole milk based FM samples than in the soy lecithin supplemented FM; DG, diacylglycerol; PC, glycerophosphocholine; PC-O, ether analogue of glycerophosphocholine; PE, glycerophosphoethanolamine; PE-O, ether analogue of glycerophosphoethanolamine; PS, glycerophosphoserine, PI, glycerophosphoinositol; SM, sphingomyelin; TG, triacylglycerol; TG-O, ether analogue of triacylglycerol; nd, not detected; ns – not statistically significant change

Table S11. The complete list of lipids indicating a statistically significant ( $p < 0.01$ , multiple testing correction: Benjamini-Hochberg) difference between HM and FM samples in the different lactation stages and age range targets.

| Lipid name | p colostrum<br>(n=11) vs FM<br>0-6 mo. (n=8) | Average peak<br>area fold<br>change<br>colostrum<br>(n=11) vs FM<br>0-6 mo. (n=8) | p HM 0-6 mo.<br>(n=10) vs FM<br>0-6 mo. (n=8) | Average peak<br>area fold<br>change HM 0-<br>6 mo. (n=10)<br>vs FM 0-6 mo.<br>(n=8) | p HM 6- 12<br>mo. (n=8) vs<br>FM 6-12 mo.<br>(n=7) | Average peak<br>area fold<br>change HM 6-<br>12 mo. (n=8)<br>vs FM 6-12<br>mo. (n=7) | p HM > 12 mo.<br>(n=16) vs FM ><br>12 mo. (n=5) | Average peak<br>area fold<br>change HM ><br>12 mo. (n=16)<br>vs FM > 12<br>mo. (n=5) |
|------------|----------------------------------------------|-----------------------------------------------------------------------------------|-----------------------------------------------|-------------------------------------------------------------------------------------|----------------------------------------------------|--------------------------------------------------------------------------------------|-------------------------------------------------|--------------------------------------------------------------------------------------|
| DG24:0     | 1.2E-04                                      | -9.8                                                                              |                                               | -2.4                                                                                |                                                    |                                                                                      |                                                 |                                                                                      |
| DG32:1     |                                              | 1.2                                                                               | 1.3E-04                                       | 3.5                                                                                 | 7.8E-05                                            | 5.0                                                                                  | 9.5E-05                                         | 4.1                                                                                  |
| DG34:2     | 4.3E-04                                      | -3.3                                                                              |                                               | -1.1                                                                                |                                                    |                                                                                      | 9.4E-03                                         | -1.8                                                                                 |
| DG36:1     | 1.2E-04                                      | -3.8                                                                              |                                               | -1.8                                                                                |                                                    |                                                                                      |                                                 |                                                                                      |
| DG36:2     | 1.2E-04                                      | -5.0                                                                              |                                               | -1.8                                                                                |                                                    |                                                                                      | 9.6E-04                                         | -2.6                                                                                 |
| DG36:3     | 1.2E-04                                      | -7.2                                                                              |                                               | -1.6                                                                                |                                                    |                                                                                      |                                                 |                                                                                      |
| DG36:4     | 1.2E-04                                      | -23.0                                                                             |                                               | -2.6                                                                                | 5.4E-04                                            | -2.6                                                                                 | 3.8E-05                                         | -4.1                                                                                 |
| LysoPC12:0 | 1.2E-04                                      | -3.6                                                                              |                                               | -3.7                                                                                |                                                    |                                                                                      | 1.4E-04                                         | -3.3                                                                                 |
| LysoPC14:0 |                                              | -1.7                                                                              | 1.0E-03                                       | -3.1                                                                                |                                                    |                                                                                      | 8.2E-03                                         | -2.1                                                                                 |
| LysoPC16:0 |                                              | 1.8                                                                               |                                               | 1.0                                                                                 |                                                    |                                                                                      |                                                 |                                                                                      |
| LysoPC18:0 | 2.2E-04                                      | 2.9                                                                               | 4.0E-04                                       | 2.7                                                                                 | 2.3E-04                                            | 4.0                                                                                  | 2.8E-05                                         | 5.4                                                                                  |
| LysoPC18:3 | 2.5E-04                                      | -5.2                                                                              |                                               | -1.8                                                                                |                                                    |                                                                                      | 4.5E-03                                         | -2.5                                                                                 |
| LysoPC22:6 | 1.2E-04                                      | 12.2                                                                              | 1.2E-04                                       | 15.1                                                                                |                                                    |                                                                                      |                                                 |                                                                                      |
| LysoPE18:0 | 1.2E-04                                      | 9.2                                                                               | 1.2E-04                                       | 7.1                                                                                 | 6.5E-05                                            | 12.7                                                                                 | 2.8E-05                                         | 26.9                                                                                 |
| LysoPE18:2 |                                              | -1.2                                                                              | 2.5E-04                                       | 2.8                                                                                 | 5.4E-04                                            | 4.2                                                                                  | 3.1E-04                                         | 2.8                                                                                  |
| PA46:3     | 1.2E-04                                      | -23.7                                                                             | 1.2E-04                                       | nd in HM                                                                            | 3.4E-04                                            | nd in HM                                                                             |                                                 |                                                                                      |
| PC24:0     | 1.2E-04                                      | -16.5                                                                             | 1.3E-04                                       | -16.5                                                                               |                                                    |                                                                                      |                                                 |                                                                                      |
| PC26:0     | 1.2E-04                                      | -9.1                                                                              | 3.9E-04                                       | -13.0                                                                               | 1.1E-04                                            | -10.0                                                                                | 1.5E-04                                         | -7.1                                                                                 |
| PC28:0     | 1.2E-04                                      | -5.4                                                                              | 1.2E-04                                       | -9.6                                                                                | 1.2E-04                                            | -5.3                                                                                 | 2.8E-04                                         | -4.8                                                                                 |
| PC29:0     | 1.2E-04                                      | -5.8                                                                              | 1.2E-04                                       | -15.0                                                                               | 1.1E-04                                            | -8.2                                                                                 | 1.4E-04                                         | -8.4                                                                                 |
| PC30:0     |                                              | -1.4                                                                              | 1.2E-04                                       | -4.8                                                                                | 1.9E-03                                            | -2.6                                                                                 | 1.8E-03                                         | -2.4                                                                                 |
| PC30:1     | 1.3E-04                                      | -2.3                                                                              | 1.3E-04                                       | -4.3                                                                                | 1.4E-03                                            | -3.0                                                                                 | 2.0E-04                                         | -2.5                                                                                 |
| PC31:0     |                                              | -1.2                                                                              | 1.2E-04                                       | -3.9                                                                                | 4.2E-04                                            | -3.3                                                                                 | 1.0E-04                                         | -3.0                                                                                 |

|          |         |       |         |       |         |          |         |          |
|----------|---------|-------|---------|-------|---------|----------|---------|----------|
| PC32:0   | 1.3E-04 | 2.3   |         | -1.2  |         |          |         |          |
| PC32:1   |         | -1.2  | 1.5E-04 | -2.9  | 4.1E-03 | -2.1     |         |          |
| PC32:2   | 4.4E-03 | -2.7  |         | -2.0  |         |          |         |          |
| PC33:0   |         | -1.8  | 1.2E-04 | -4.7  | 8.9E-05 | -5.6     | 6.2E-05 | -3.5     |
| PC33:1   | 1.3E-04 | -2.7  | 1.2E-04 | -5.5  | 8.9E-05 | -4.1     | 2.0E-04 | -2.9     |
| PC33:2   | 2.9E-03 | -2.4  |         | -2.1  |         |          |         |          |
| PC34:0   | 1.2E-04 | 2.9   |         | 1.4   |         |          | 2.2E-03 | 2.5      |
| PC34:1   |         | 1.3   |         | -1.4  |         |          |         |          |
| PC34:3   | 9.0E-04 | -3.1  | 1.3E-03 | -3.1  | 5.0E-04 | -4.0     |         |          |
| PC35:1   |         | 1.3   |         | -3.0  |         |          |         |          |
| PC36:1   |         | 1.4   |         | -1.2  |         |          | 6.4E-03 | 2.0      |
| PC36:2   |         | 1.5   | 3.6E-03 | 2.0   |         |          | 2.5E-04 | 3.7      |
| PC36:4   | 1.2E-04 | -11.8 | 8.6E-04 | -6.3  | 1.0E-03 | -6.4     | 3.4E-03 | -3.7     |
| PC36:5   | 1.2E-04 | -36.4 | 1.3E-04 | -13.9 | 1.5E-04 | -16.5    | 9.5E-05 | -15.4    |
| PC38:3   | 1.2E-04 | 5.7   | 1.2E-04 | 5.3   |         |          | 2.0E-03 | 9.3      |
| PC38:4   |         |       |         |       |         |          | 6.9E-03 | 2.1      |
| PC38:6   | 1.2E-04 | 13.6  | 1.2E-04 | 5.1   |         |          |         |          |
| PCO-34:1 | 1.2E-04 | 5.7   | 9.0E-03 | 1.6   |         |          |         |          |
| PE34:2   | 2.0E-03 | -4.2  |         | -2.1  |         |          |         |          |
| PE36:1   | 5.9E-03 | 2.0   | 1.3E-03 | 2.2   |         |          |         |          |
| PE36:2   |         | -1.4  |         | 2.4   | 8.7E-03 | 2.6      |         |          |
| PE36:3   |         | -1.6  |         | 1.9   |         |          |         |          |
| PE36:4   | 1.2E-04 | -15.2 |         | -3.5  | 4.5E-03 | -4.4     |         |          |
| PE38:4   |         | 1.6   | 1.6E-03 | 2.2   |         |          |         |          |
| PE40:4   | 1.2E-04 | 21.9  | 3.4E-04 | 10.0  |         |          |         |          |
| PEO-34:2 | 1.2E-04 | 7.6   | 1.2E-04 | 4.0   | 6.4E-04 | 3.8      | 3.8E-05 | 11.7     |
| PEO-36:5 | 1.2E-04 | 33.5  | 1.2E-04 | 11.9  | 5.4E-04 | 12.0     | 8.8E-03 | 25.4     |
| PEO-38:5 | 1.2E-04 | 28.5  | 1.2E-04 | 12.7  |         |          |         |          |
| PEO-38:7 | 1.2E-04 | 79.9  | 1.2E-04 | 26.6  | 1.9E-03 | nd in FM | 2.8E-05 | nd in FM |
| PEO-40:7 | 1.2E-04 | 41.1  | 1.2E-04 | 18.4  |         |          | 2.8E-05 | nd in FM |
| PI34:2   | 1.2E-04 | -12.5 | 1.2E-04 | -8.2  |         |          | 1.1E-03 | -10.5    |

|                     |         |       |         |          |         |          |         |          |
|---------------------|---------|-------|---------|----------|---------|----------|---------|----------|
| PI34:3              | 1.2E-04 | -12.9 | 1.2E-04 | nd in HM | 4.5E-03 | nd in HM | 4.9E-06 | nd in HM |
| PI36:1              | 5.1E-04 | -2.3  |         | 1.1      |         |          | 1.3E-04 | 2.4      |
| PI36:2              |         | -1.8  |         | 1.5      |         |          | 1.7E-04 | 2.6      |
| PI36:4              | 1.2E-04 | -14.7 | 1.2E-04 | -14.9    | 5.5E-03 | nd in HM |         |          |
| PI38:3              | 1.2E-04 | 5.9   | 1.2E-04 | 3.9      |         |          | 1.7E-03 | 4.4      |
| PI38:4              | 1.2E-04 | 10.7  | 2.0E-04 | 3.1      | 2.6E-04 | 2.6      |         |          |
| PS36:1              | 1.2E-04 | 3.5   |         | 1.1      |         |          |         |          |
| PS36:2              | 1.2E-04 | 3.4   | 1.2E-04 | 4.8      | 1.7E-04 | 6.9      | 4.3E-05 | 8.6      |
| PS40:6              | 1.2E-04 | 25.0  | 1.2E-04 | 9.7      |         |          | 5.8E-03 | 3.3      |
| SMd28:1             | 1.2E-04 | -2.0  |         | 3.0      |         |          | 1.8E-03 | 8.0      |
| SMd30:1             |         | -1.3  | 2.2E-04 | 2.3      |         |          | 5.1E-05 | 4.5      |
| SMd32:0             | 6.7E-04 | -3.5  |         | -1.4     |         |          |         |          |
| SMd32:1             |         |       |         |          |         |          | 1.4E-03 | 2.2      |
| SMd32:2             | 1.2E-04 | 5.7   | 1.2E-04 | 4.6      |         |          |         |          |
| SMd33:1/SMt<br>32:2 |         | -1.4  | 1.2E-04 | -3.6     | 1.2E-04 | -3.0     | 3.8E-05 | -2.4     |
| SMd34:0             |         |       |         |          |         |          | 5.2E-04 | 2.0      |
| SMd34:1             | 1.3E-04 | 2.2   |         | -1.1     |         |          | 4.1E-03 | 1.9      |
| SMd34:2             | 1.2E-04 | 3.3   |         | 1.1      |         |          | 1.5E-03 | 1.9      |
| SMd36:0             | 1.2E-04 | 5.8   | 1.2E-04 | 18.2     | 1.1E-04 | 30.9     | 2.8E-05 | 73.5     |
| SMd36:1             | 1.2E-04 | 6.0   | 1.2E-04 | 12.8     | 1.1E-04 | 14.0     | 2.9E-05 | 54.0     |
| SMd36:2             | 1.2E-04 | 4.9   | 1.2E-04 | 3.6      | 5.4E-04 | 4.5      | 3.7E-05 | 8.4      |
| SMd38:0             | 1.2E-04 | -30.4 |         | -4.0     |         |          |         |          |
| SMd38:1             | 1.2E-04 | 39.6  | 1.2E-04 | 77.1     | 6.5E-05 | 112.6    | 4.7E-04 | 227.5    |
| SMd39:0             | 1.2E-04 | -14.6 | 2.1E-04 | -16.3    |         |          |         |          |
| SMd39:1             | 1.4E-03 | -11.1 | 1.2E-04 | -15.9    |         |          | 2.6E-03 | -8.6     |
| SMd39:2             | 1.2E-04 | -15.5 | 1.2E-04 | -17.0    |         |          | 6.6E-03 | -4.0     |
| SMd40:0             | 1.2E-04 | -28.3 | 1.2E-04 | -19.5    | 7.4E-03 | -23.6    | 5.8E-05 | nd in HM |
| SMd40:1_1           | 1.2E-04 | 2.8   | 1.2E-04 | 7.0      | 1.1E-04 | 9.1      | 2.9E-05 | 19.6     |
| SMd40:1_2           |         |       |         |          | 5.1E-03 | nd in HM |         |          |
| SMd40:2             | 1.4E-03 | 2.2   | 1.2E-03 | 2.3      |         |          | 3.8E-05 | 5.2      |



|                |         |          |         |          |         |          |         |          |
|----------------|---------|----------|---------|----------|---------|----------|---------|----------|
| <b>SMd41:1</b> | 1.3E-04 | -2.2     |         | -1.4     |         |          | 8.8E-03 | 1.9      |
| <b>SMd41:2</b> |         | -1.5     | 5.6E-04 | -3.3     |         |          |         |          |
| <b>SMd42:0</b> |         | -1.0     | 2.6E-04 | 3.5      | 1.1E-04 | 7.4      | 2.8E-05 | 15.2     |
| <b>SMd42:1</b> | 1.2E-04 | 7.6      | 1.2E-04 | 7.4      |         |          |         |          |
| <b>SMd42:2</b> | 1.2E-04 | 24.4     | 1.2E-04 | 18.8     | 1.1E-04 | 22.3     | 2.8E-05 | 45.1     |
| <b>SMd42:3</b> | 1.2E-04 | 108.3    | 1.2E-04 | 39.2     |         |          |         |          |
| <b>SMd43:2</b> |         | 5.6      | 5.0E-03 | -16.0    |         |          |         |          |
| <b>SMd44:1</b> |         | 1.9      |         | -1.3     |         |          |         |          |
| <b>SMd44:2</b> | 1.2E-04 | nd in FM | 4.2E-04 | nd in FM |         |          |         |          |
| <b>SMT34:1</b> | 1.2E-04 | 6.8      |         | -1.6     |         |          |         |          |
| <b>SMT42:1</b> | 1.2E-04 | 123.0    | 1.2E-04 | 32.7     |         |          | 2.8E-05 | nd in FM |
| <b>TG28:0</b>  | 1.2E-04 | -123.4   | 1.2E-04 | -66.8    |         |          | 3.4E-03 | -6.0     |
| <b>TG30:0</b>  | 1.2E-04 | -229.7   | 1.2E-04 | -96.9    |         |          |         |          |
| <b>TG31:0</b>  | 1.2E-04 | -31.9    | 1.2E-04 | -19.9    | 3.0E-03 | nd in HM |         |          |
| <b>TG32:0</b>  | 1.2E-04 | -171.1   | 1.2E-04 | -51.7    | 1.1E-04 | -67.4    |         |          |
| <b>TG32:1</b>  | 1.2E-04 | -172.6   | 1.7E-04 | -17.4    |         |          |         |          |
| <b>TG33:0</b>  | 1.2E-04 | -72.5    | 1.2E-04 | -29.1    | 2.8E-04 | nd in HM |         |          |
| <b>TG33:1</b>  | 1.6E-03 | -3.5     |         | 1.0      |         |          |         |          |
| <b>TG34:0</b>  | 1.2E-04 | -117.5   | 1.2E-04 | -23.8    | 1.1E-04 | -37.8    |         |          |
| <b>TG34:1</b>  | 1.2E-04 | -33.2    |         | -3.3     |         |          |         |          |
| <b>TG34:2</b>  | 1.2E-04 | -30.6    |         | -2.1     |         |          |         |          |
| <b>TG35:0</b>  | 1.2E-04 | -62.3    | 1.2E-04 | -19.8    |         |          |         |          |
| <b>TG36:0</b>  | 1.2E-04 | -90.2    | 1.2E-04 | -18.4    | 1.1E-04 | -23.1    |         |          |
| <b>TG36:1</b>  | 1.2E-04 | -26.0    | 8.2E-04 | -3.5     |         |          |         |          |
| <b>TG37:0</b>  | 1.2E-04 | -28.4    | 3.5E-04 | -7.8     | 5.4E-04 | -11.6    |         |          |
| <b>TG38:0</b>  |         | -35.6    |         | -9.2     | 1.1E-04 | -10.3    |         |          |
| <b>TG38:1</b>  | 1.2E-04 | -20.3    | 9.4E-04 | -2.8     |         |          |         |          |
| <b>TG38:2</b>  | 1.2E-04 | -13.8    |         | -1.4     |         |          |         |          |
| <b>TG38:3</b>  | 1.2E-04 | -11.6    |         | -1.2     |         |          |         |          |
| <b>TG39:0</b>  | 1.2E-04 | -18.9    |         | -2.1     |         |          |         |          |
| <b>TG39:1</b>  | 1.2E-04 | -16.6    |         | -1.7     |         |          |         |          |

|        |         |      |         |      |         |      |         |      |
|--------|---------|------|---------|------|---------|------|---------|------|
| TG40:0 | 1.2E-04 | -8.9 |         | -2.1 | 1.2E-03 | -3.6 | 1.1E-03 | 8.1  |
| TG40:1 |         | -4.5 | 2.1E-04 | 1.6  |         |      |         |      |
| TG40:2 | 1.2E-04 | -7.8 |         | 1.1  |         |      |         |      |
| TG40:3 |         | -3.3 |         | 2.9  |         |      |         |      |
| TG41:0 | 5.6E-04 | -4.6 |         | 1.0  |         |      |         |      |
| TG41:1 | 6.5E-04 | -4.0 |         | 1.7  |         |      |         |      |
| TG42:0 | 1.2E-04 | -5.7 |         | -1.8 |         |      | 6.4E-03 | 8.1  |
| TG42:1 | 4.8E-04 | -2.7 |         | 2.0  | 9.6E-03 | 1.7  | 5.1E-05 | 17.2 |
| TG42:2 | 6.2E-04 | -3.5 |         | 2.5  |         |      | 7.6E-05 | 24.8 |
| TG42:3 |         | -3.3 |         | 3.6  |         |      |         |      |
| TG43:0 |         | -1.3 | 9.3E-03 | 2.6  |         |      | 9.4E-03 | 7.3  |
| TG43:1 |         | -1.5 | 6.1E-03 | 4.2  |         |      |         |      |
| TG44:0 | 5.8E-03 | -1.8 |         | 1.3  |         |      | 4.7E-05 | 10.3 |
| TG44:1 |         | -1.1 | 1.3E-04 | 3.4  | 6.7E-03 | 3.0  | 3.7E-05 | 21.1 |
| TG44:2 |         | 1.2  | 1.2E-04 | 6.8  | 5.2E-03 | 4.0  | 3.7E-05 | 48.8 |
| TG44:3 | 1.4E-04 | -2.8 | 4.0E-03 | 3.2  |         |      | 3.9E-04 | 17.7 |
| TG46:1 | 1.2E-04 | 2.7  | 1.2E-04 | 5.8  | 6.5E-05 | 5.3  | 2.8E-05 | 21.3 |
| TG46:2 |         | 1.9  | 1.2E-04 | 6.8  | 2.6E-04 | 5.3  | 2.8E-05 | 44.1 |
| TG46:3 |         | 1.9  | 1.2E-04 | 13.1 | 7.6E-04 | 7.6  | 3.2E-05 | 33.8 |
| TG46:4 | 2.7E-04 | -1.6 | 1.2E-04 | 9.1  |         |      |         |      |
| TG47:3 | 1.2E-04 | 4.0  | 1.2E-04 | 19.7 |         |      |         |      |
| TG48:1 | 1.2E-04 | 2.3  | 1.2E-04 | 3.2  | 2.3E-04 | 3.4  | 2.9E-05 | 6.9  |
| TG48:2 | 1.2E-04 | 2.7  | 1.2E-04 | 5.8  | 6.5E-05 | 6.7  | 2.8E-05 | 11.8 |
| TG48:3 | 1.2E-04 | 4.9  | 1.2E-04 | 19.0 | 6.5E-05 | 14.8 | 2.8E-05 | 64.2 |
| TG48:4 | 1.2E-04 | 4.8  | 1.2E-04 | 25.9 | 6.5E-05 | 16.6 | 2.8E-05 | 69.5 |
| TG48:5 | 1.2E-04 | 4.9  | 1.2E-04 | 41.8 | 4.5E-03 | 31.0 | 8.7E-04 | 51.3 |
| TG50:2 |         | 1.7  | 2.4E-04 | 2.4  | 5.9E-03 | 2.4  | 1.0E-04 | 2.8  |
| TG50:3 | 1.2E-04 | 4.7  | 1.2E-04 | 9.2  | 6.5E-05 | 7.9  | 2.8E-05 | 13.4 |
| TG50:4 | 1.2E-04 | 3.6  | 1.2E-04 | 9.5  | 6.5E-05 | 7.1  | 2.8E-05 | 14.0 |
| TG50:5 | 1.2E-03 | 4.0  | 1.2E-04 | 15.3 | 1.1E-04 | 12.8 | 1.8E-04 | 20.4 |
| TG50:6 | 1.2E-04 | 10.5 | 1.2E-04 | 22.7 |         |      | 8.8E-03 | 54.9 |

|          |         |       |         |      |         |      |         |       |  |
|----------|---------|-------|---------|------|---------|------|---------|-------|--|
| TG51:3   | 2.1E-04 | 2.2   |         | 1.0  |         |      |         |       |  |
| TG51:4   |         | -16.0 |         | 1.6  |         |      |         |       |  |
| TG52:1   |         |       |         |      |         |      | 1.7E-03 | 2.3   |  |
| TG52:2   |         |       |         |      |         |      | 8.7E-04 | 1.6   |  |
| TG52:3   |         | 1.3   | 2.9E-04 | 2.2  |         |      | 4.3E-04 | 2.1   |  |
| TG52:4   |         | -1.6  |         | 1.4  |         |      |         |       |  |
| TG52:5   |         | -1.7  |         | 1.5  |         |      |         |       |  |
| TG52:6   | 1.2E-04 | -5.3  |         | -1.8 |         |      |         |       |  |
| TG52:7   | 1.2E-04 | 7.8   | 1.2E-04 | 22.7 |         |      |         |       |  |
| TG53:1   |         | 1.3   | 7.6E-04 | 2.0  |         |      | 1.1E-03 | 3.6   |  |
| TG53:2   | 4.7E-03 | 1.8   | 1.7E-04 | 2.3  | 1.4E-03 | 3.1  | 2.0E-04 | 3.1   |  |
| TG53:3   |         | 1.6   | 1.2E-04 | 3.4  | 2.6E-04 | 2.9  | 7.6E-05 | 3.2   |  |
| TG54:1   | 2.1E-04 | -1.8  | 9.7E-04 | -1.7 |         |      |         |       |  |
| TG54:2   | 3.5E-04 | -1.8  |         | -1.5 |         |      |         |       |  |
| TG54:3   | 1.2E-04 | -3.7  | 1.2E-04 | -2.5 |         |      | 3.9E-04 | -2.3  |  |
| TG54:4   | 1.2E-04 | -2.5  |         | -1.3 |         |      | 3.1E-03 | -1.7  |  |
| TG54:5   | 1.2E-04 | -6.1  | 2.8E-04 | -2.3 | 1.0E-03 | -3.2 | 7.6E-05 | -3.1  |  |
| TG54:5_2 | 1.2E-04 | 3.0   | 1.2E-04 | 2.7  | 1.1E-04 | 2.1  | 3.1E-05 | 2.7   |  |
| TG54:6   | 1.2E-04 | -19.7 | 1.2E-04 | -5.2 | 1.1E-04 | -7.8 | 2.8E-05 | -6.7  |  |
| TG54:7   | 1.2E-04 | -34.2 | 1.2E-04 | -6.3 | 4.2E-04 | -8.5 | 3.2E-05 | -10.3 |  |
| TG54:7_2 | 1.2E-04 | 4.7   | 1.2E-04 | 7.1  |         |      | 2.4E-03 | 9.0   |  |
| TG54:8   | 1.2E-04 | -58.3 | 2.7E-04 | -6.8 |         |      |         |       |  |
| TG55:2   |         |       |         |      |         |      | 5.7E-04 | 2.5   |  |
| TG56:2   |         | -1.4  | 2.2E-04 | -2.0 |         |      |         |       |  |
| TG56:3   |         | -1.2  | 3.3E-03 | -1.8 |         |      | 7.1E-04 | -1.9  |  |
| TG56:4   |         |       |         |      |         |      | 1.8E-03 | -1.6  |  |
| TG56:6_1 | 1.2E-04 | 53.4  | 1.2E-04 | 43.8 |         |      |         |       |  |
| TG56:6_2 | 1.2E-04 | 1.7   | 1.2E-04 | 1.9  |         |      |         |       |  |
| TG56:7_1 | 1.2E-04 | 7.7   | 1.2E-04 | 21.9 |         |      |         |       |  |
| TG56:7_2 | 1.2E-04 | 13.2  | 1.2E-04 | 9.1  | 9.6E-03 | 7.2  | 3.2E-05 | 27.2  |  |
| TG56:8   | 1.2E-04 | 11.8  | 1.2E-04 | 12.9 |         |      |         |       |  |

|          |         |          |         |          |         |          |         |       |
|----------|---------|----------|---------|----------|---------|----------|---------|-------|
| TG56:9   | 1.2E-04 | 4.0      | 1.2E-04 | 6.3      |         |          | 8.0E-03 | 10.7  |
| TG57:2   | 1.4E-04 | -3.5     | 2.5E-04 | -3.2     |         |          |         |       |
| TG58:10  | 1.2E-04 | 1.9      | 1.2E-04 | 4.4      |         |          |         |       |
| TG58:11  |         | -13.5    |         | -11.9    |         |          |         |       |
| TG58:2   | 1.0E-03 | -2.4     | 1.2E-04 | -11.5    | 2.1E-04 | -7.8     | 1.8E-04 | -6.7  |
| TG58:3   |         | 1.0      | 4.9E-04 | -2.3     |         |          |         |       |
| TG58:4   |         | -1.4     | 1.2E-04 | -3.8     | 8.7E-04 | -3.7     | 1.4E-03 | -2.8  |
| TG58:5   |         | 2.8      |         | 1.1      |         |          |         |       |
| TG58:6   | 1.2E-04 | 74.1     | 1.2E-04 | 31.6     | 4.5E-03 | 17.1     | 2.8E-05 | 20.3  |
| TG58:7_1 | 1.2E-04 | 38.7     | 1.2E-04 | 31.0     |         |          |         |       |
| TG58:7_2 | 1.2E-04 | 19.4     | 1.2E-04 | 15.0     | 9.6E-03 | 9.9      | 9.4E-03 | 31.1  |
| TG58:8_1 | 1.2E-04 | 45.4     | 1.2E-04 | 45.3     |         |          |         |       |
| TG58:8_2 | 1.2E-04 | 12.5     | 1.2E-04 | 15.5     |         |          |         |       |
| TG58:9   | 1.2E-04 | 3.0      | 1.2E-04 | 4.3      |         |          |         |       |
| TG60:12  |         | nd in HM |         | nd in HM | 2.0E-03 | nd in HM | 3.4E-03 | -10.8 |
| TG60:2   | 1.9E-04 | -3.2     | 1.2E-04 | -17.6    | 2.3E-04 | -8.6     | 3.7E-05 | -13.8 |
| TG60:3   | 1.2E-04 | -262.7   | 1.2E-04 | -6.4     |         |          |         |       |
| TG60:4   |         | -1.9     | 1.2E-04 | -7.1     | 1.1E-04 | -10.4    | 4.7E-04 | -7.7  |
| TG60:5   | 9.2E-03 | 2.7      |         | -2.2     |         |          |         |       |
| TG62:3   | 1.3E-04 | 6.8      | 1.3E-04 | -3.7     |         |          |         |       |
| TG62:4   | 1.2E-04 | 4.2      | 4.2E-04 | -4.0     |         |          | 2.6E-03 | -9.0  |
| TG62:5   | 2.0E-03 | 2.2      | 1.4E-04 | -6.4     |         |          | 6.4E-03 | -16.2 |
| TG62:6   | 1.2E-04 | 5.1      | 1.6E-04 | -1.7     | 9.3E-03 | nd in HM |         |       |
| TG62:7   | 1.2E-04 | 3.7      |         | -2.4     |         |          |         |       |
| TG62:8   | 1.2E-04 | -1.4     | 1.2E-04 | -36.2    |         |          |         |       |
| TG63:2   | 1.2E-04 | -6.6     | 1.2E-04 | -22.9    |         |          |         |       |
| TG63:6   | 5.8E-04 | -1.2     | 1.2E-04 | -2.9     |         |          |         |       |
| TG64:4   | 1.2E-04 | 6.1      |         | -2.9     |         |          |         |       |
| TG64:6   | 1.2E-04 | 14.9     |         | 1.2      |         |          |         |       |

|                 |         |       |         |          |         |          |         |          |
|-----------------|---------|-------|---------|----------|---------|----------|---------|----------|
| <b>TG64:8</b>   |         | -1.4  | 1.2E-04 | nd in HM | 7.9E-04 | nd in HM |         |          |
| <b>TG66:18</b>  | 1.2E-04 | -16.0 | 1.2E-04 | -16.0    |         |          |         |          |
| <b>TGO-50:1</b> | 1.2E-04 | 109.5 | 1.2E-04 | 23.5     |         |          | 1.0E-04 | nd in FM |
| <b>TGO-52:1</b> | 1.2E-04 | 16.9  | 1.2E-04 | 3.4      | 7.8E-03 | 9.0      | 1.0E-04 | nd in FM |
| <b>TGO-52:2</b> | 1.2E-04 | 96.0  | 1.2E-04 | 28.6     |         |          |         |          |
| <b>TGO-54:2</b> | 1.2E-04 | 20.7  | 1.2E-04 | 7.6      |         |          | 4.3E-05 | nd in FM |
| <b>TGO-54:3</b> | 1.2E-04 | 66.5  | 1.2E-04 | 28.2     |         |          | 6.4E-04 | nd in FM |

nd, not detected; ns, not statistically significant; blank space correspond to the not statistically significant different lipids; <sup>a</sup>negative fold change value value means higher peak area in the FM samples than in the HM samples, positive fold change value means higher peak area in the HM samples than in the FM samples. DG, diacylglycerol PC, glycerophosphocholine; PC-O, ether analogue of glycerophosphocholine; PE, glycerophosphoethanolamine; PE-O, ether analogue of glycerophosphoethanolamine; PS, glycerophosphoserine, PI, glycerophosphoinositol; SM, sphingomyelin; TG, triacylglycerol; TGO, ether analogue of triacylglycerol.

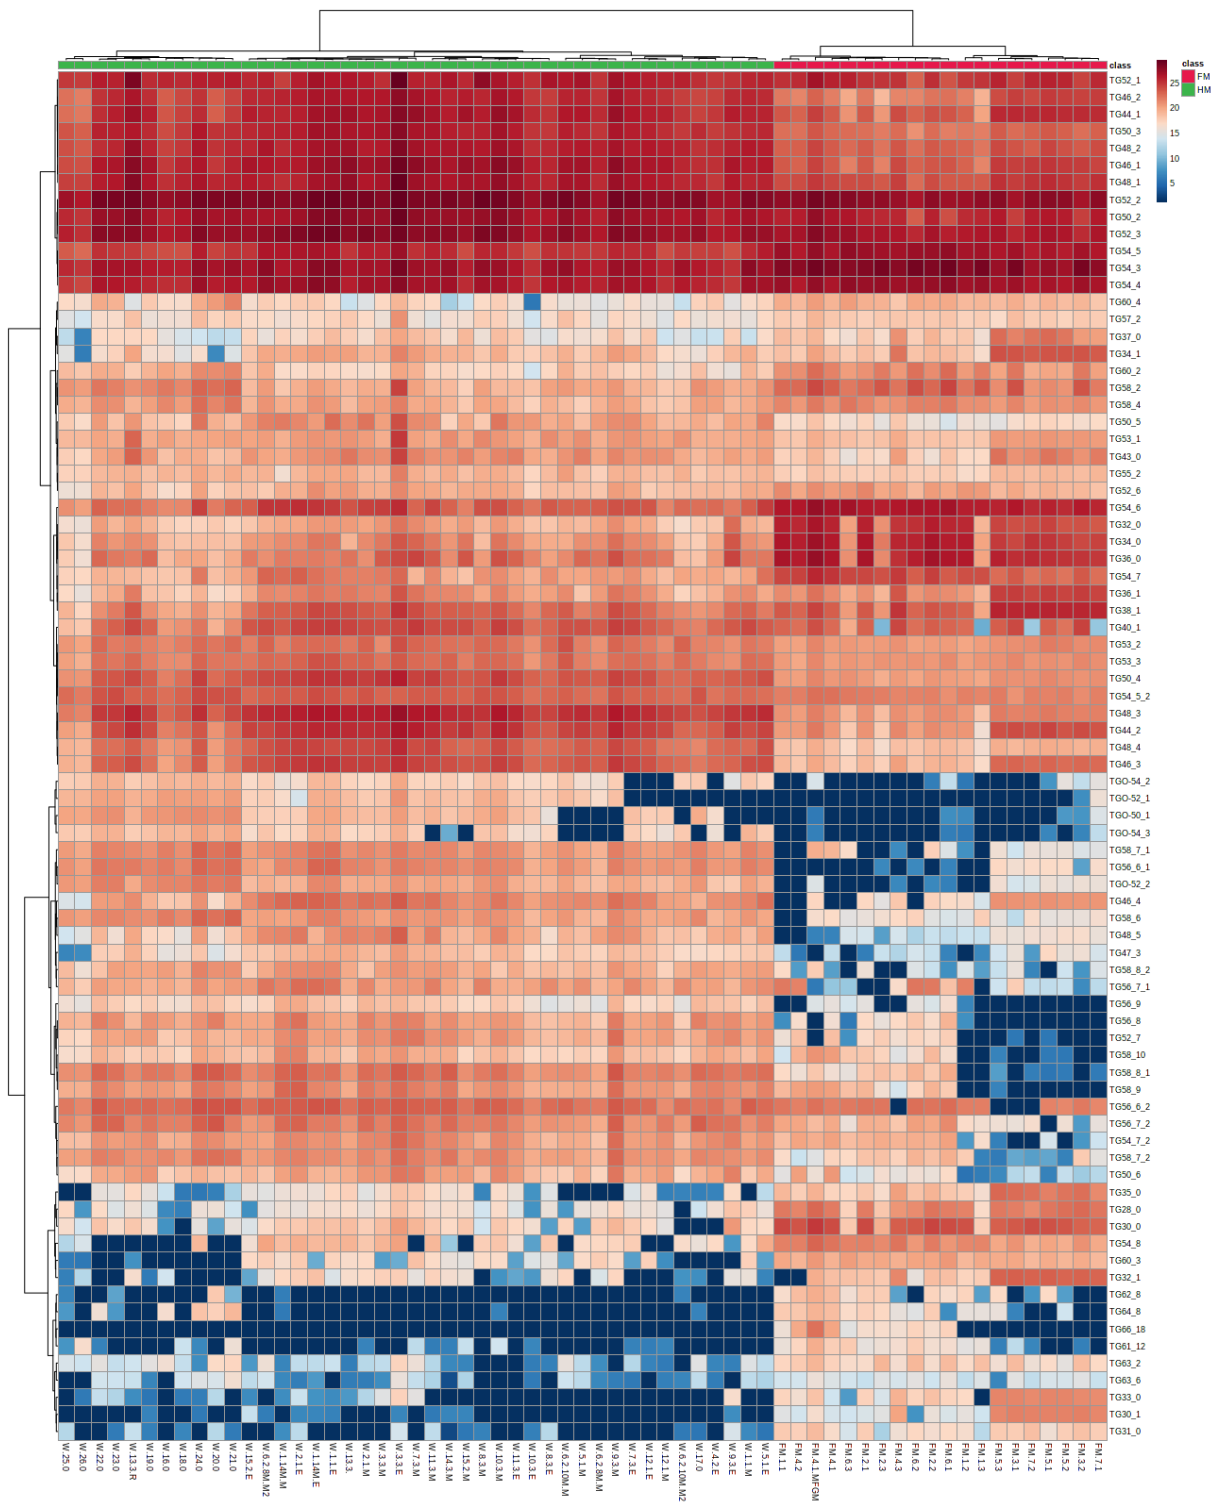

Figure S3. Clustering shown as a heatmap (distance measured using the Euclidean algorithm, and the clustering algorithm using Ward's method, for the top 80 TGs indicated in the Mann-Whitney test unpaired).

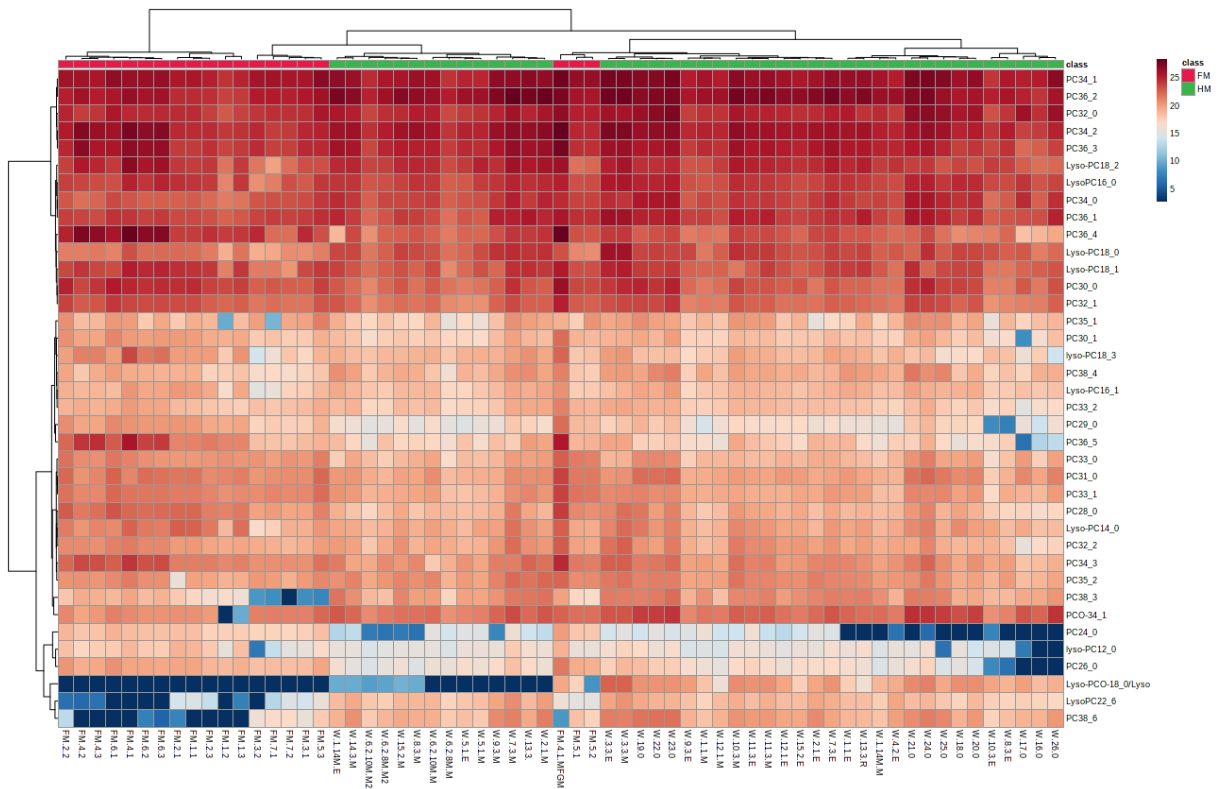

Figure S4. Clustering shown as a heatmap (distance measured using the Euclidean algorithm, and the clustering algorithm using Ward's method for the PCs detected in HM and/or FM samples.

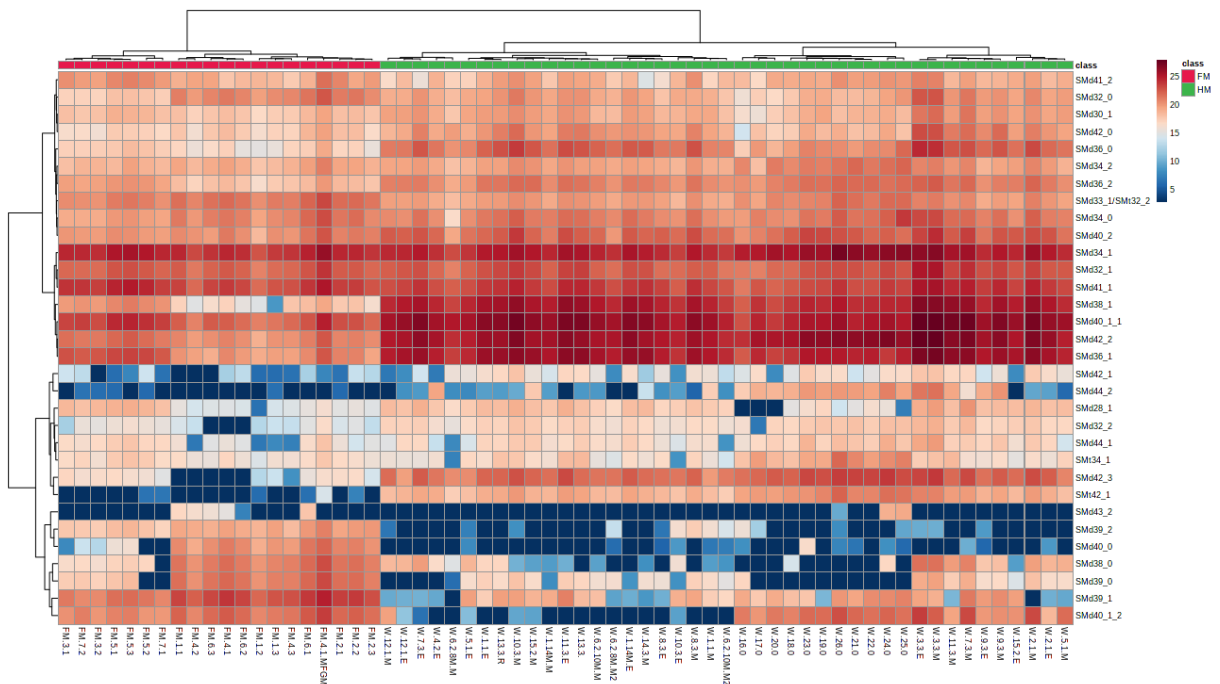

Figure S5. Clustering shown as a heatmap (distance measured using the Euclidean algorithm, and the clustering algorithm using Ward's method for the SMs detected in HM and/or FM samples.

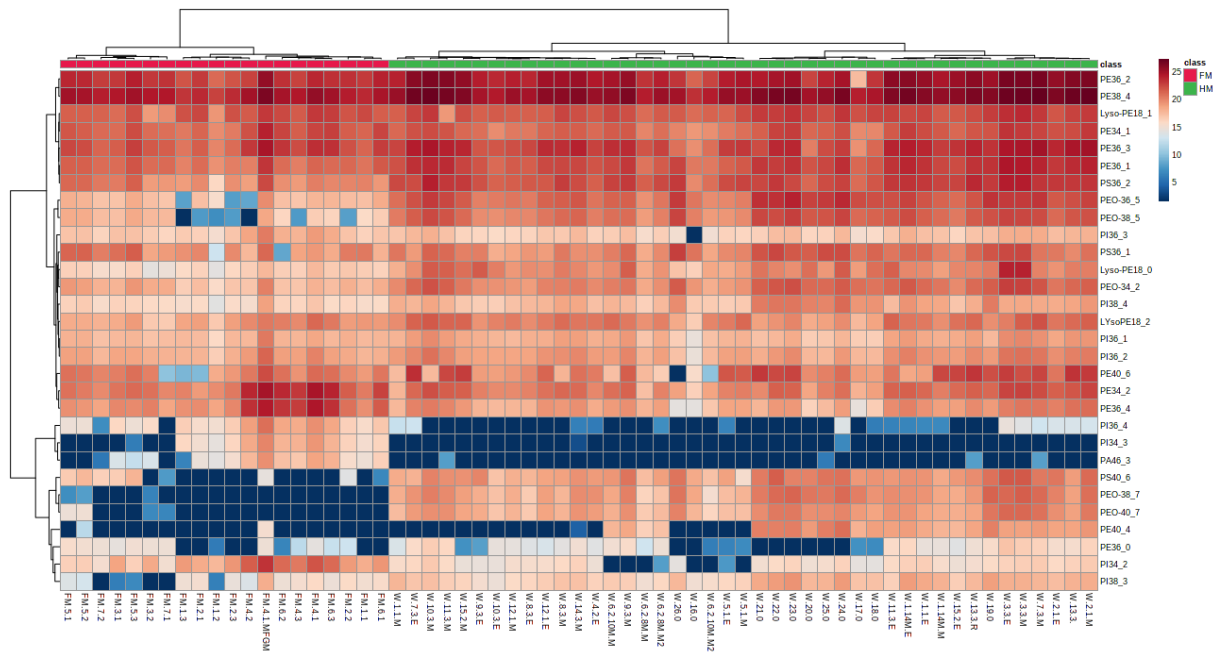

Figure S6. Clustering shown as a heatmap (distance measured using the Euclidean algorithm, and the clustering algorithm using Ward's method for the PEs, PIs and PSs detected in HM and/or FM samples.



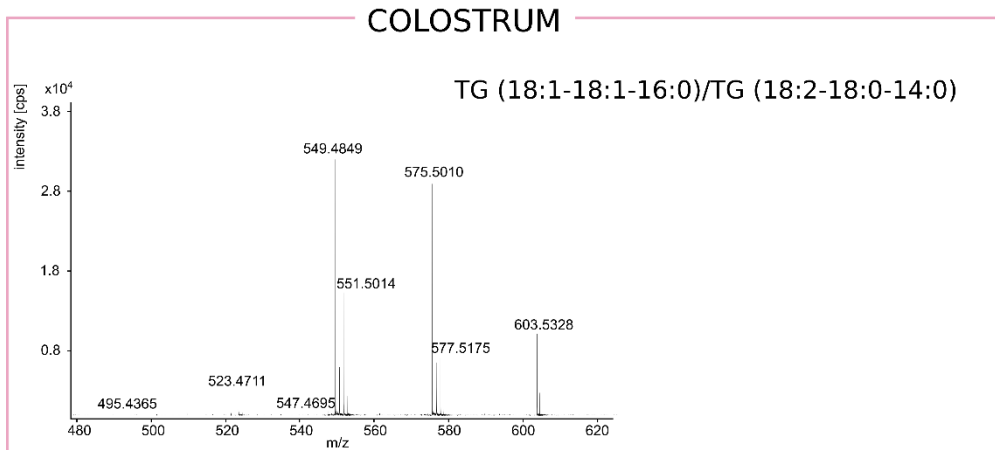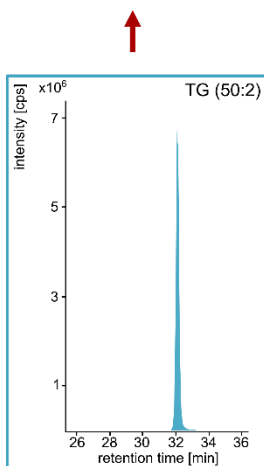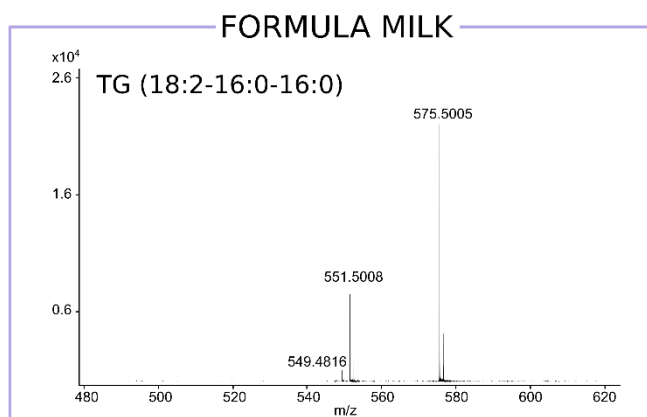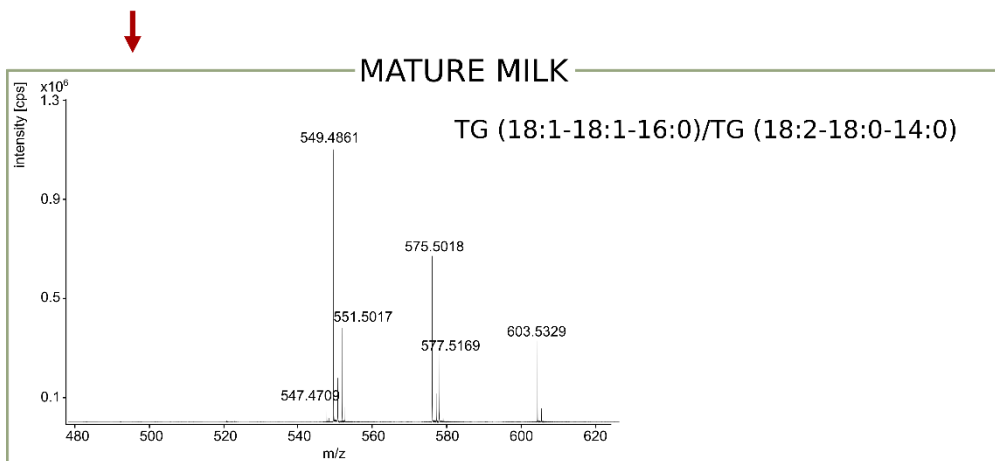

**Figure S7. The MS/MS spectra and fatty acyl substituents distribution of the TG50:2 detected in HM and FM samples. TG, triacylglycerol.**
